# Supplementary figures and images for: Dihydroxyquingdainone Induces Apoptosis in Leukaemia and Lymphoma Cells via the Mitochondrial Pathway in a Bcl-2- and Caspase-3-Dependent Manner and Overcomes Resistance to Cytostatic Drugs In Vitro
Source: MDPI journal article supplement (doi:10.3390/molecules27155038), 2022-08-08

4b

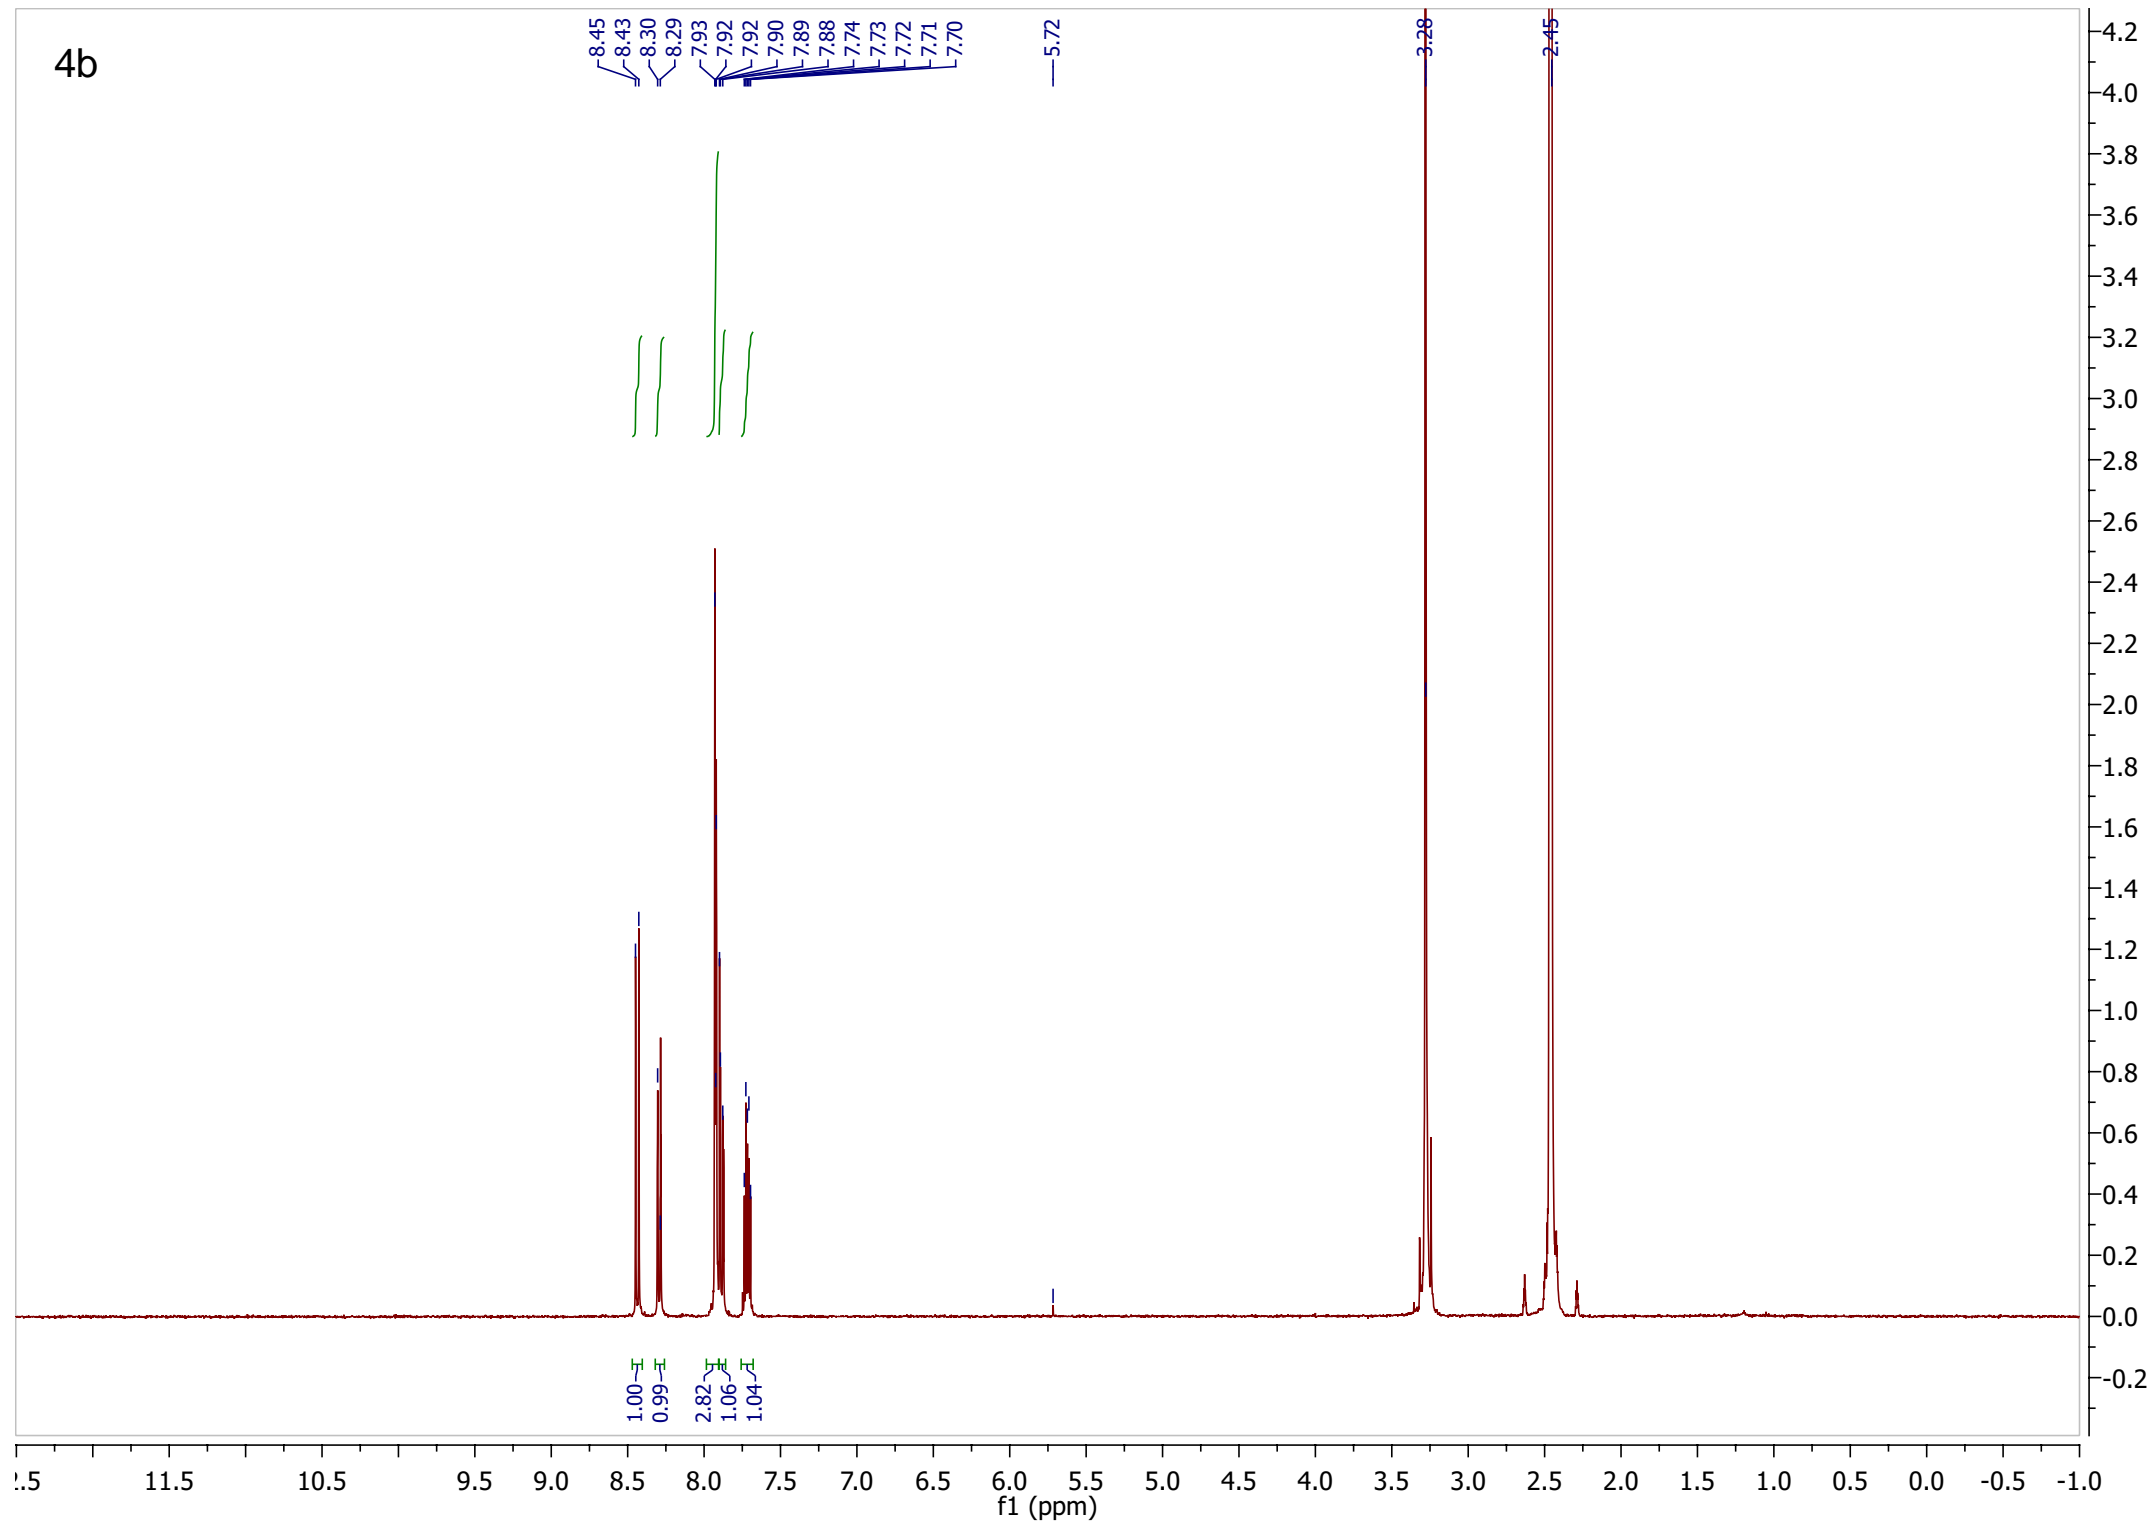

4b

181.86  
158.17  
146.92  
145.50  
144.97  
137.36  
135.88  
131.74  
130.58  
130.53  
127.53  
124.83  
124.54  
123.66  
119.15

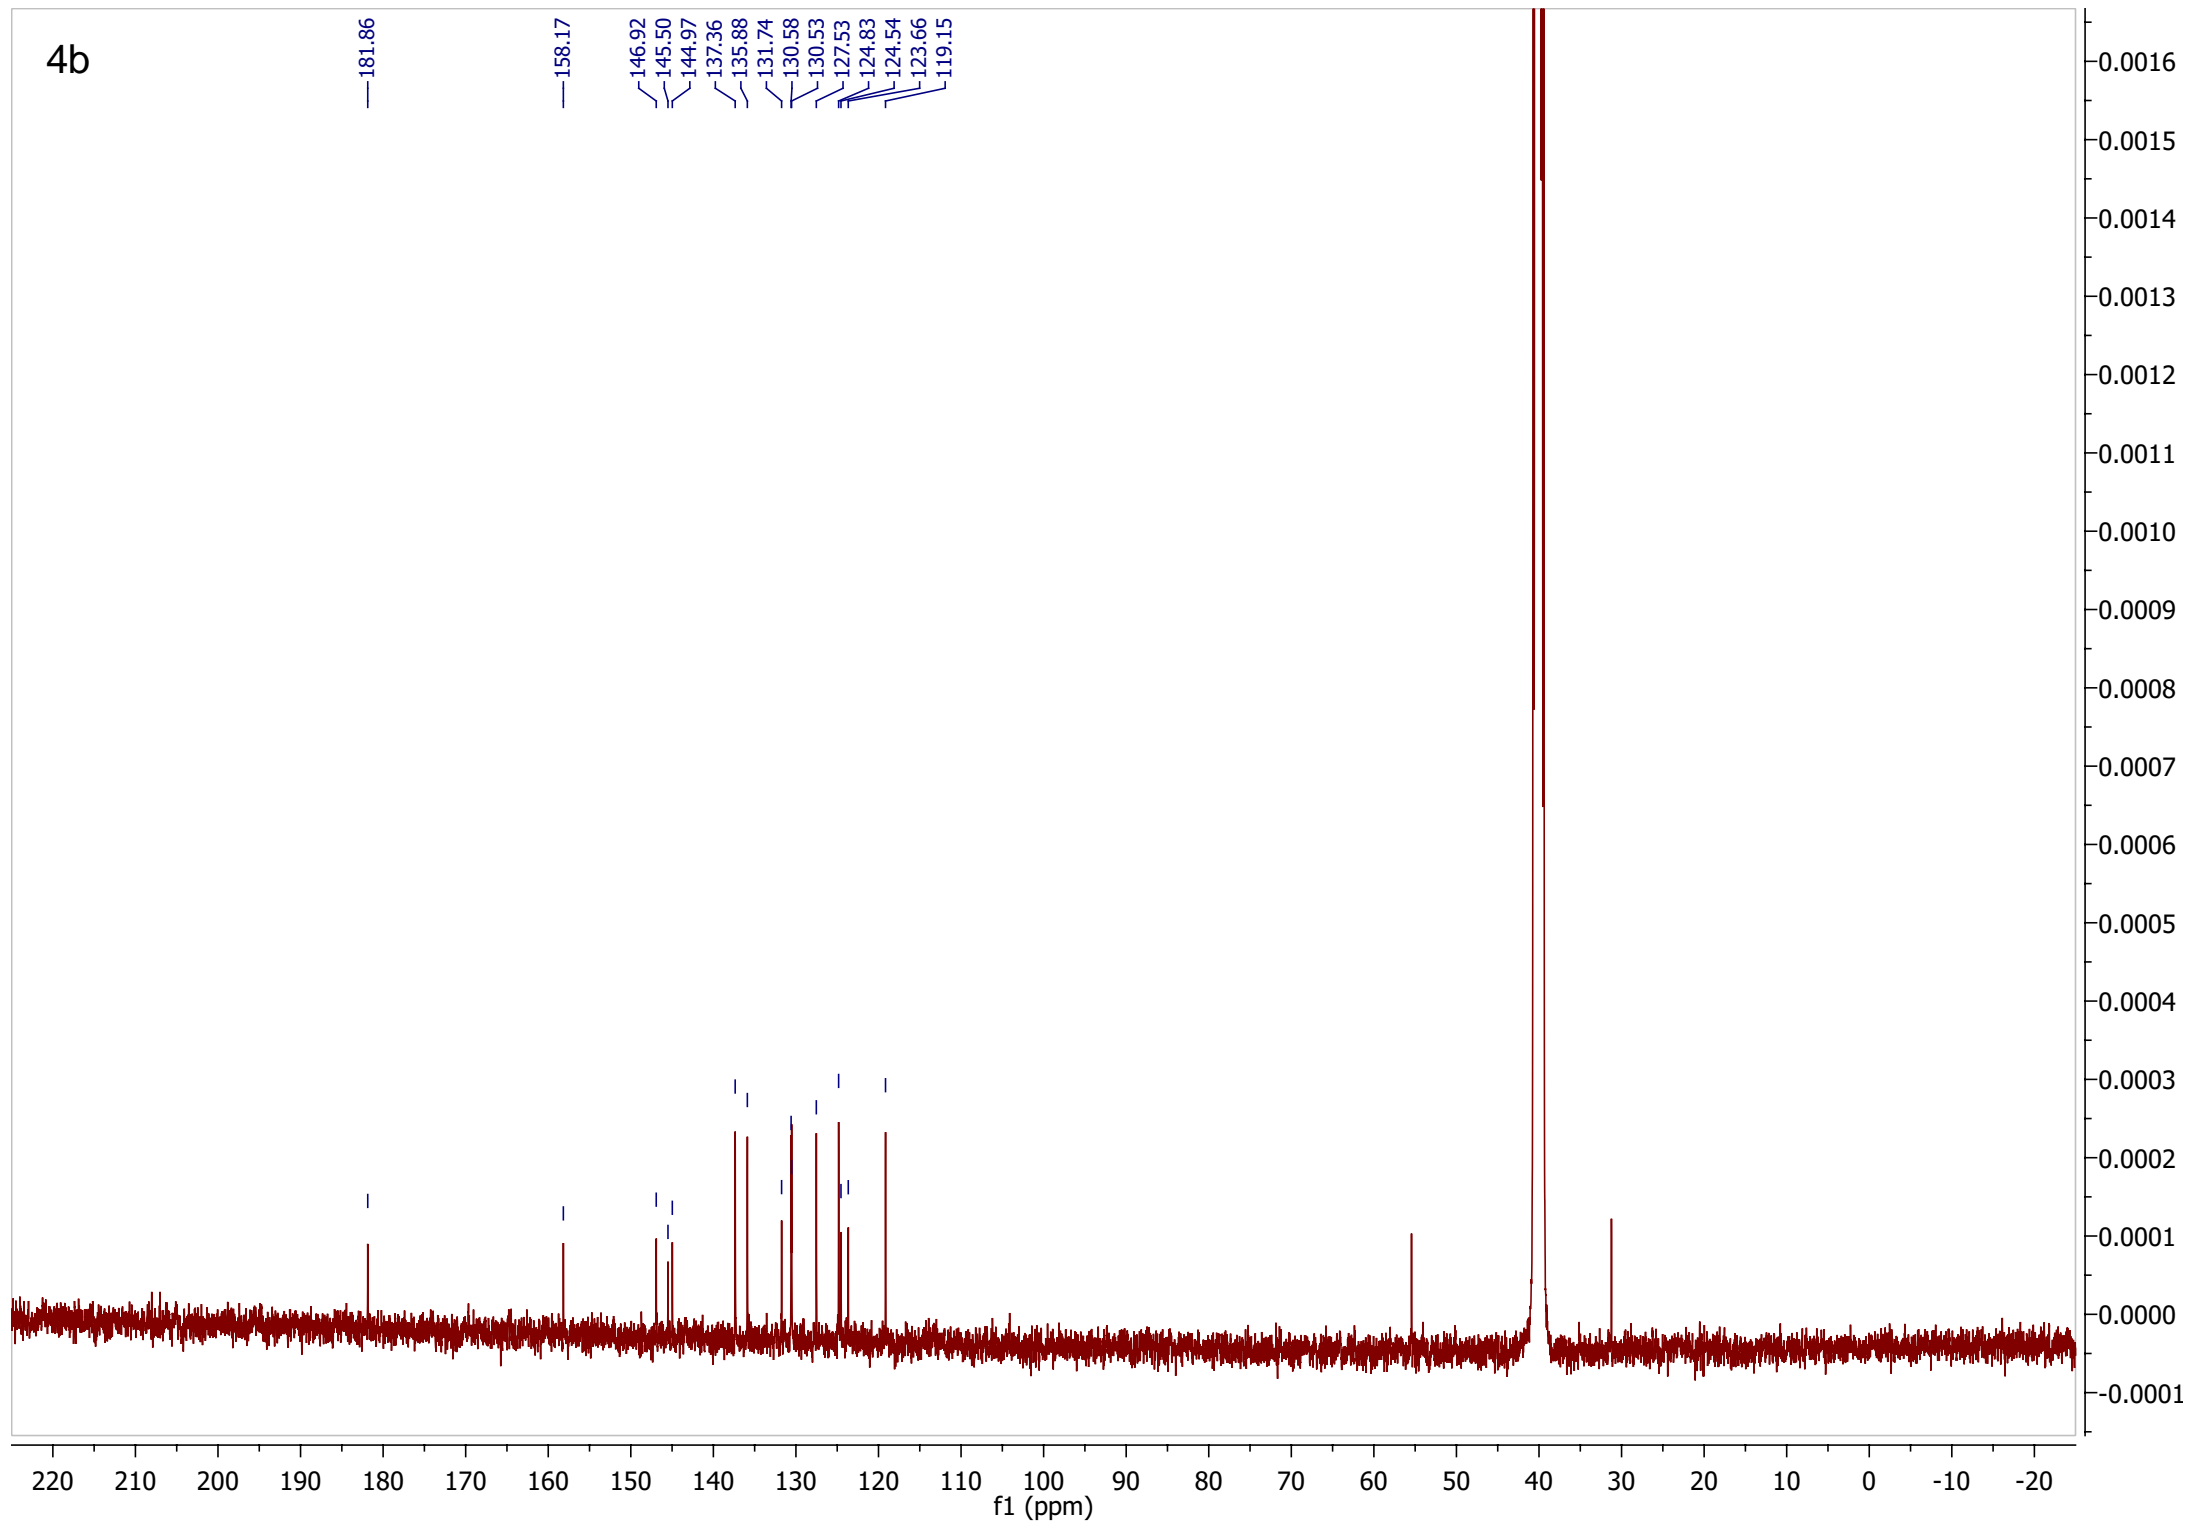

4c

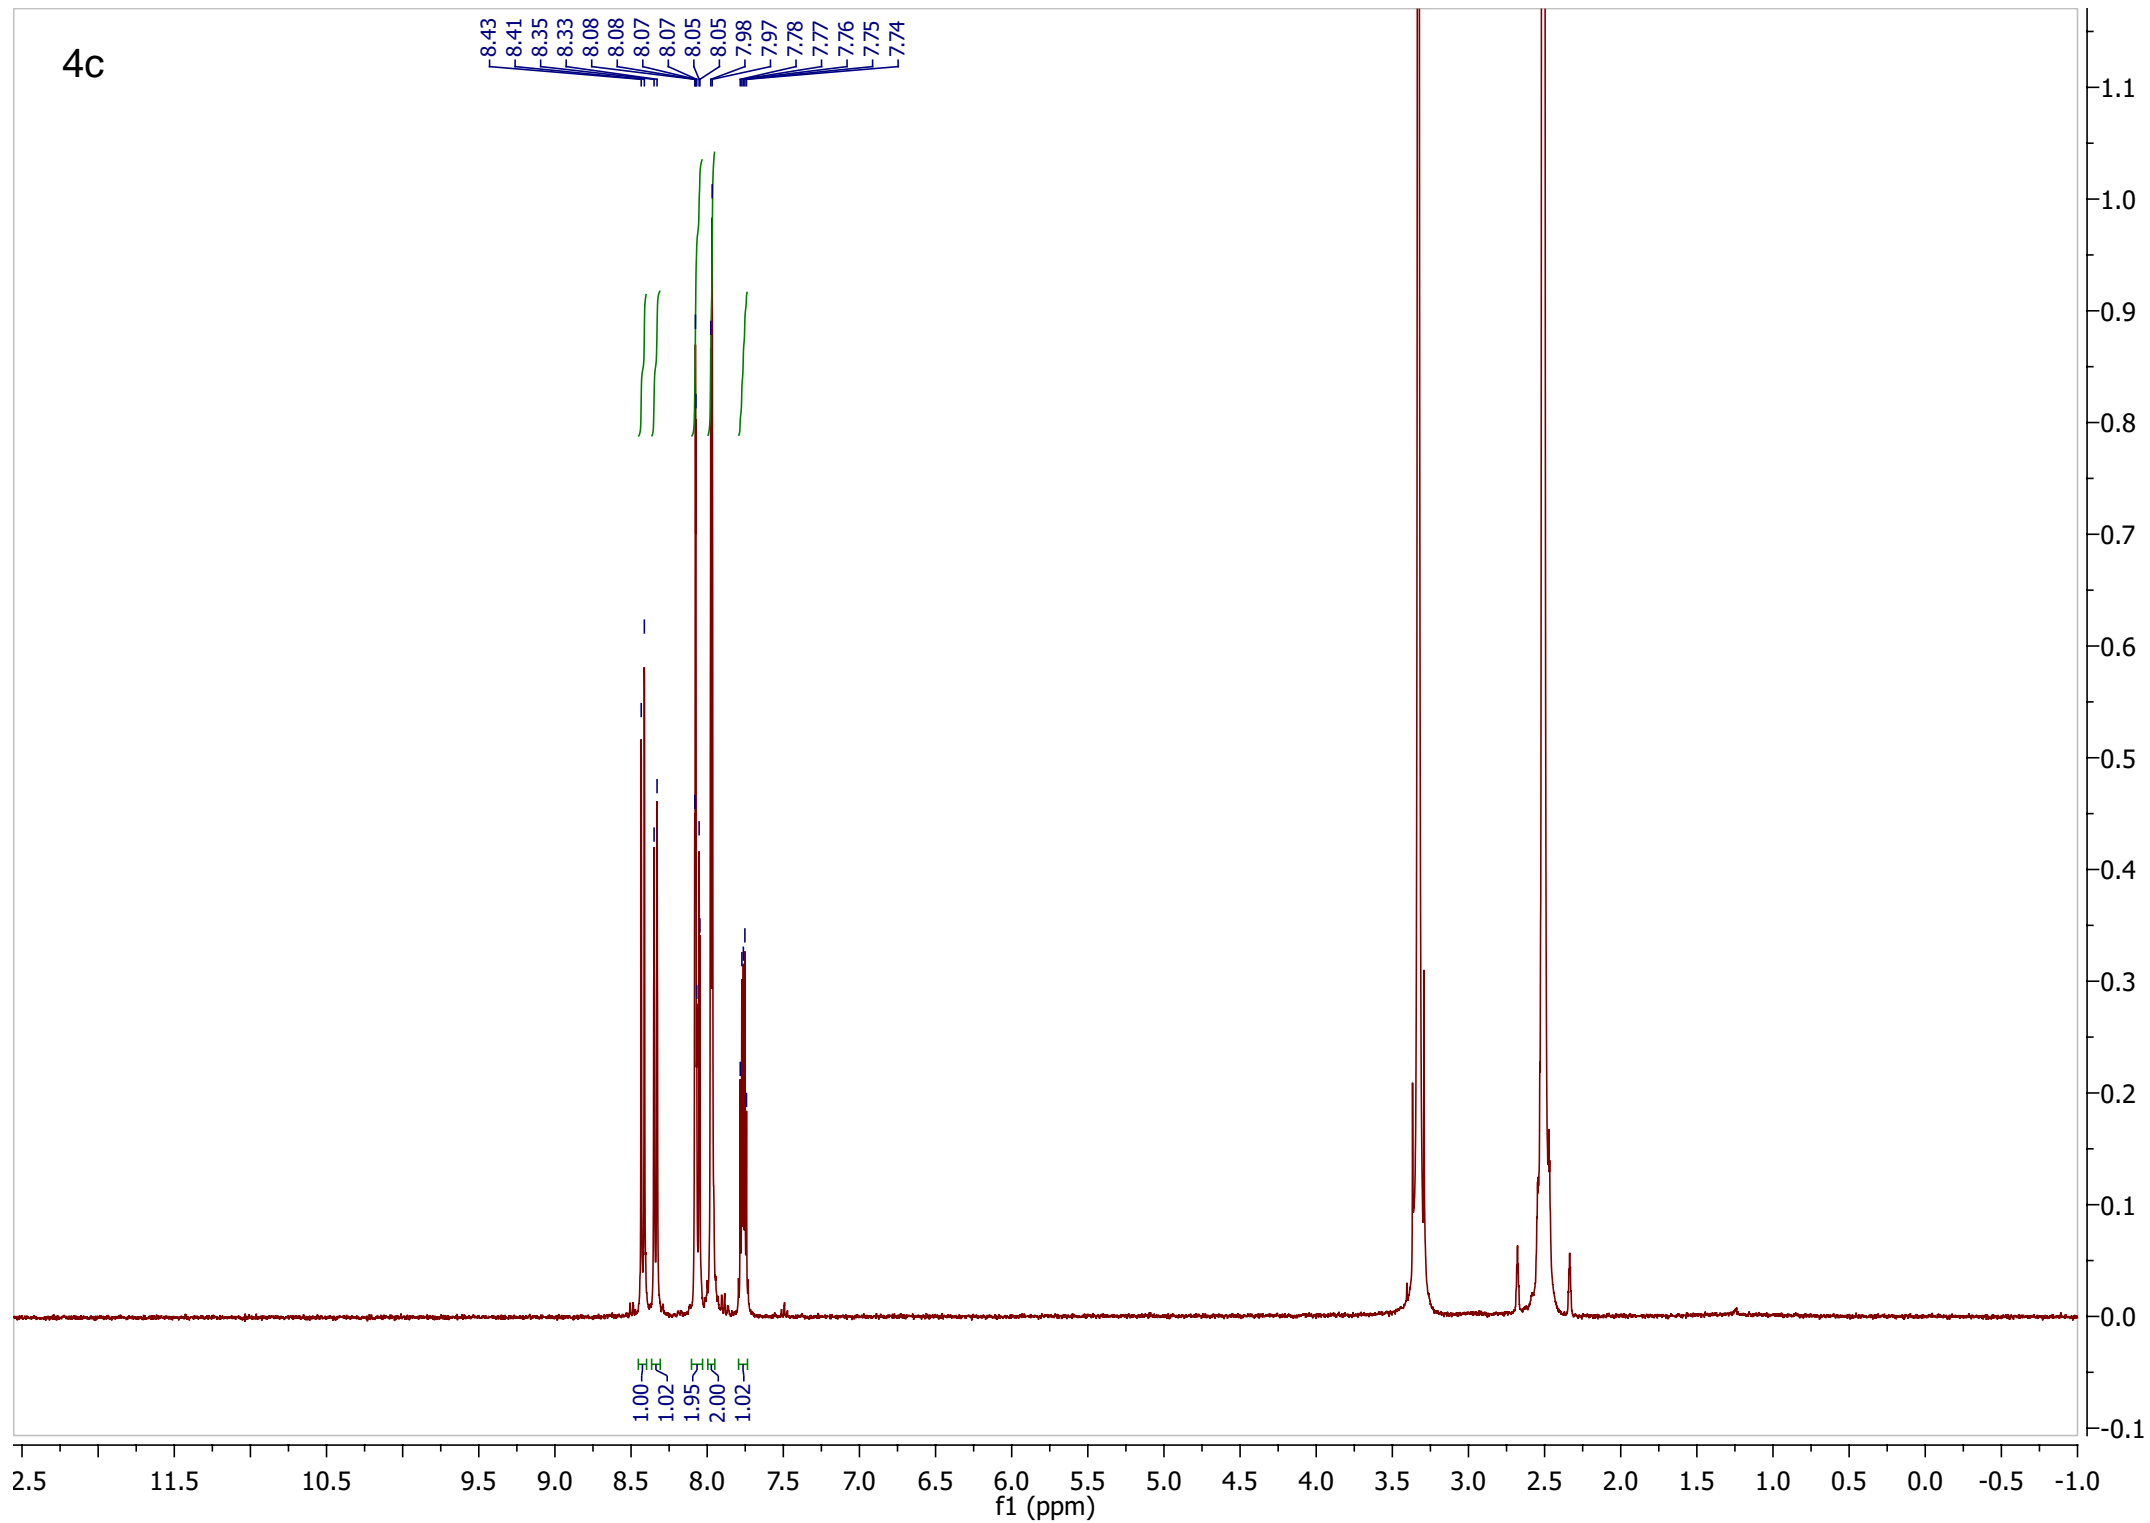

4c

— 181.74  
— 158.17  
146.93  
145.33  
140.23  
135.89  
130.58  
130.52  
127.64  
127.53  
124.80  
123.66  
119.66  
119.47

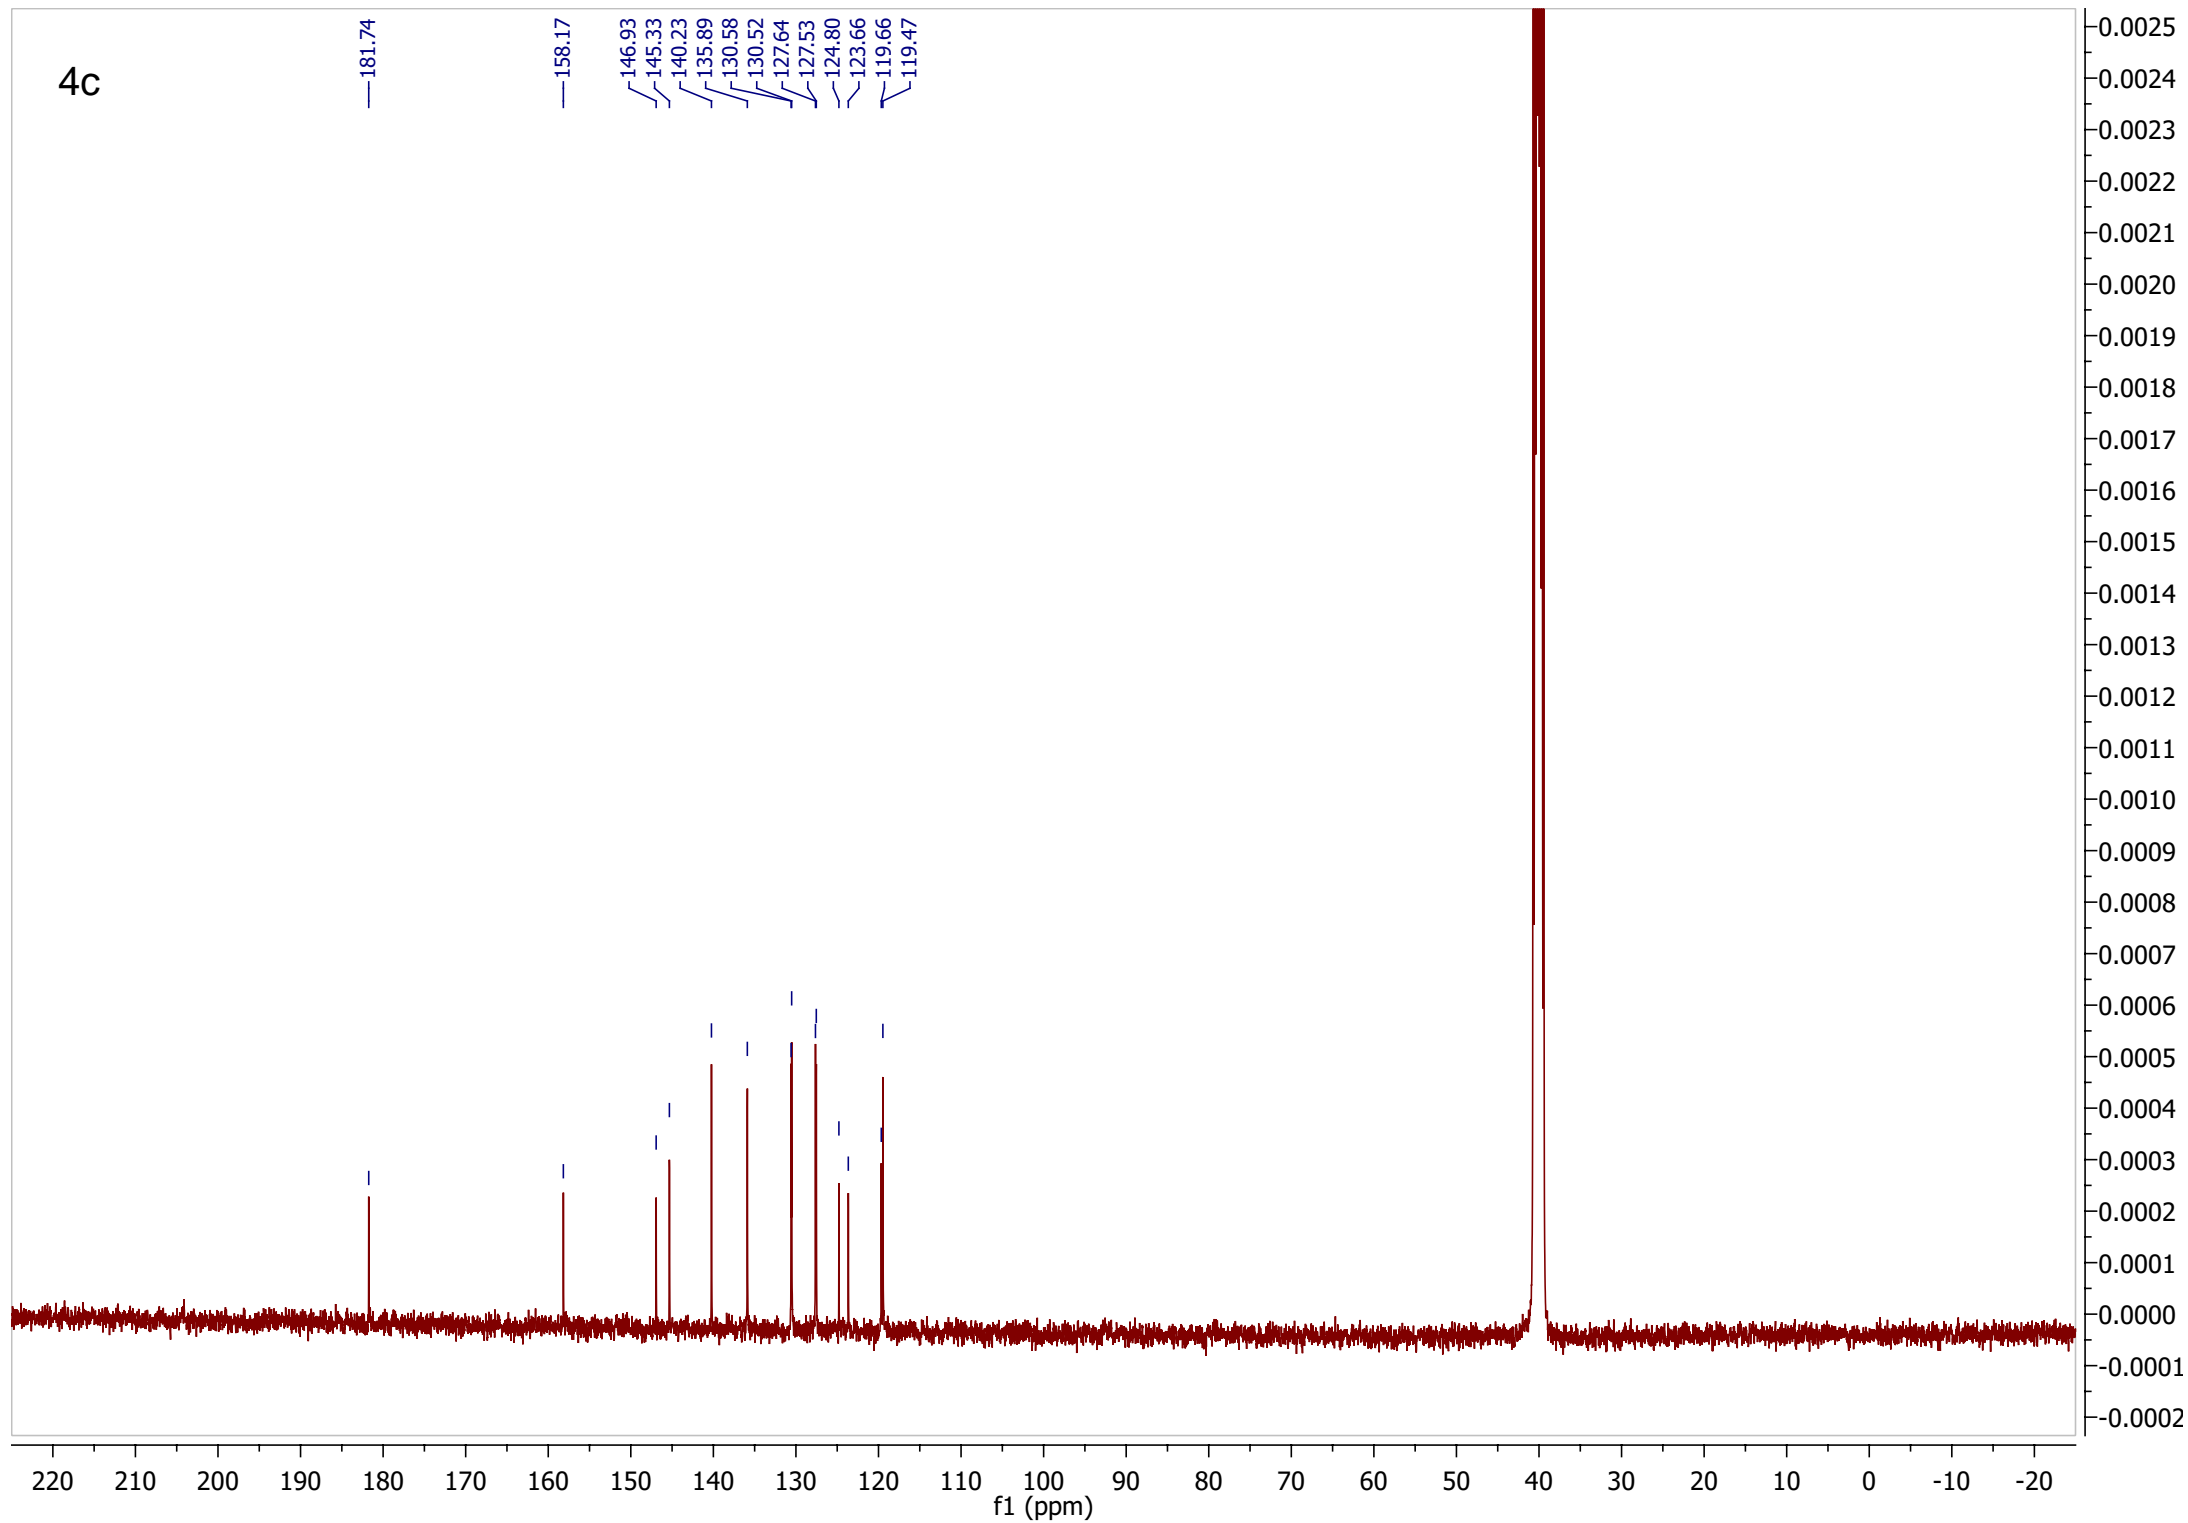

4d

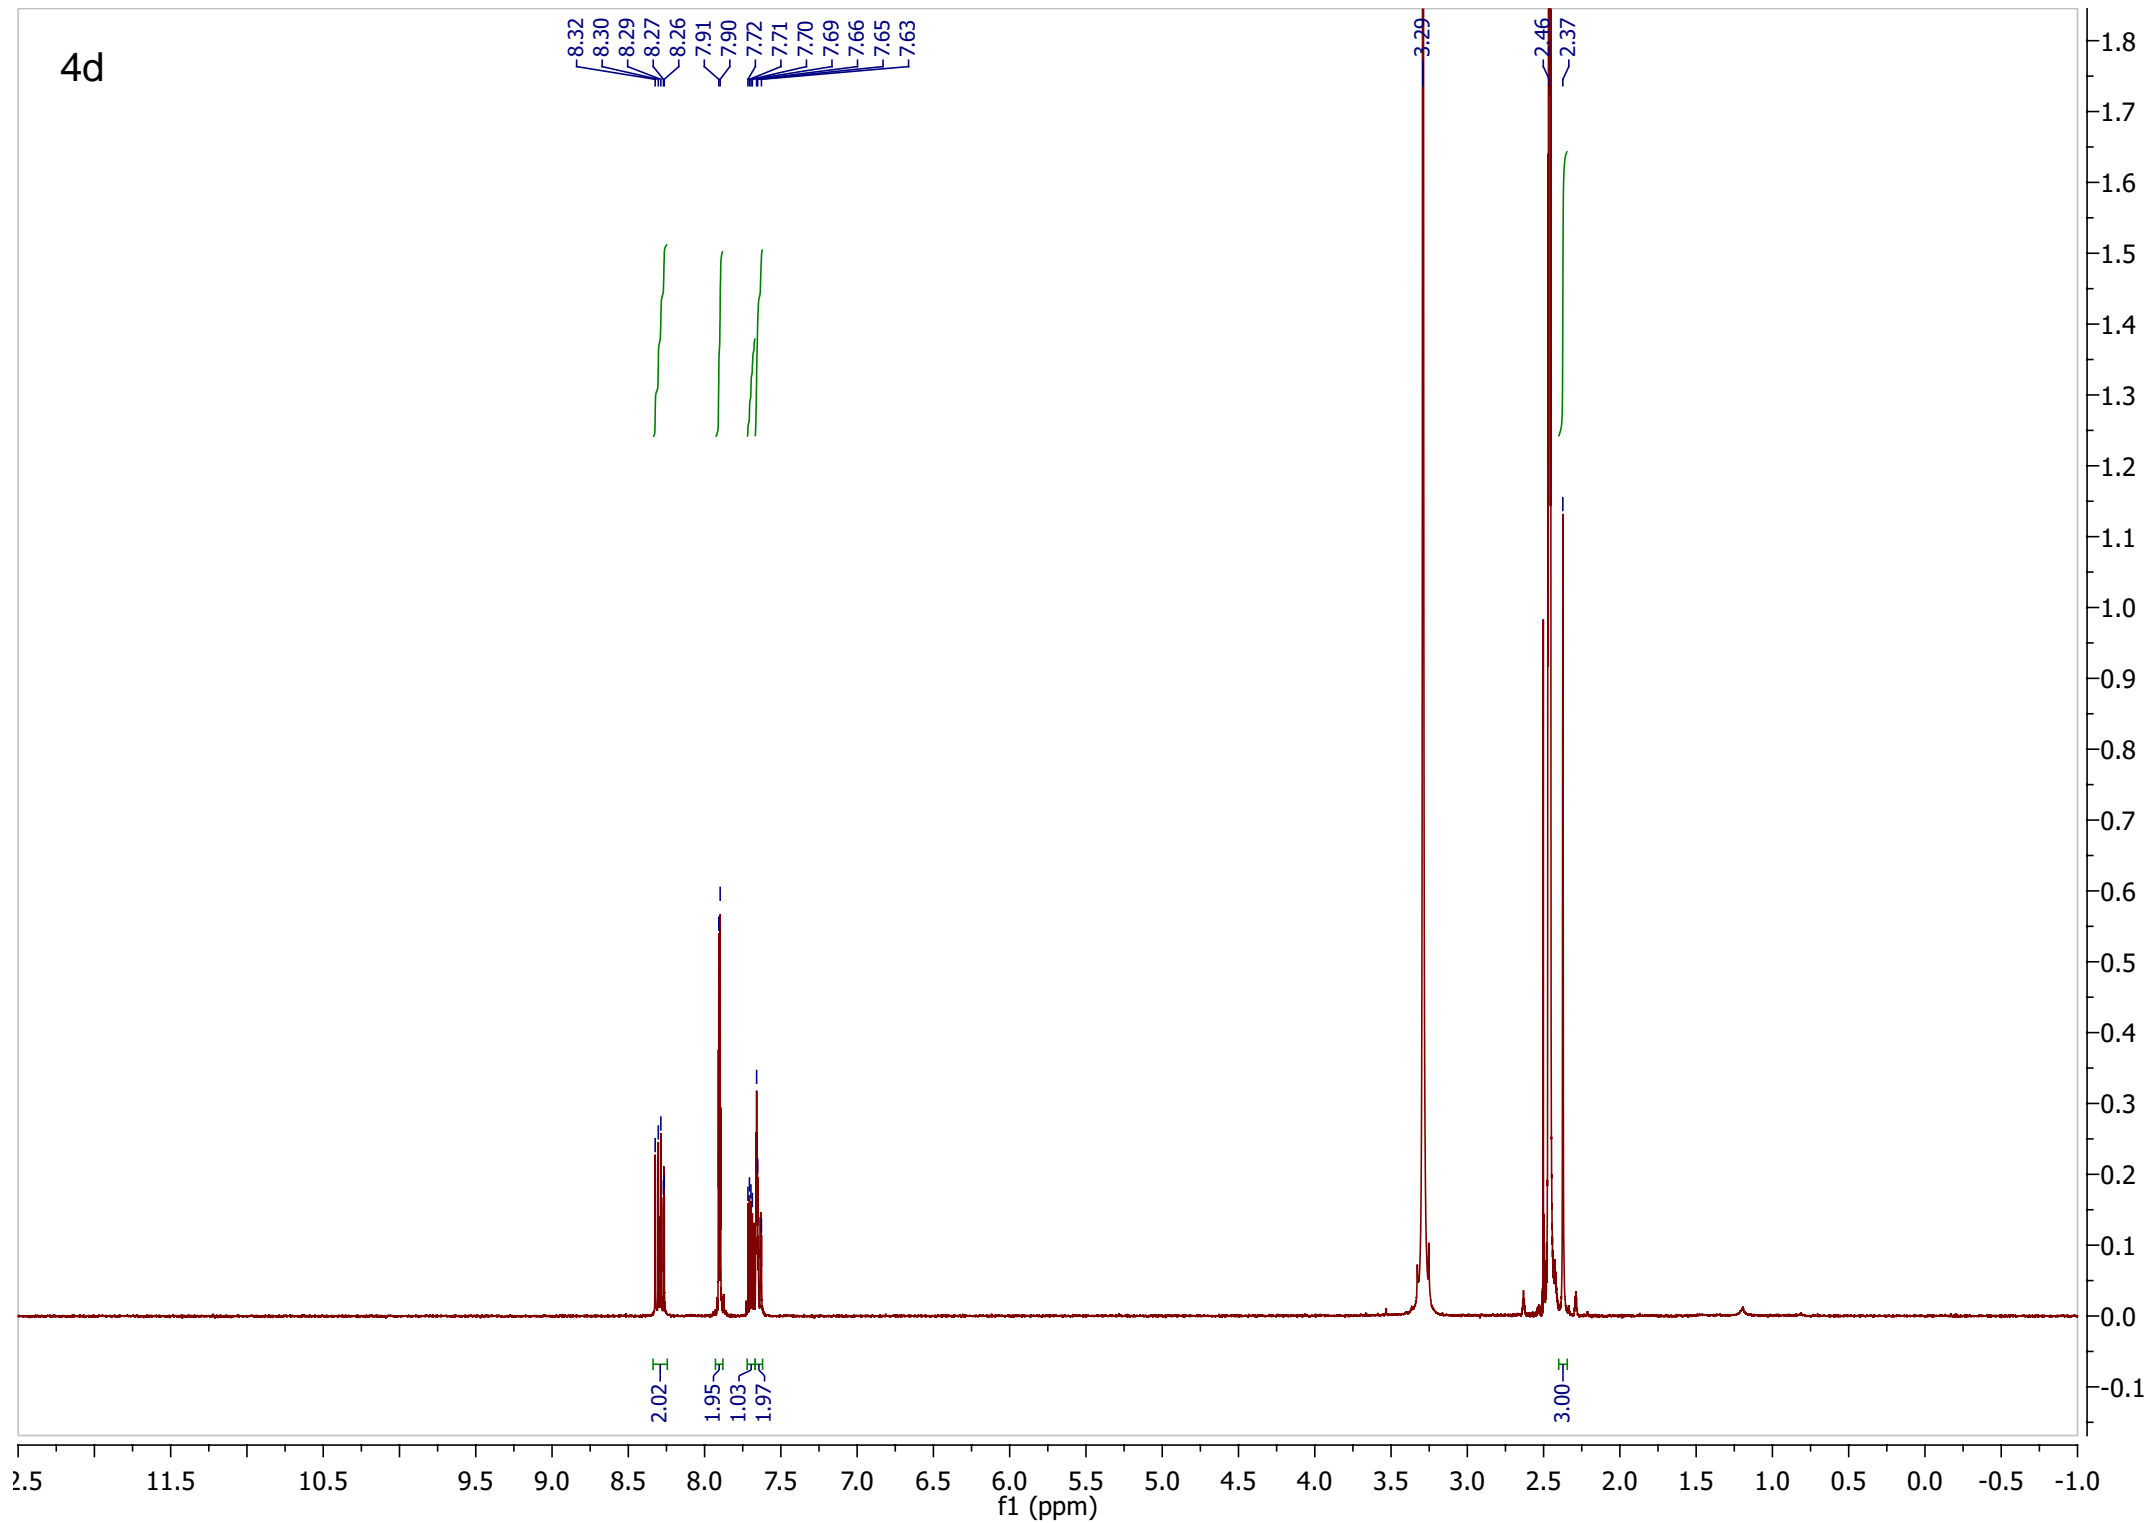

4d

—183.06

—158.06

147.02

145.76

—144.51

138.65

137.20

135.59

130.42

130.33

127.41

125.30

123.89

122.84

117.33

—20.96

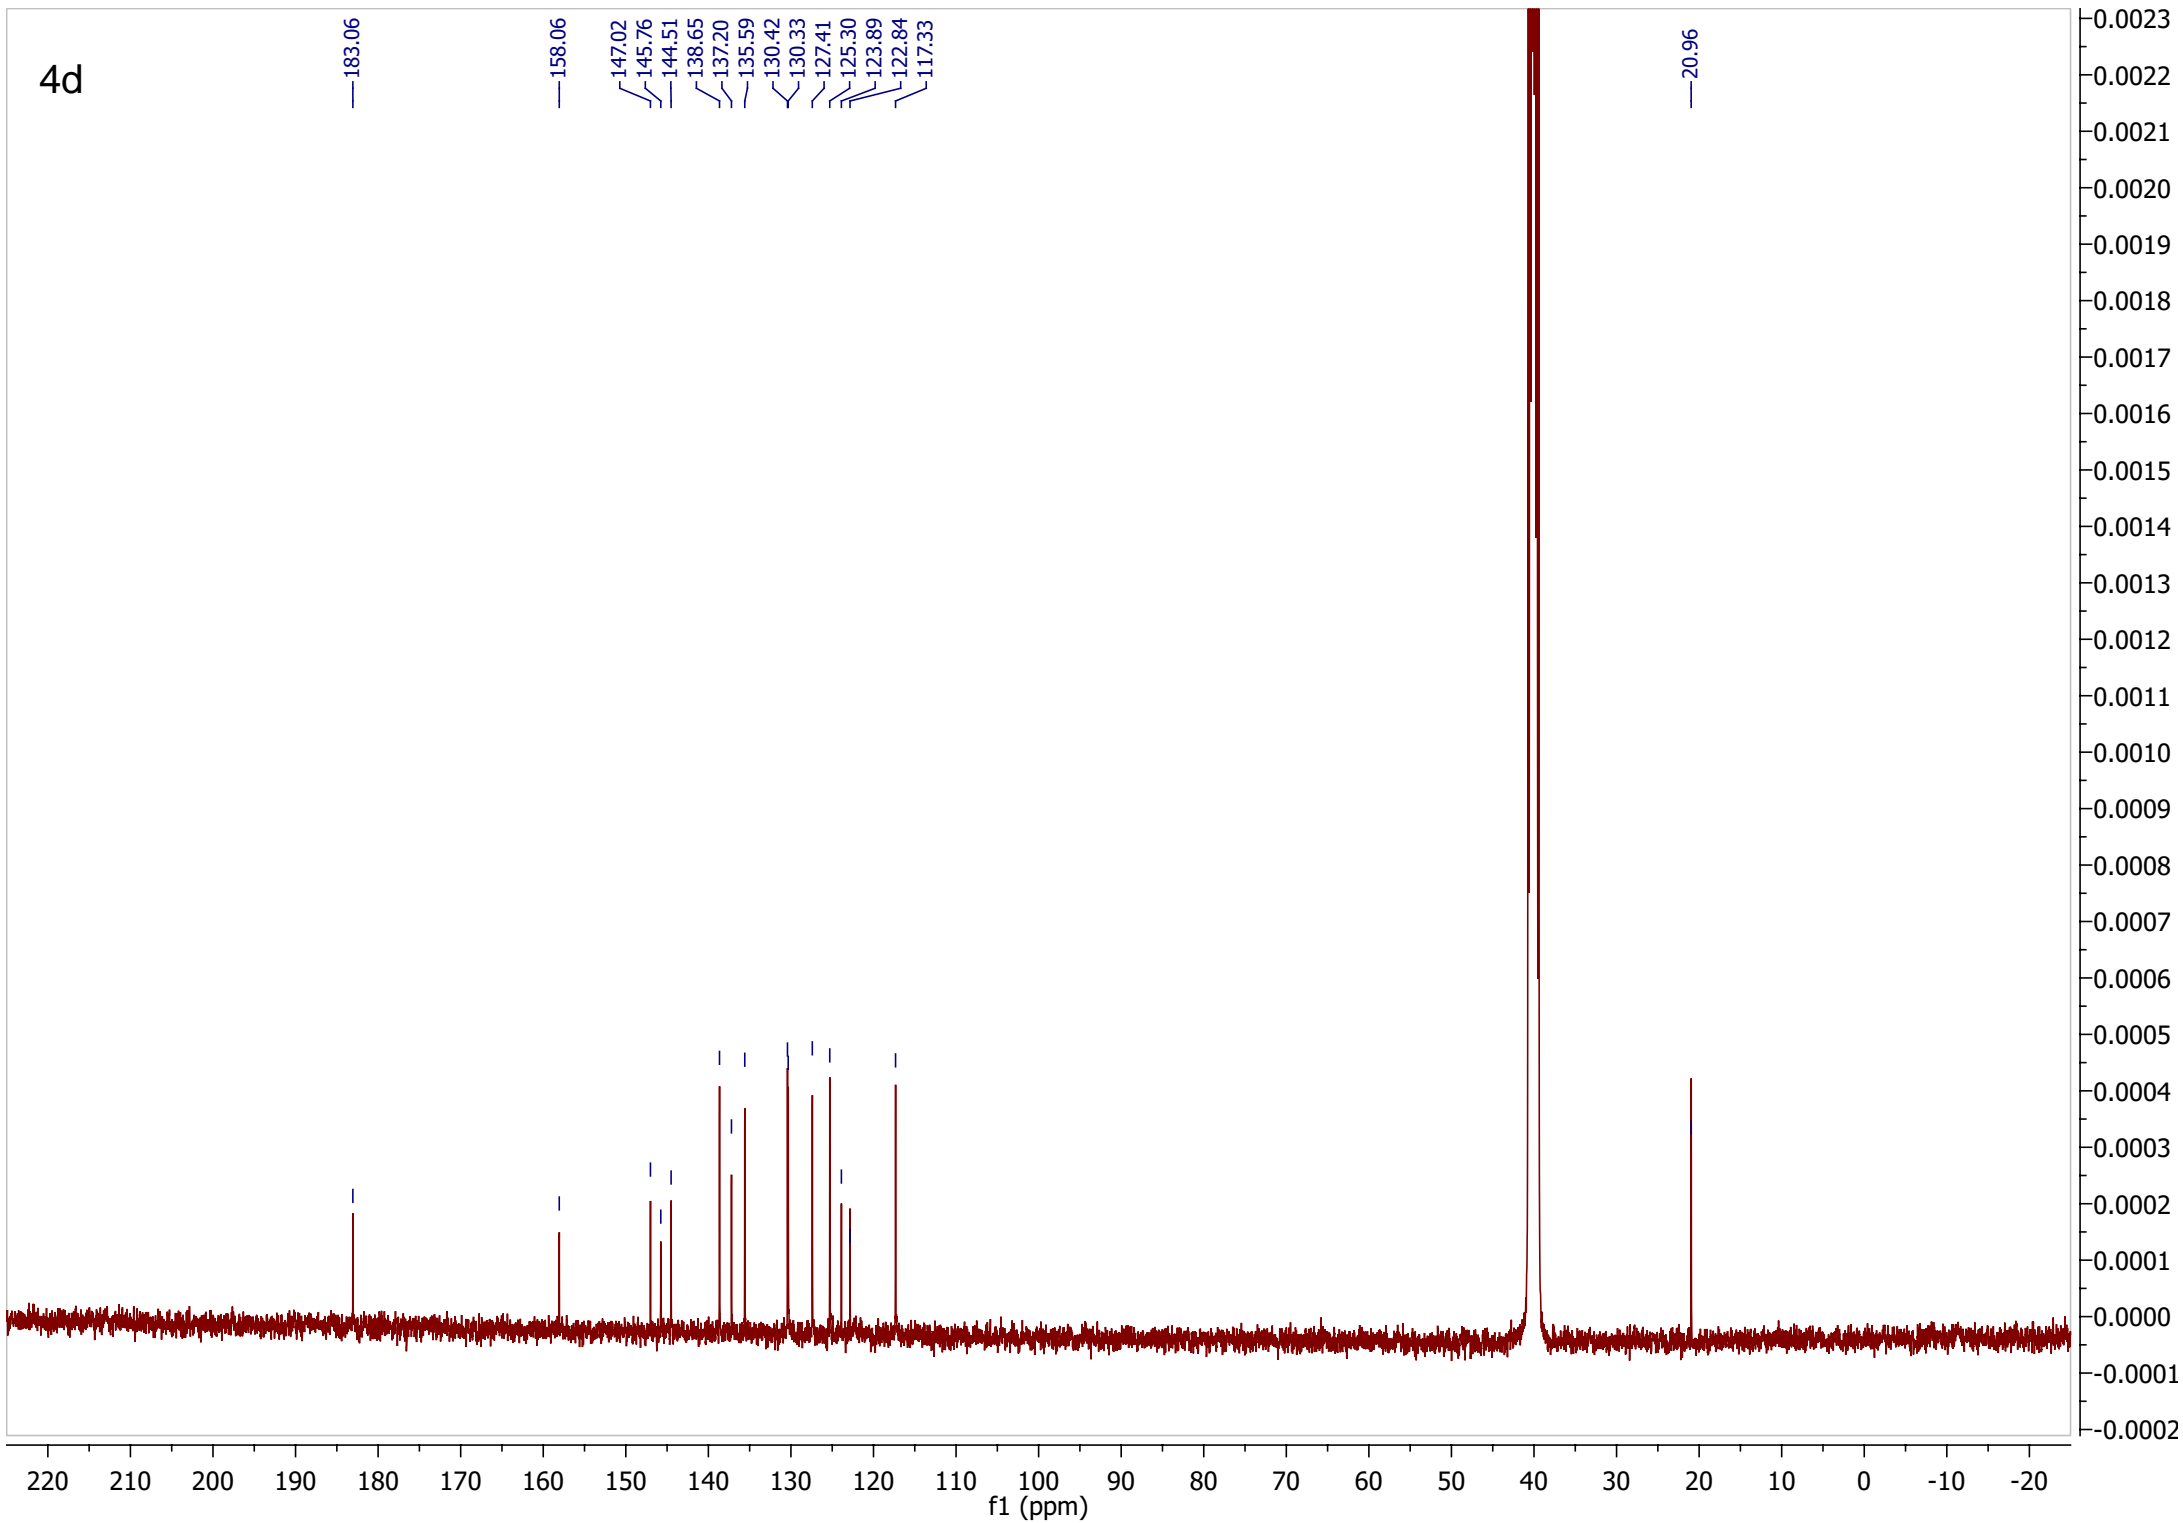

4e

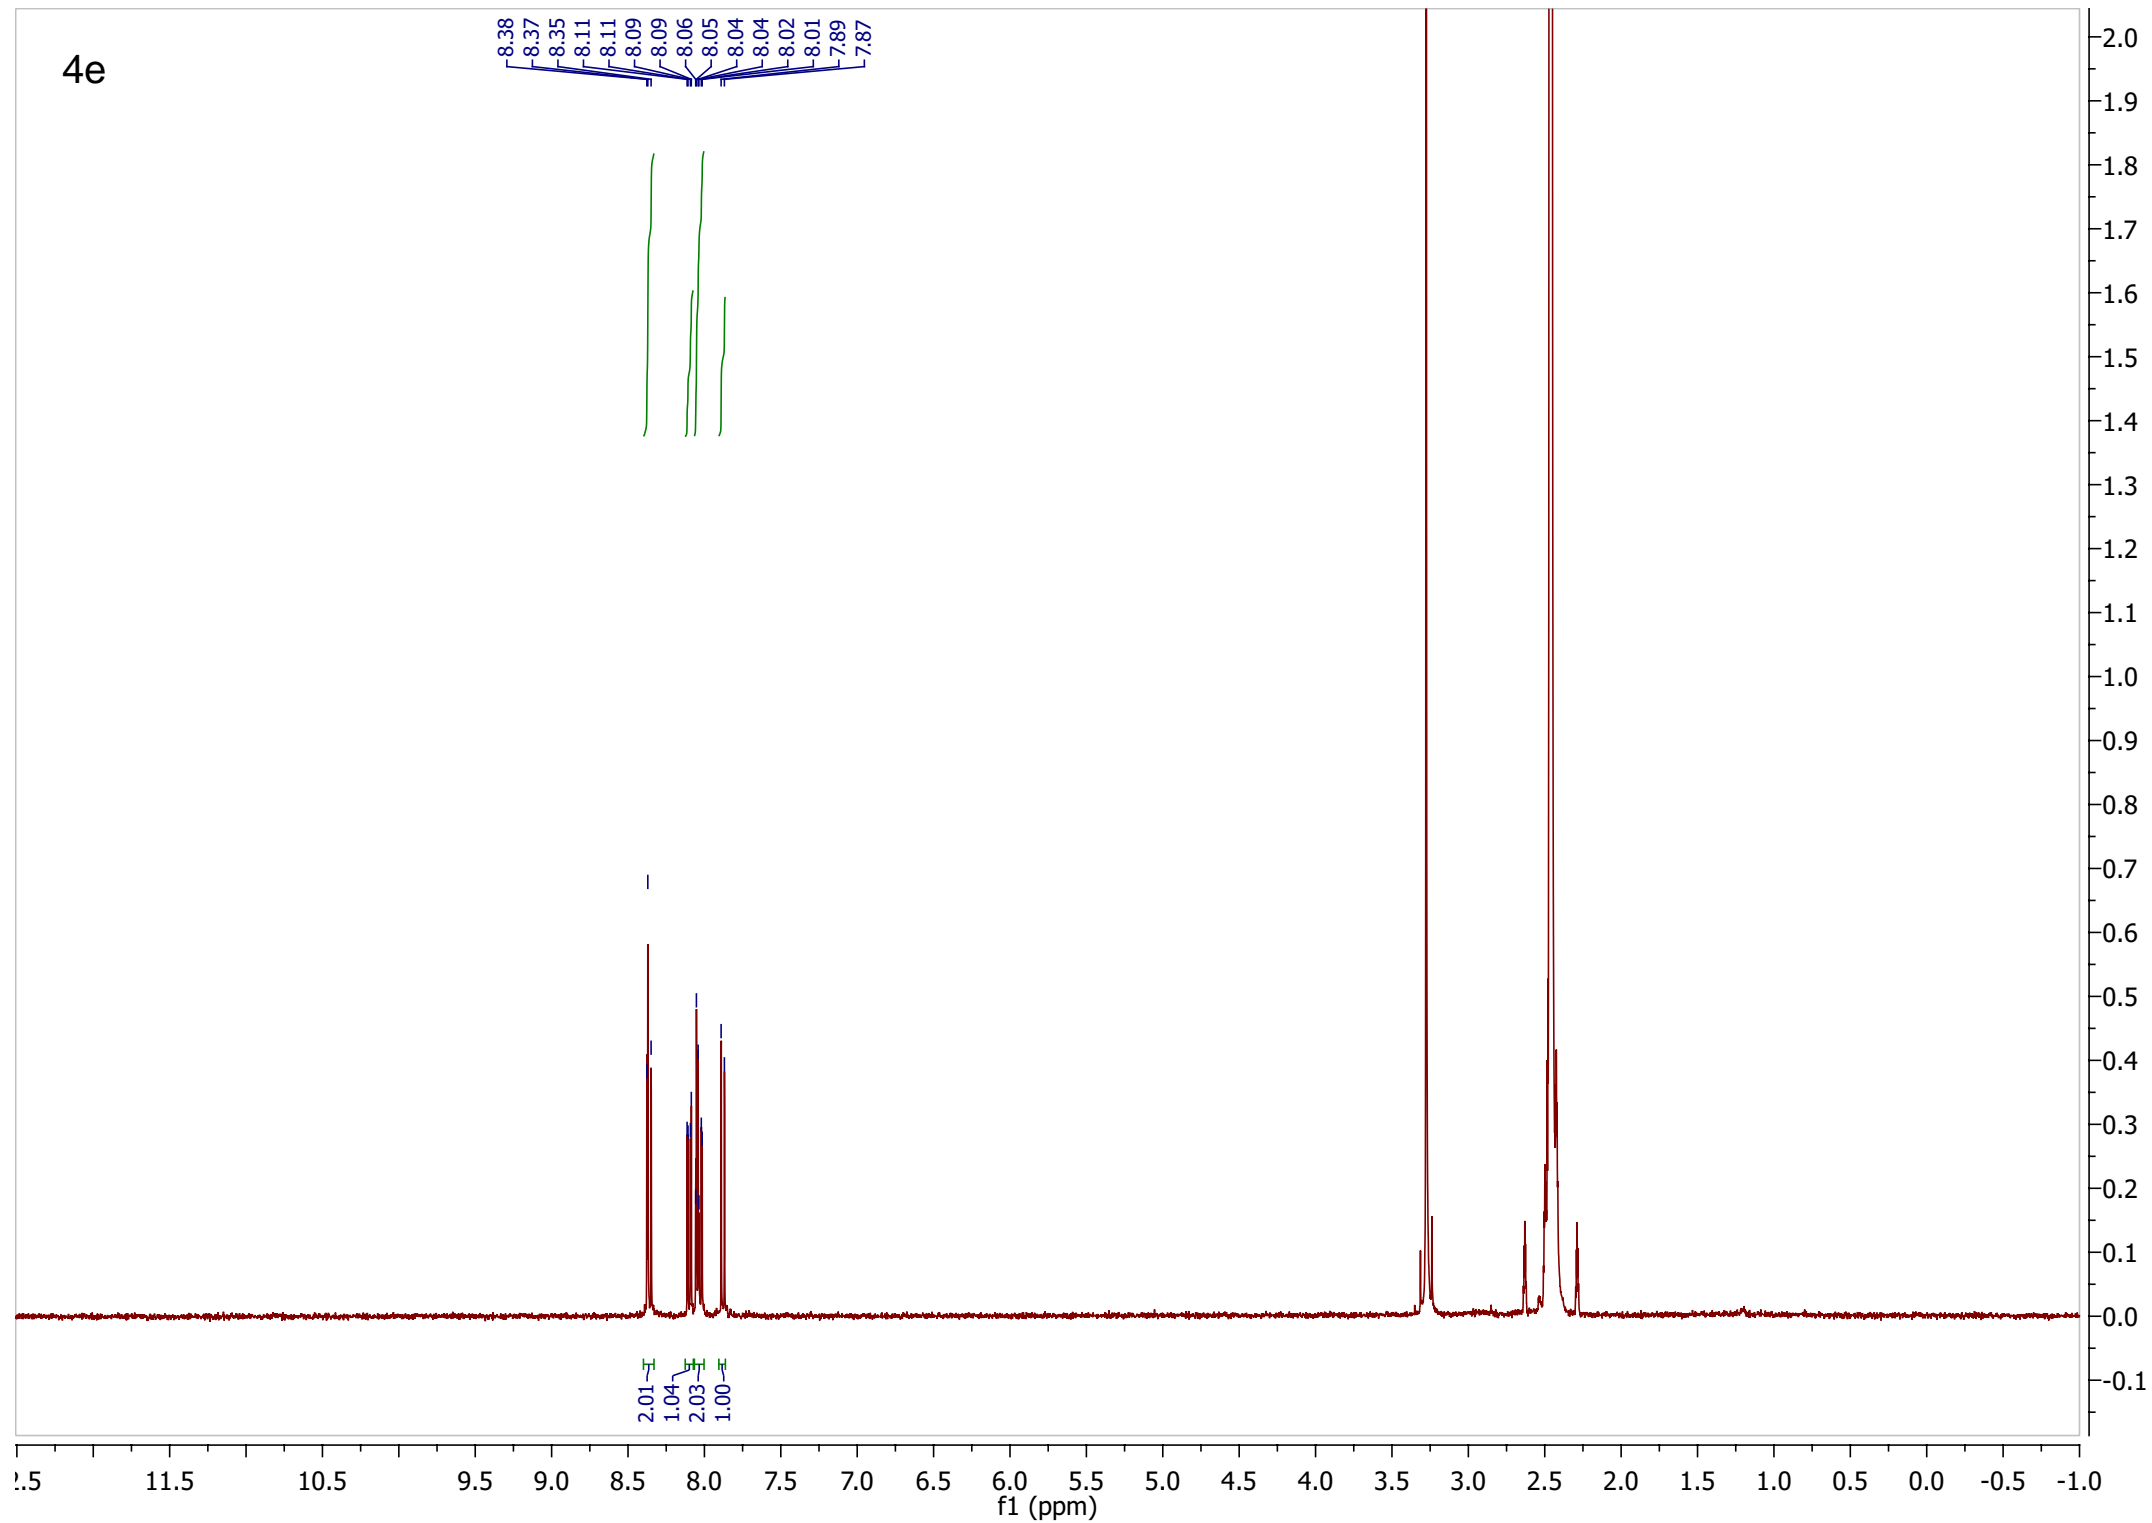

4e

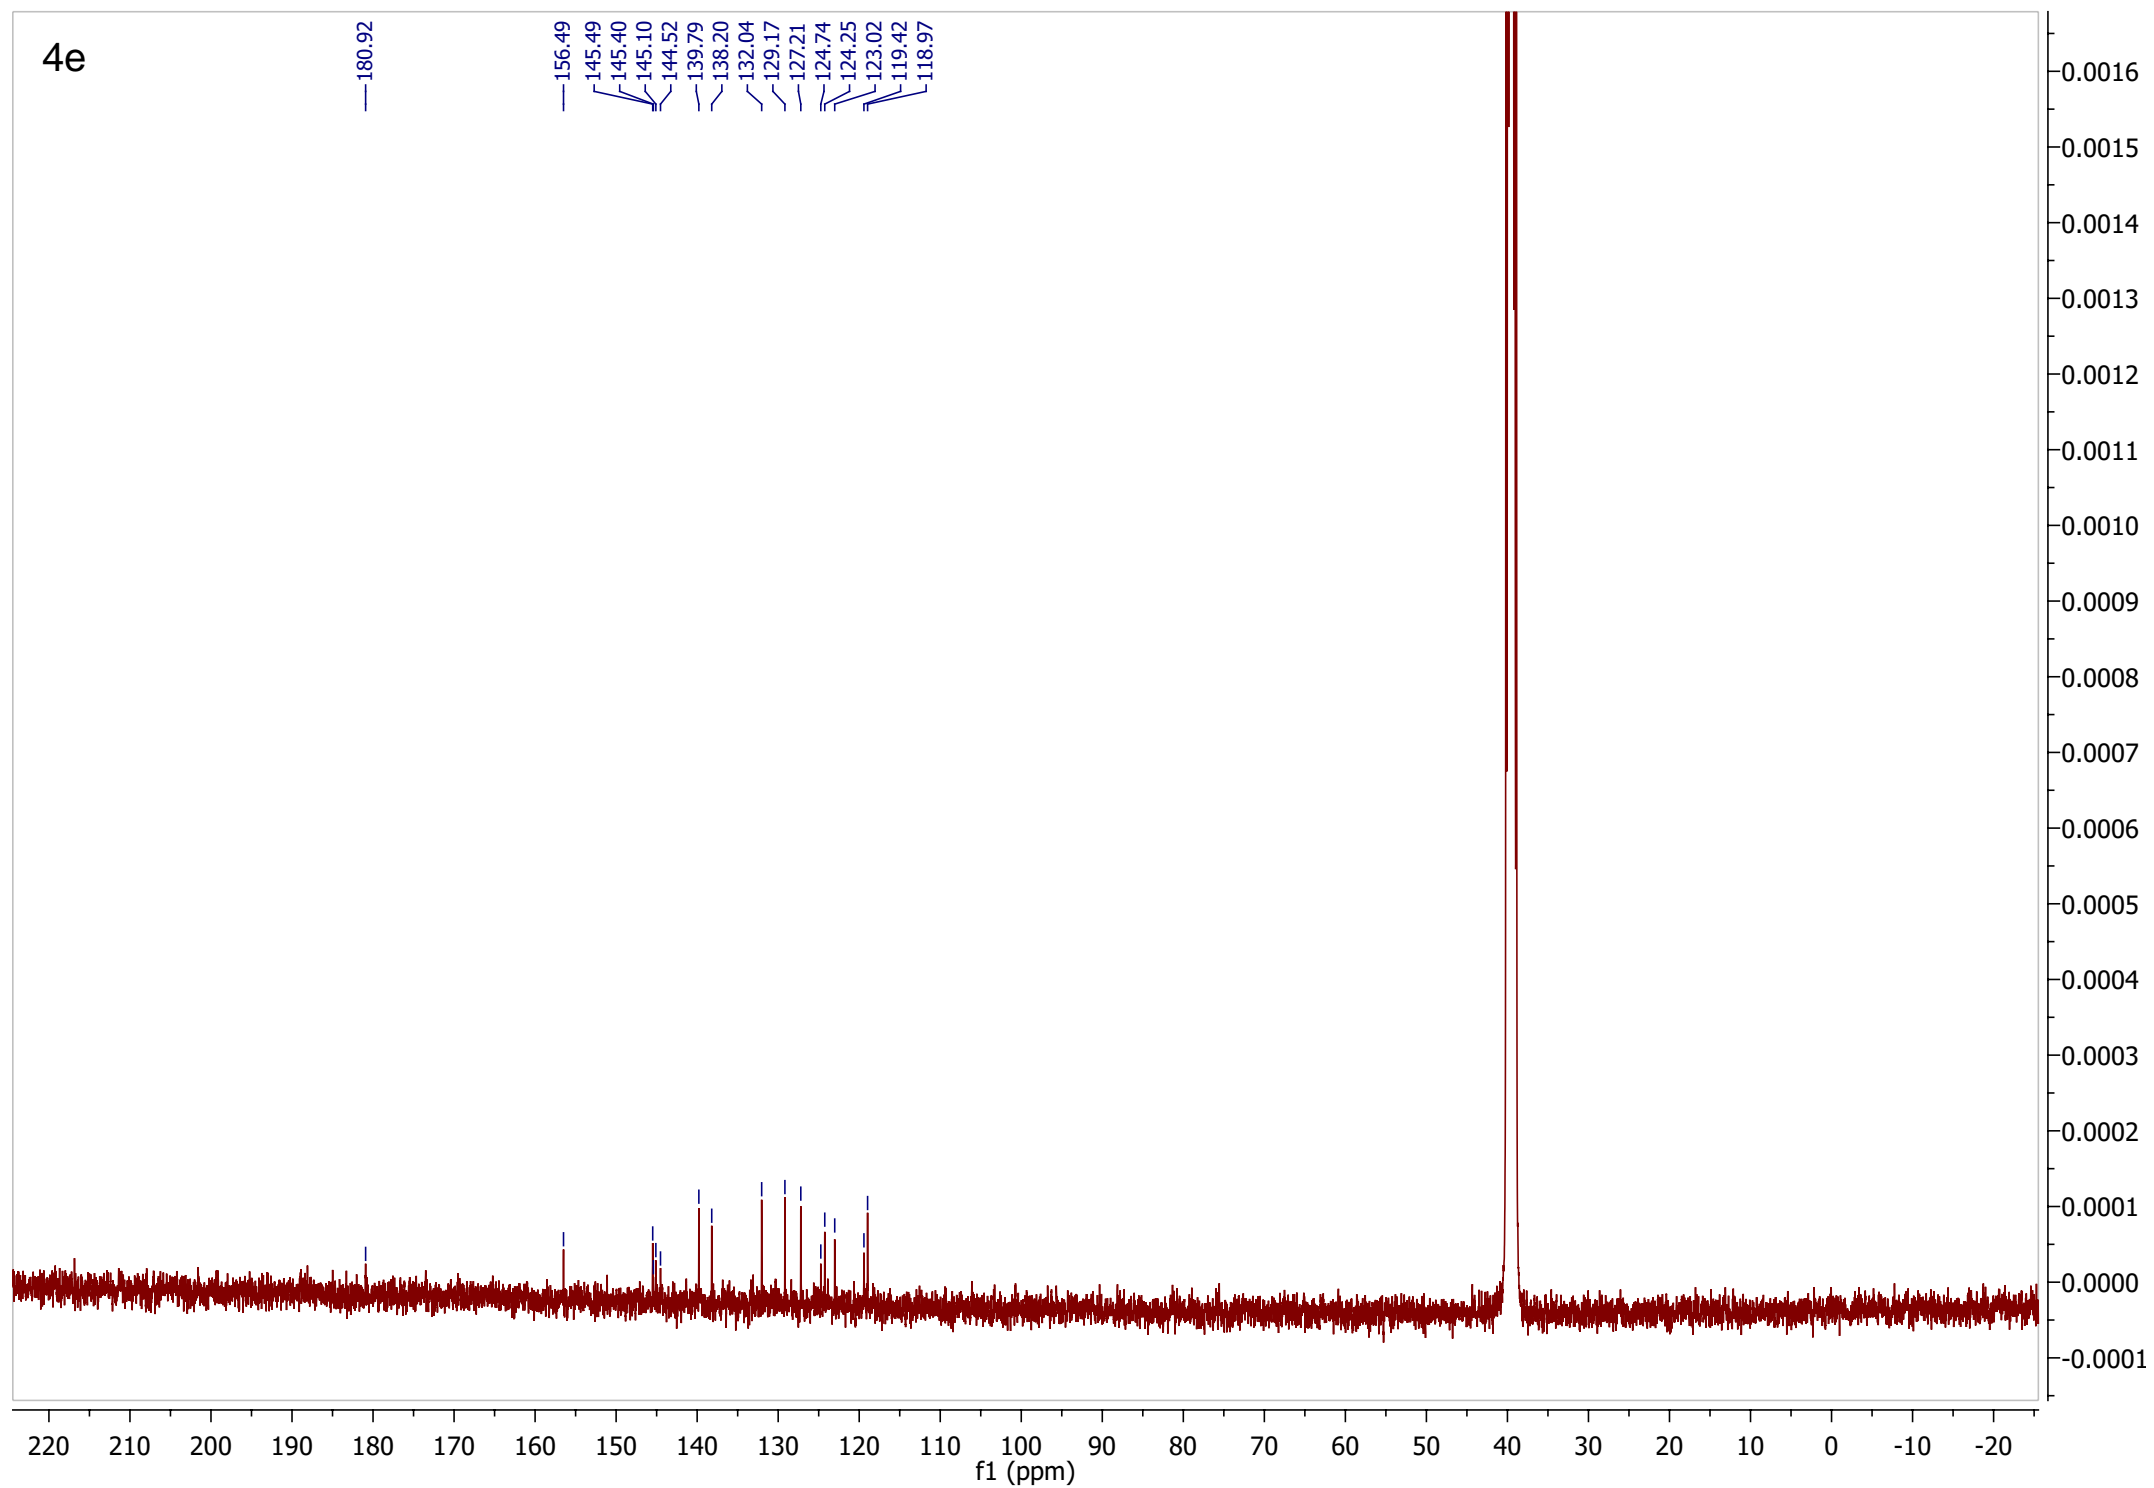



4f

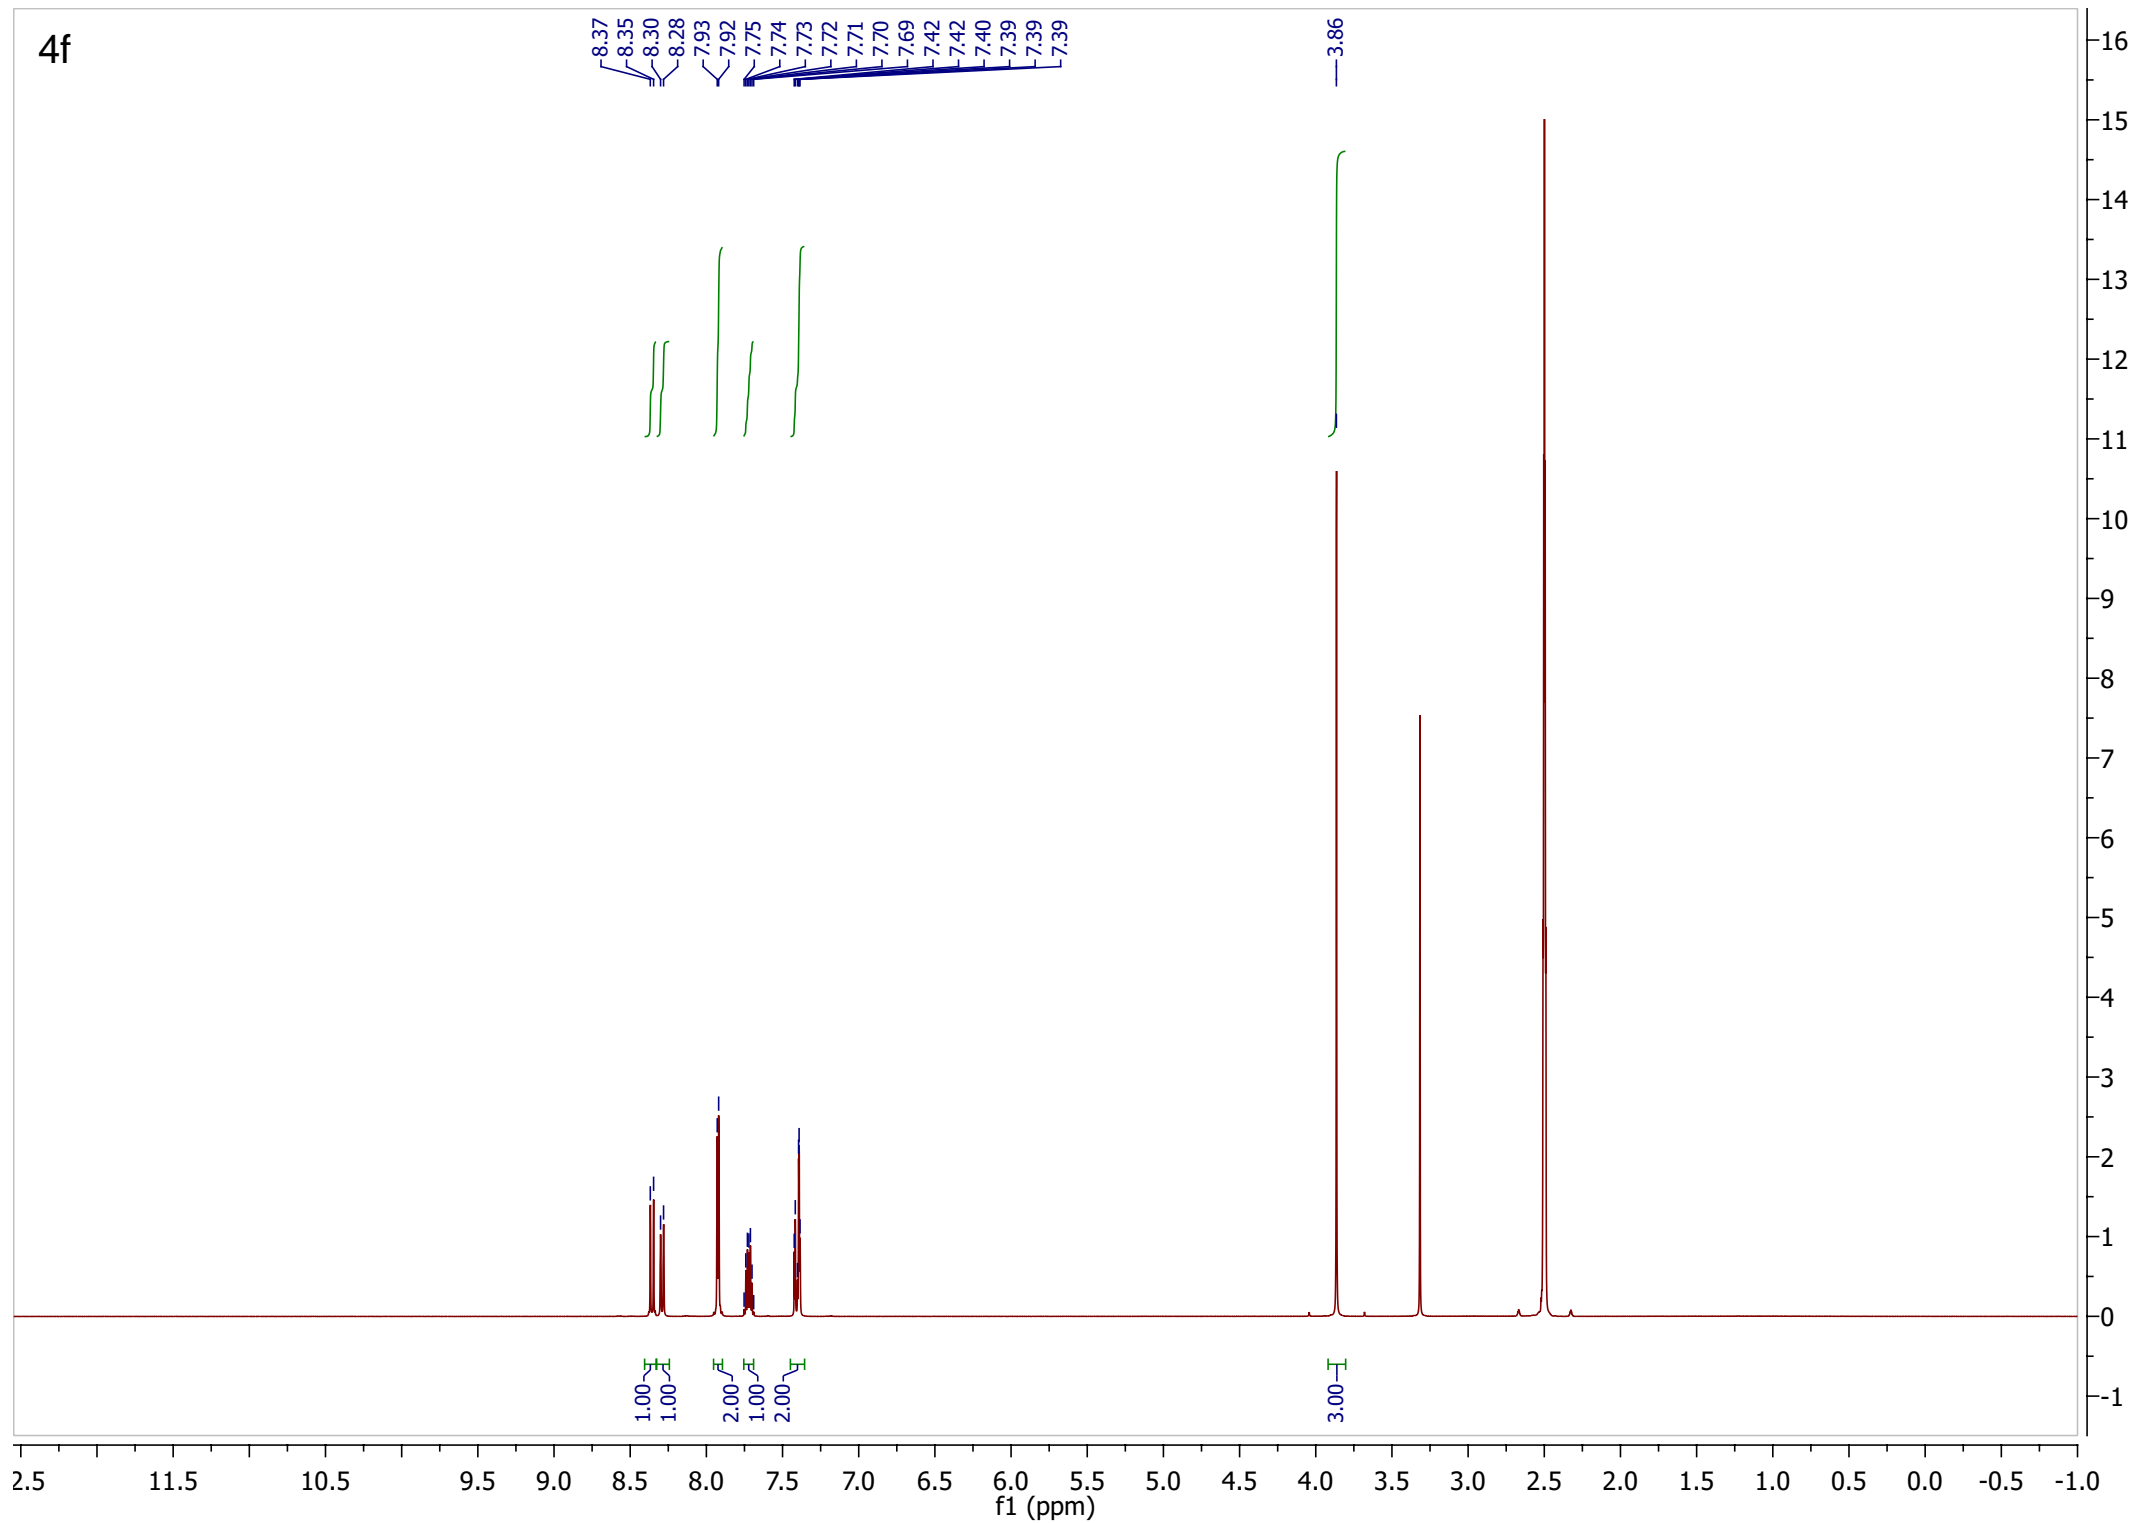

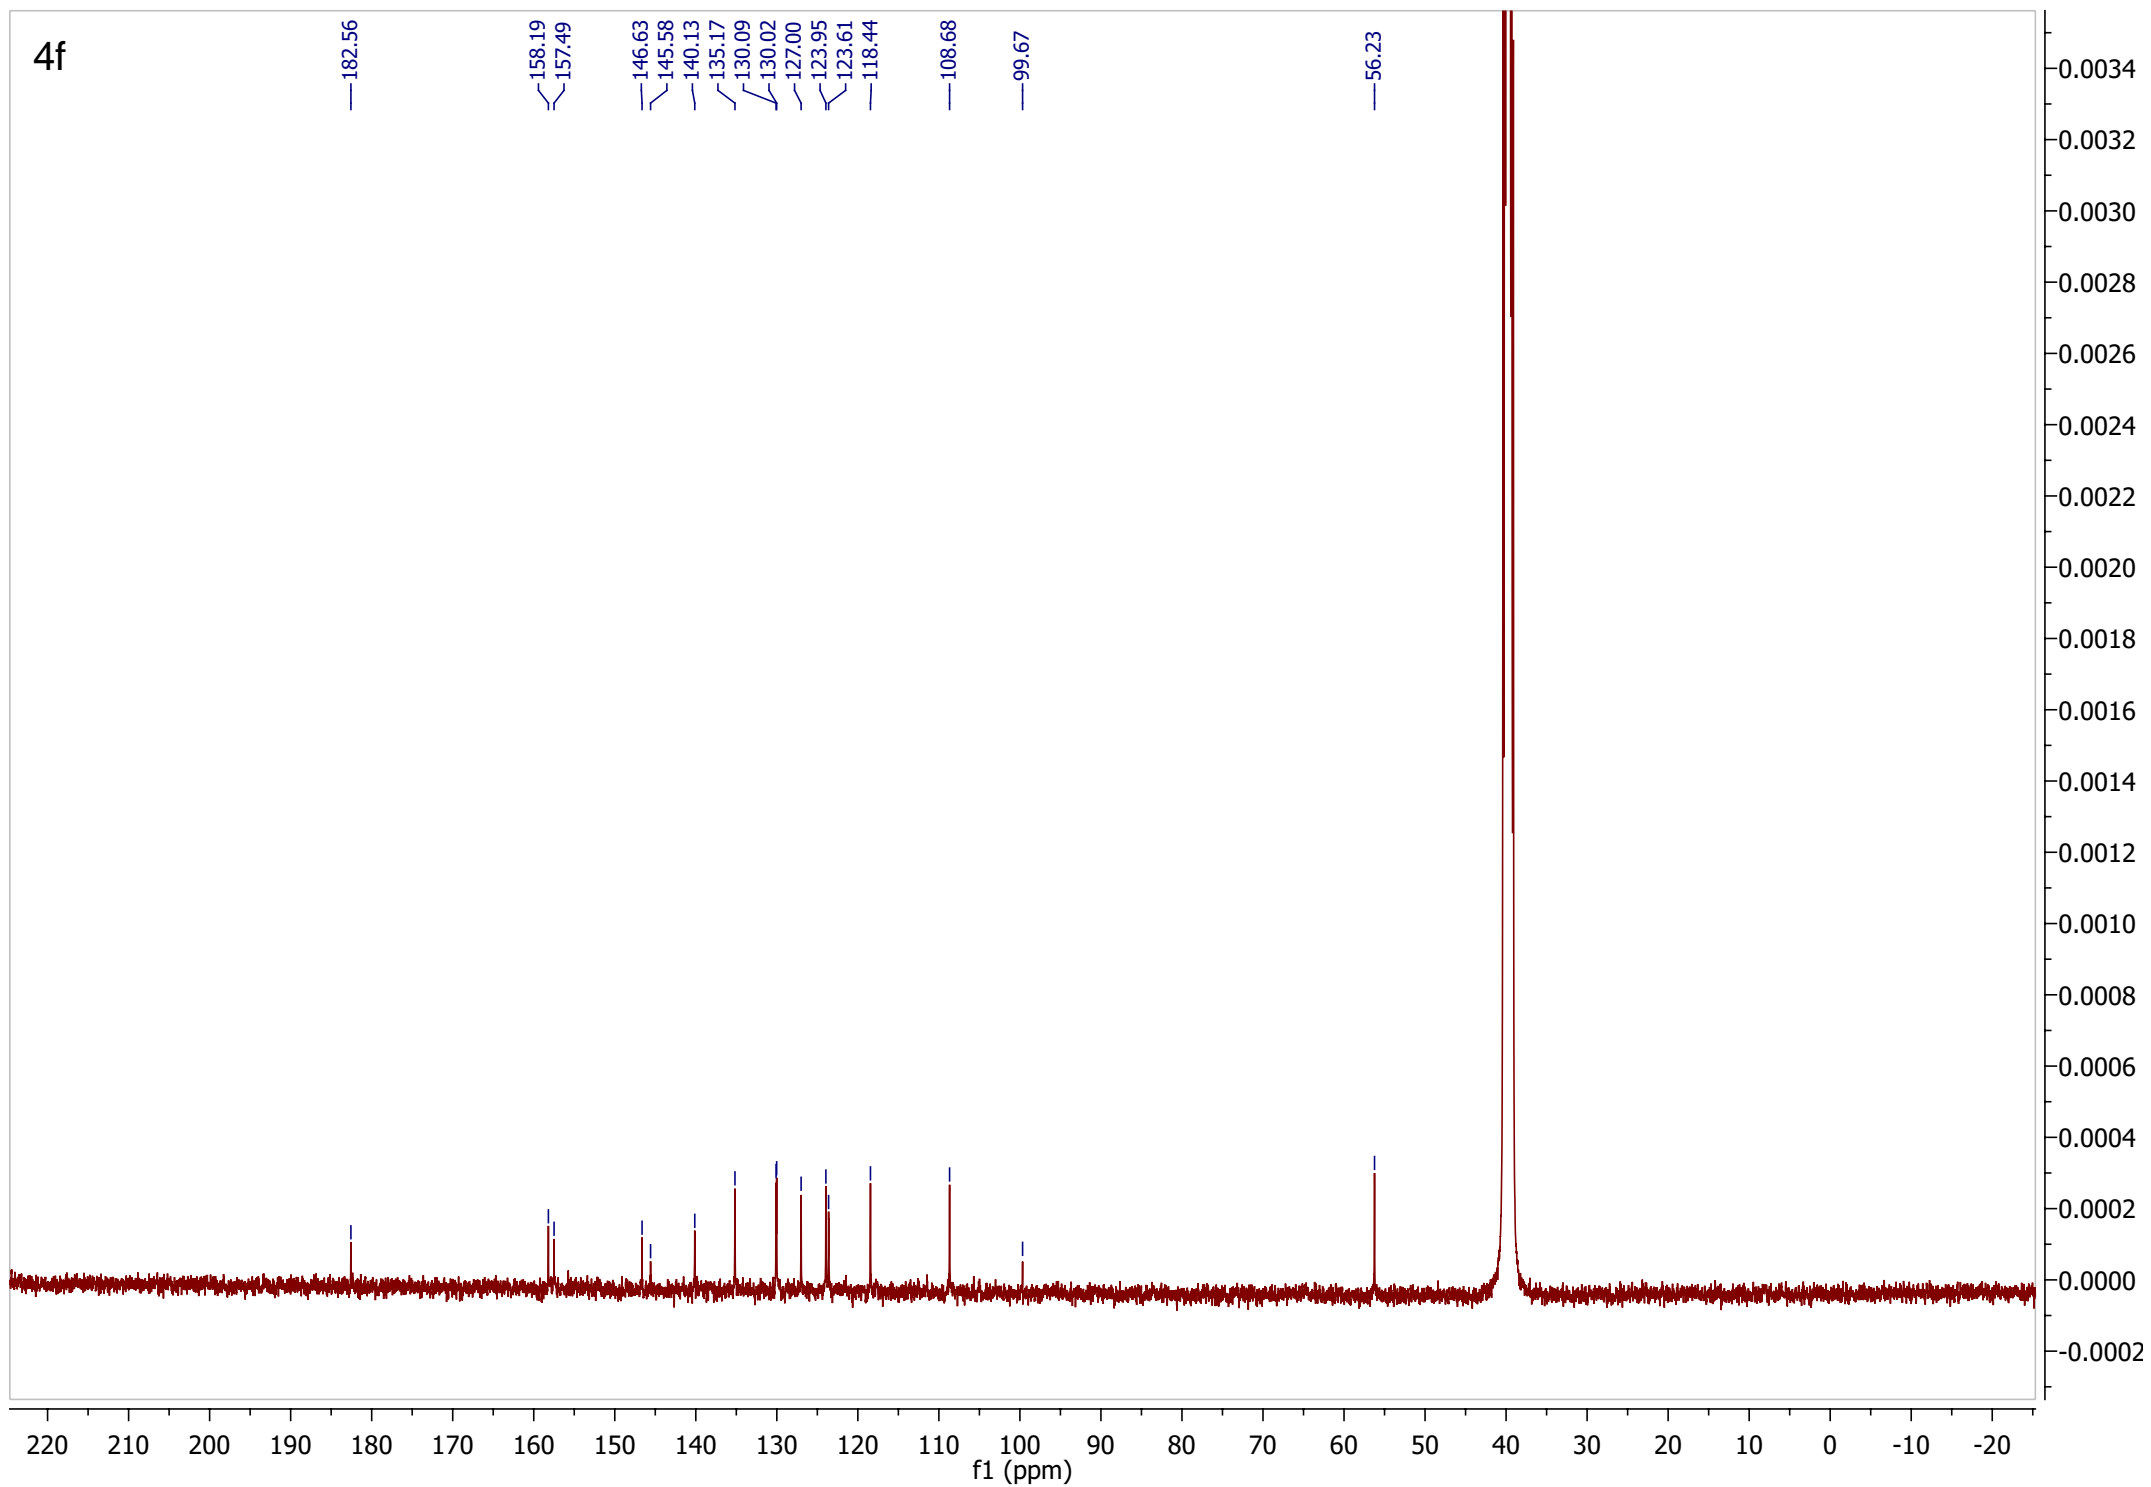

7a

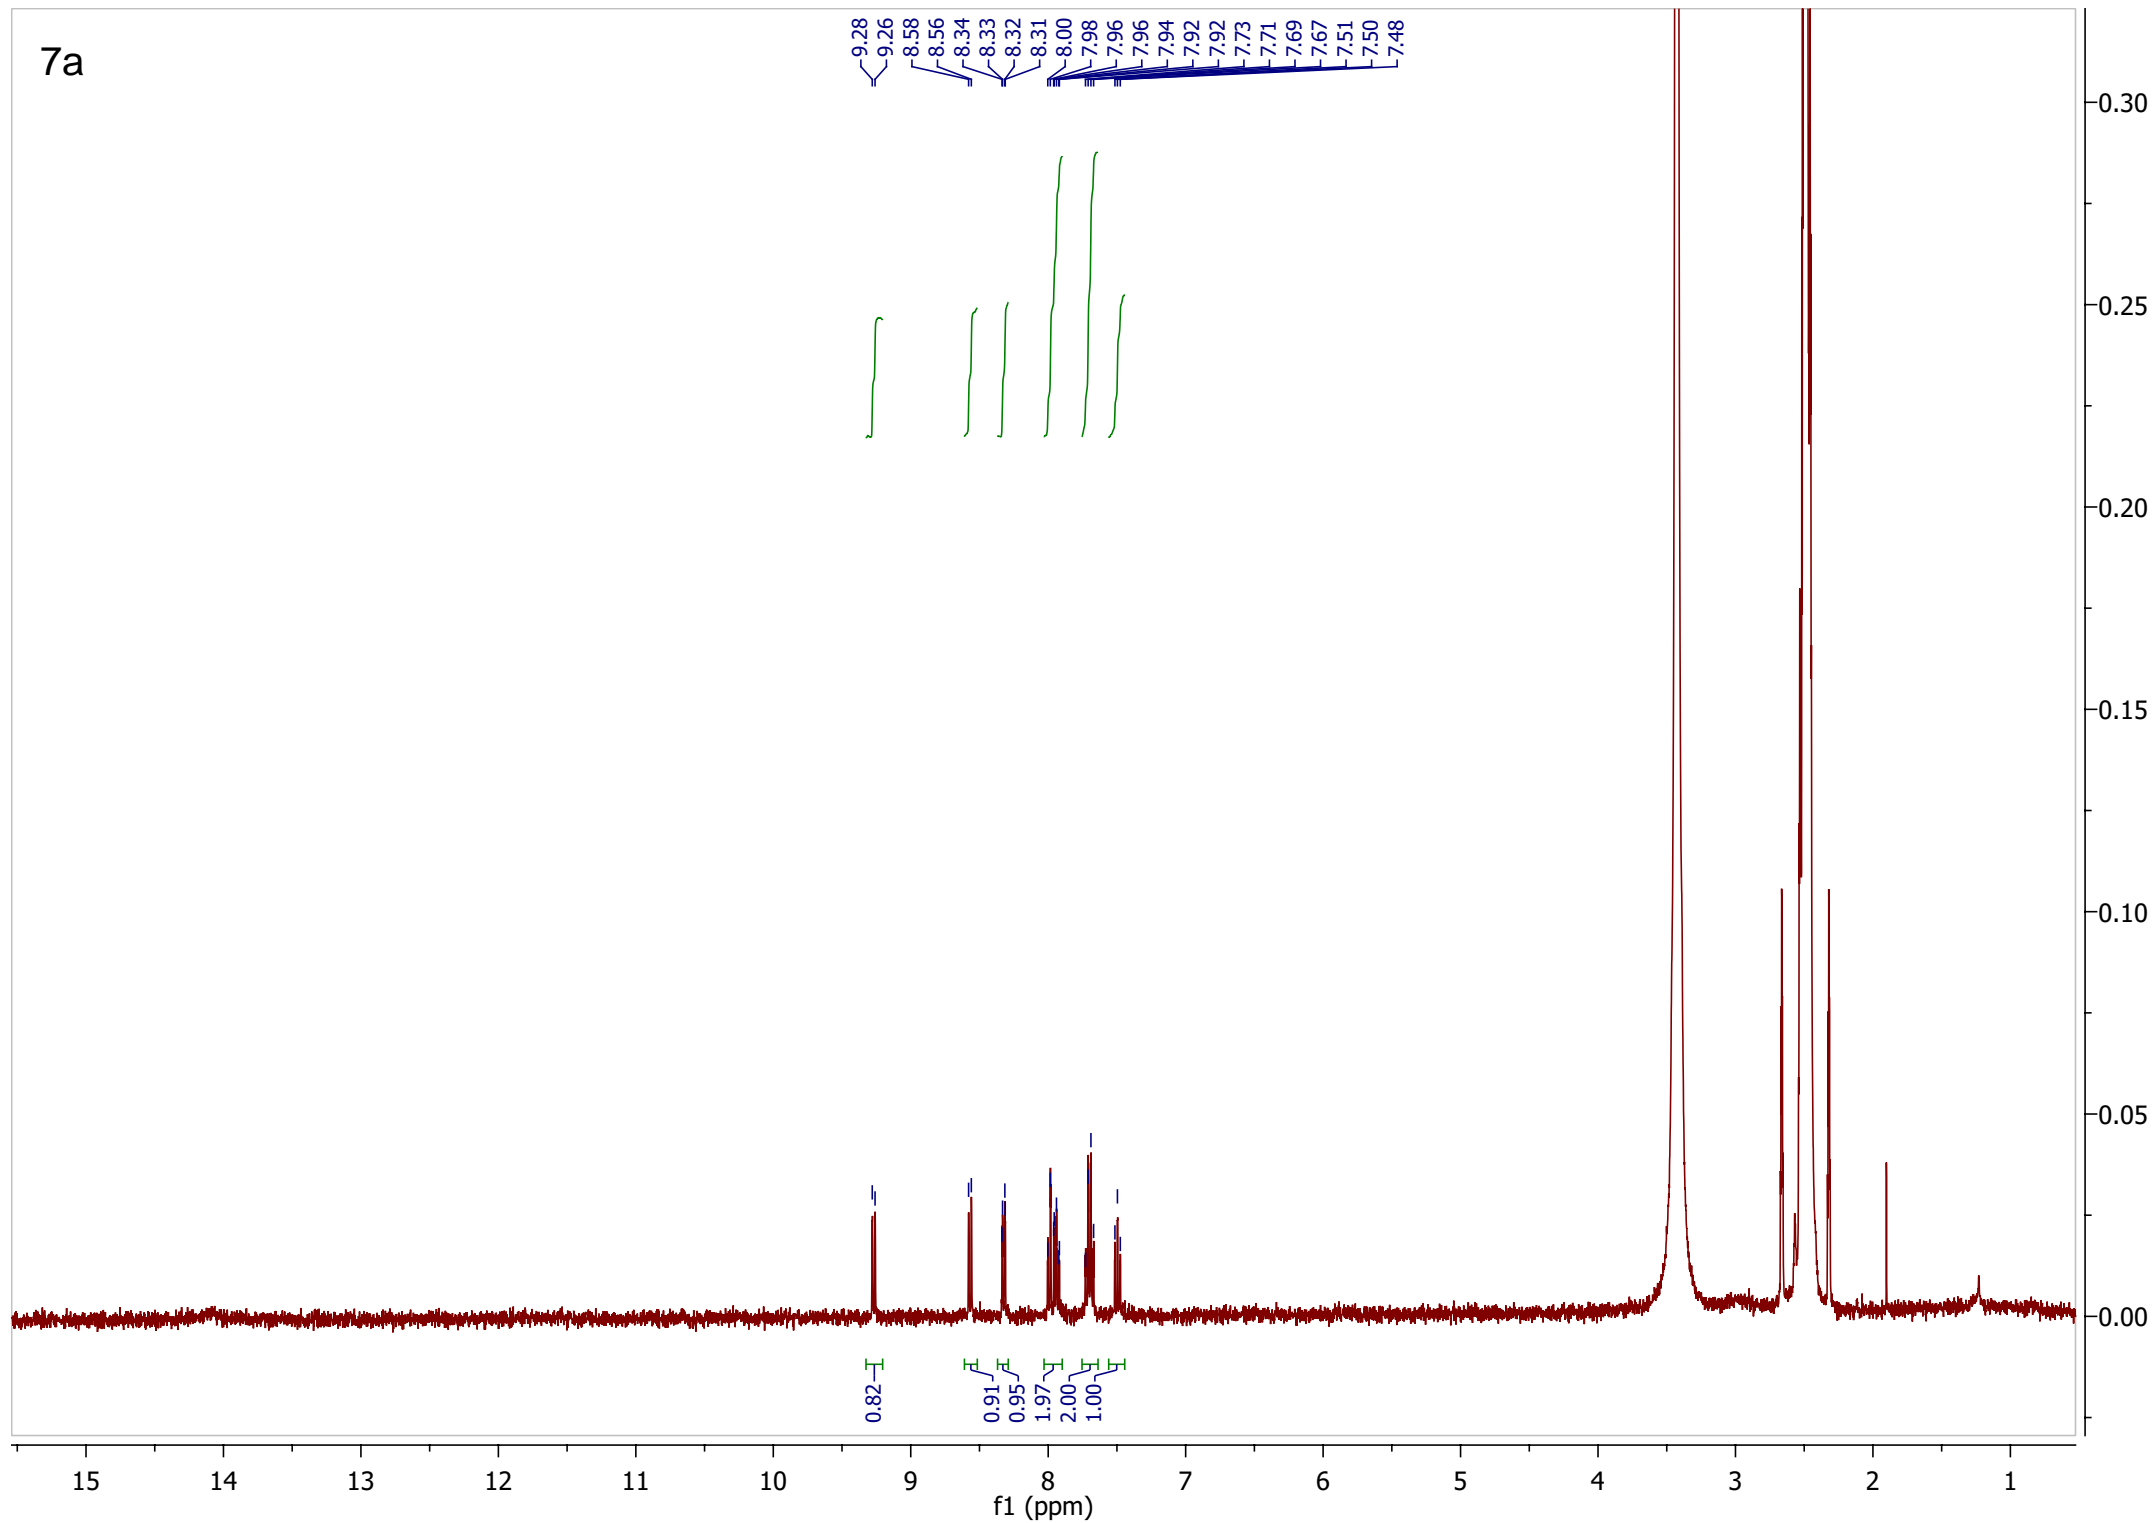

7b

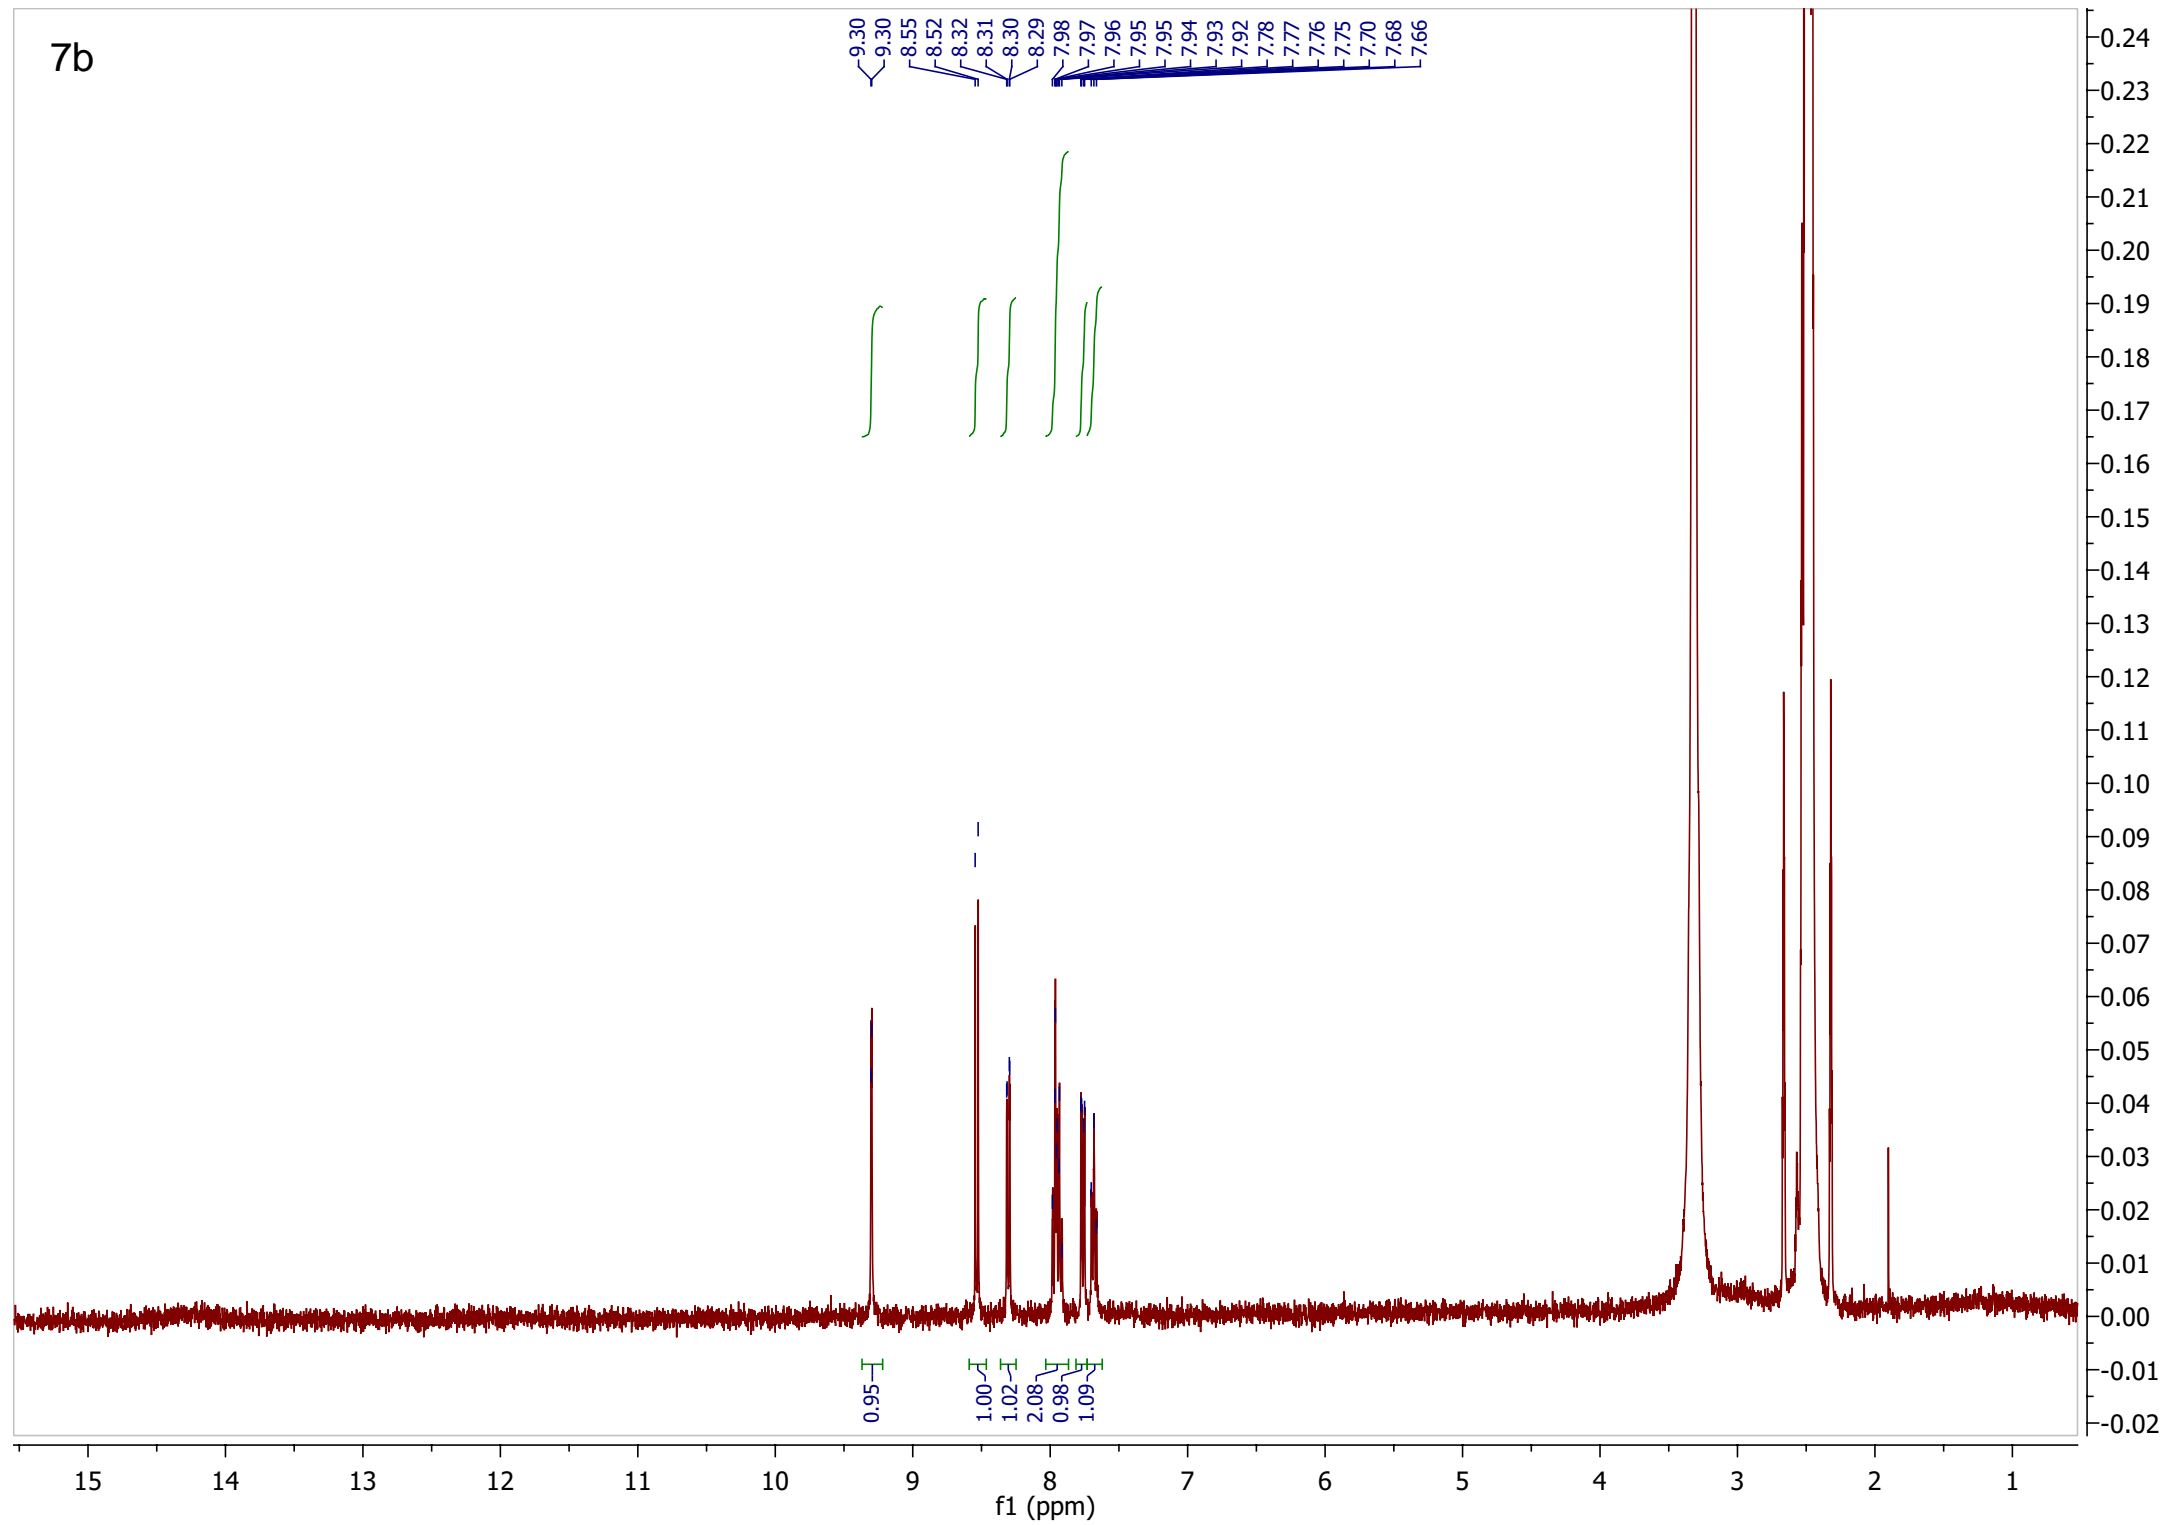

7c

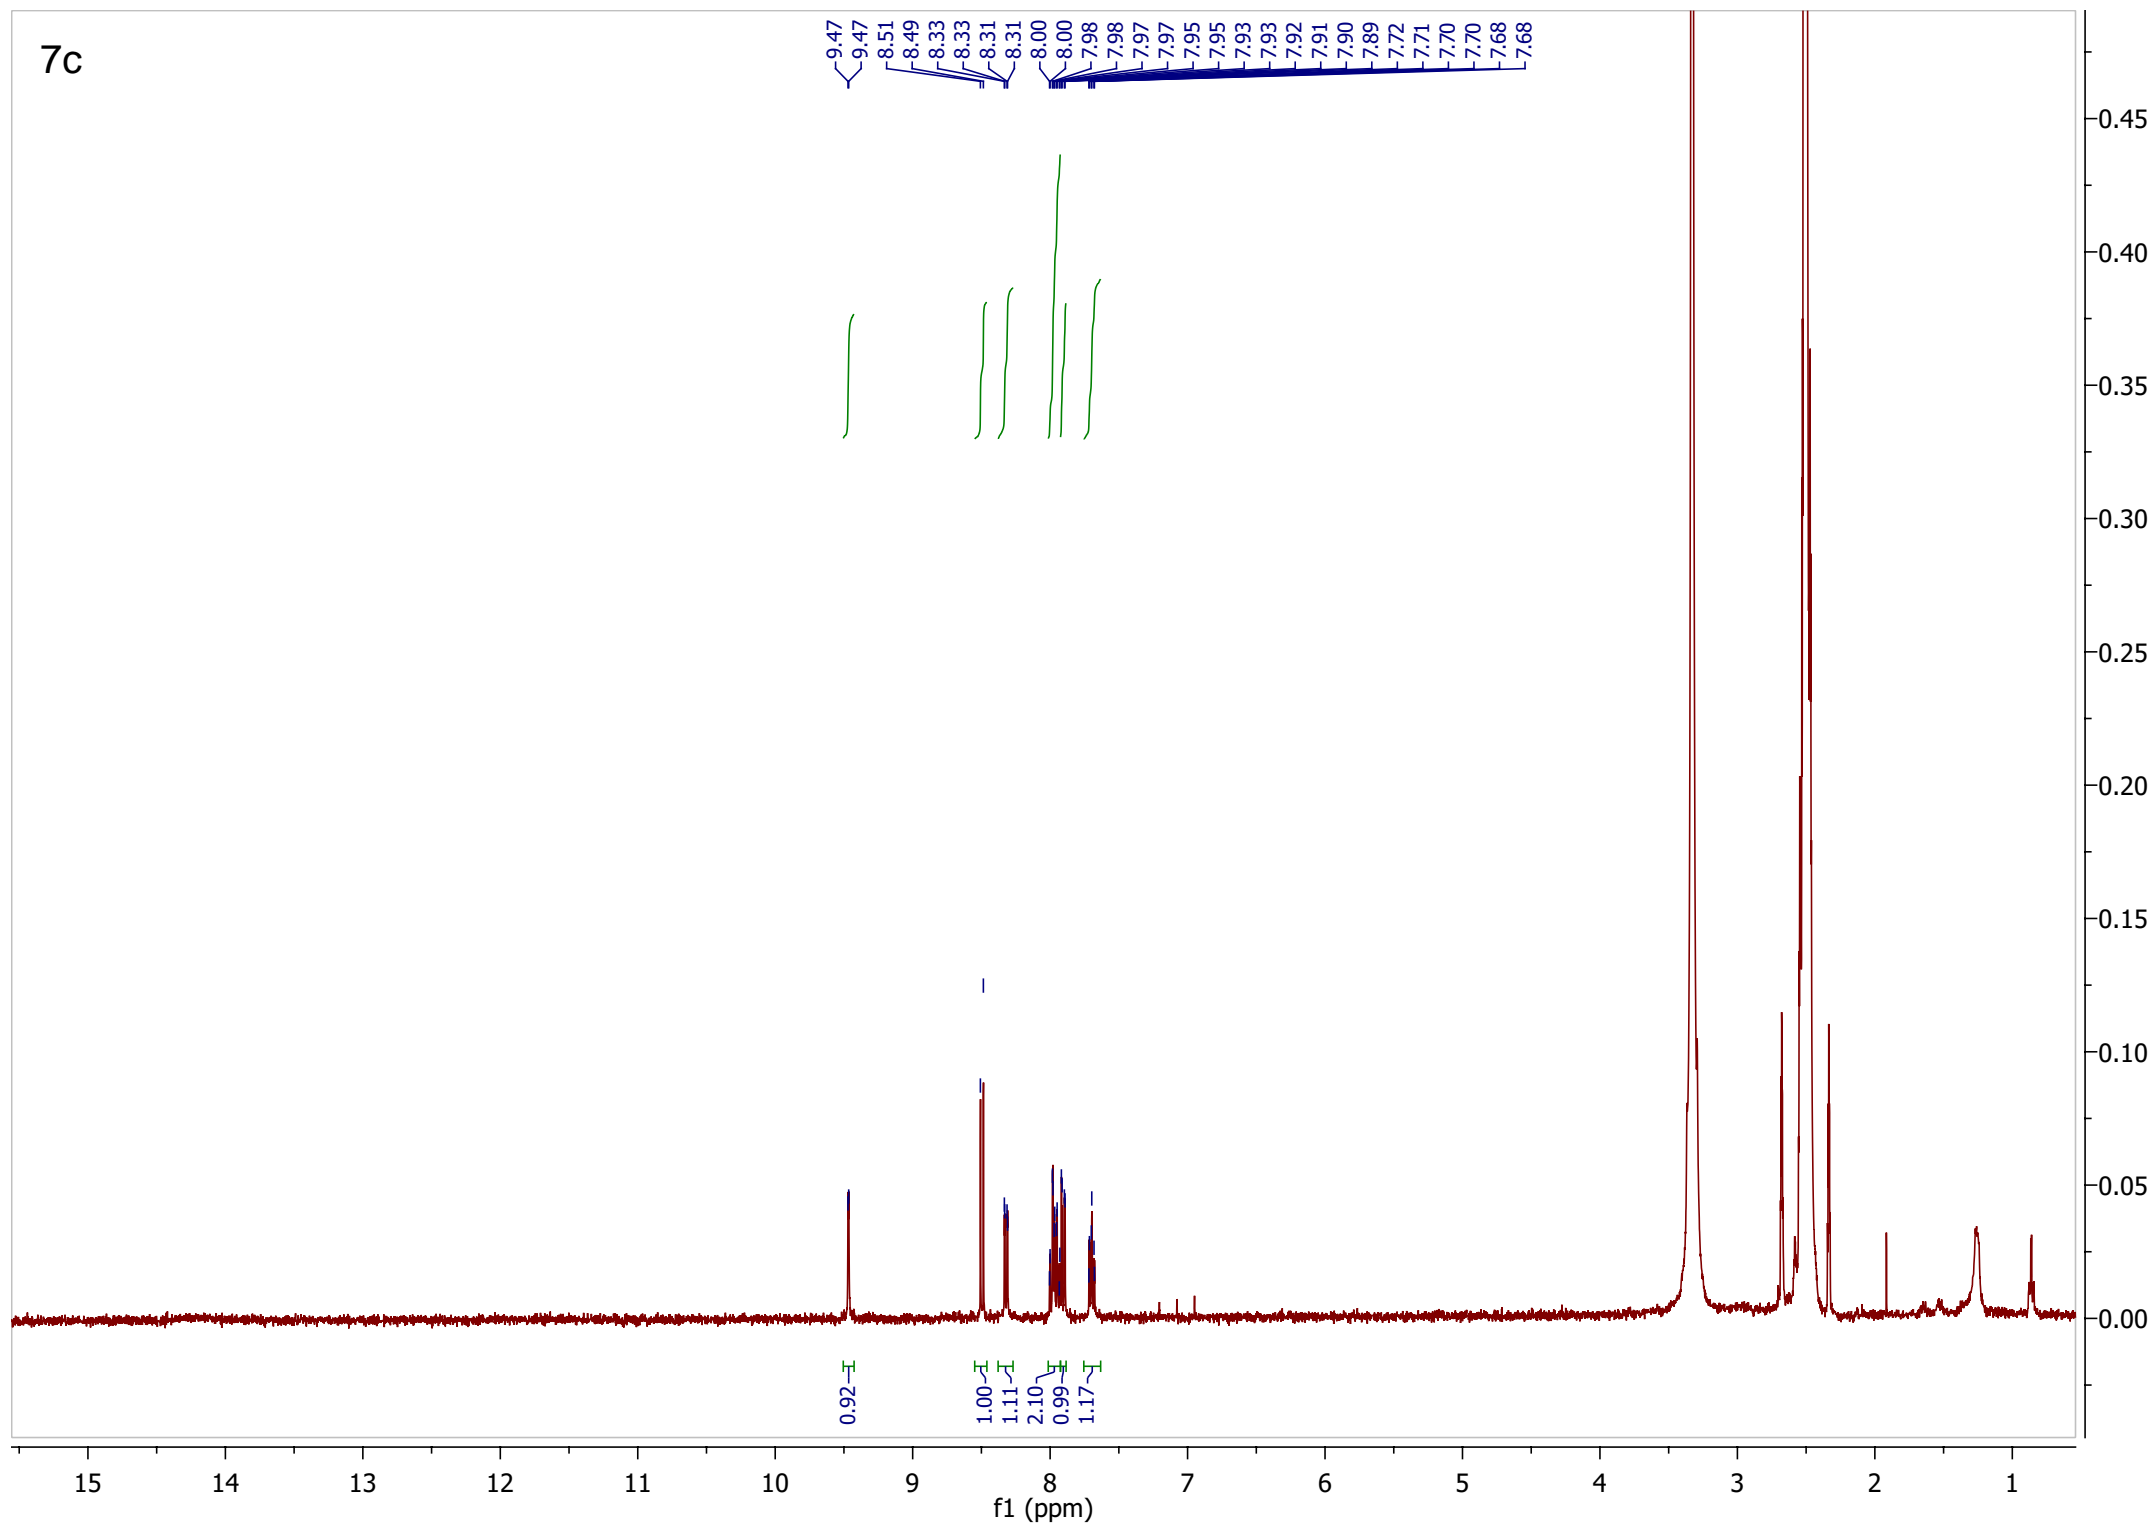

7d

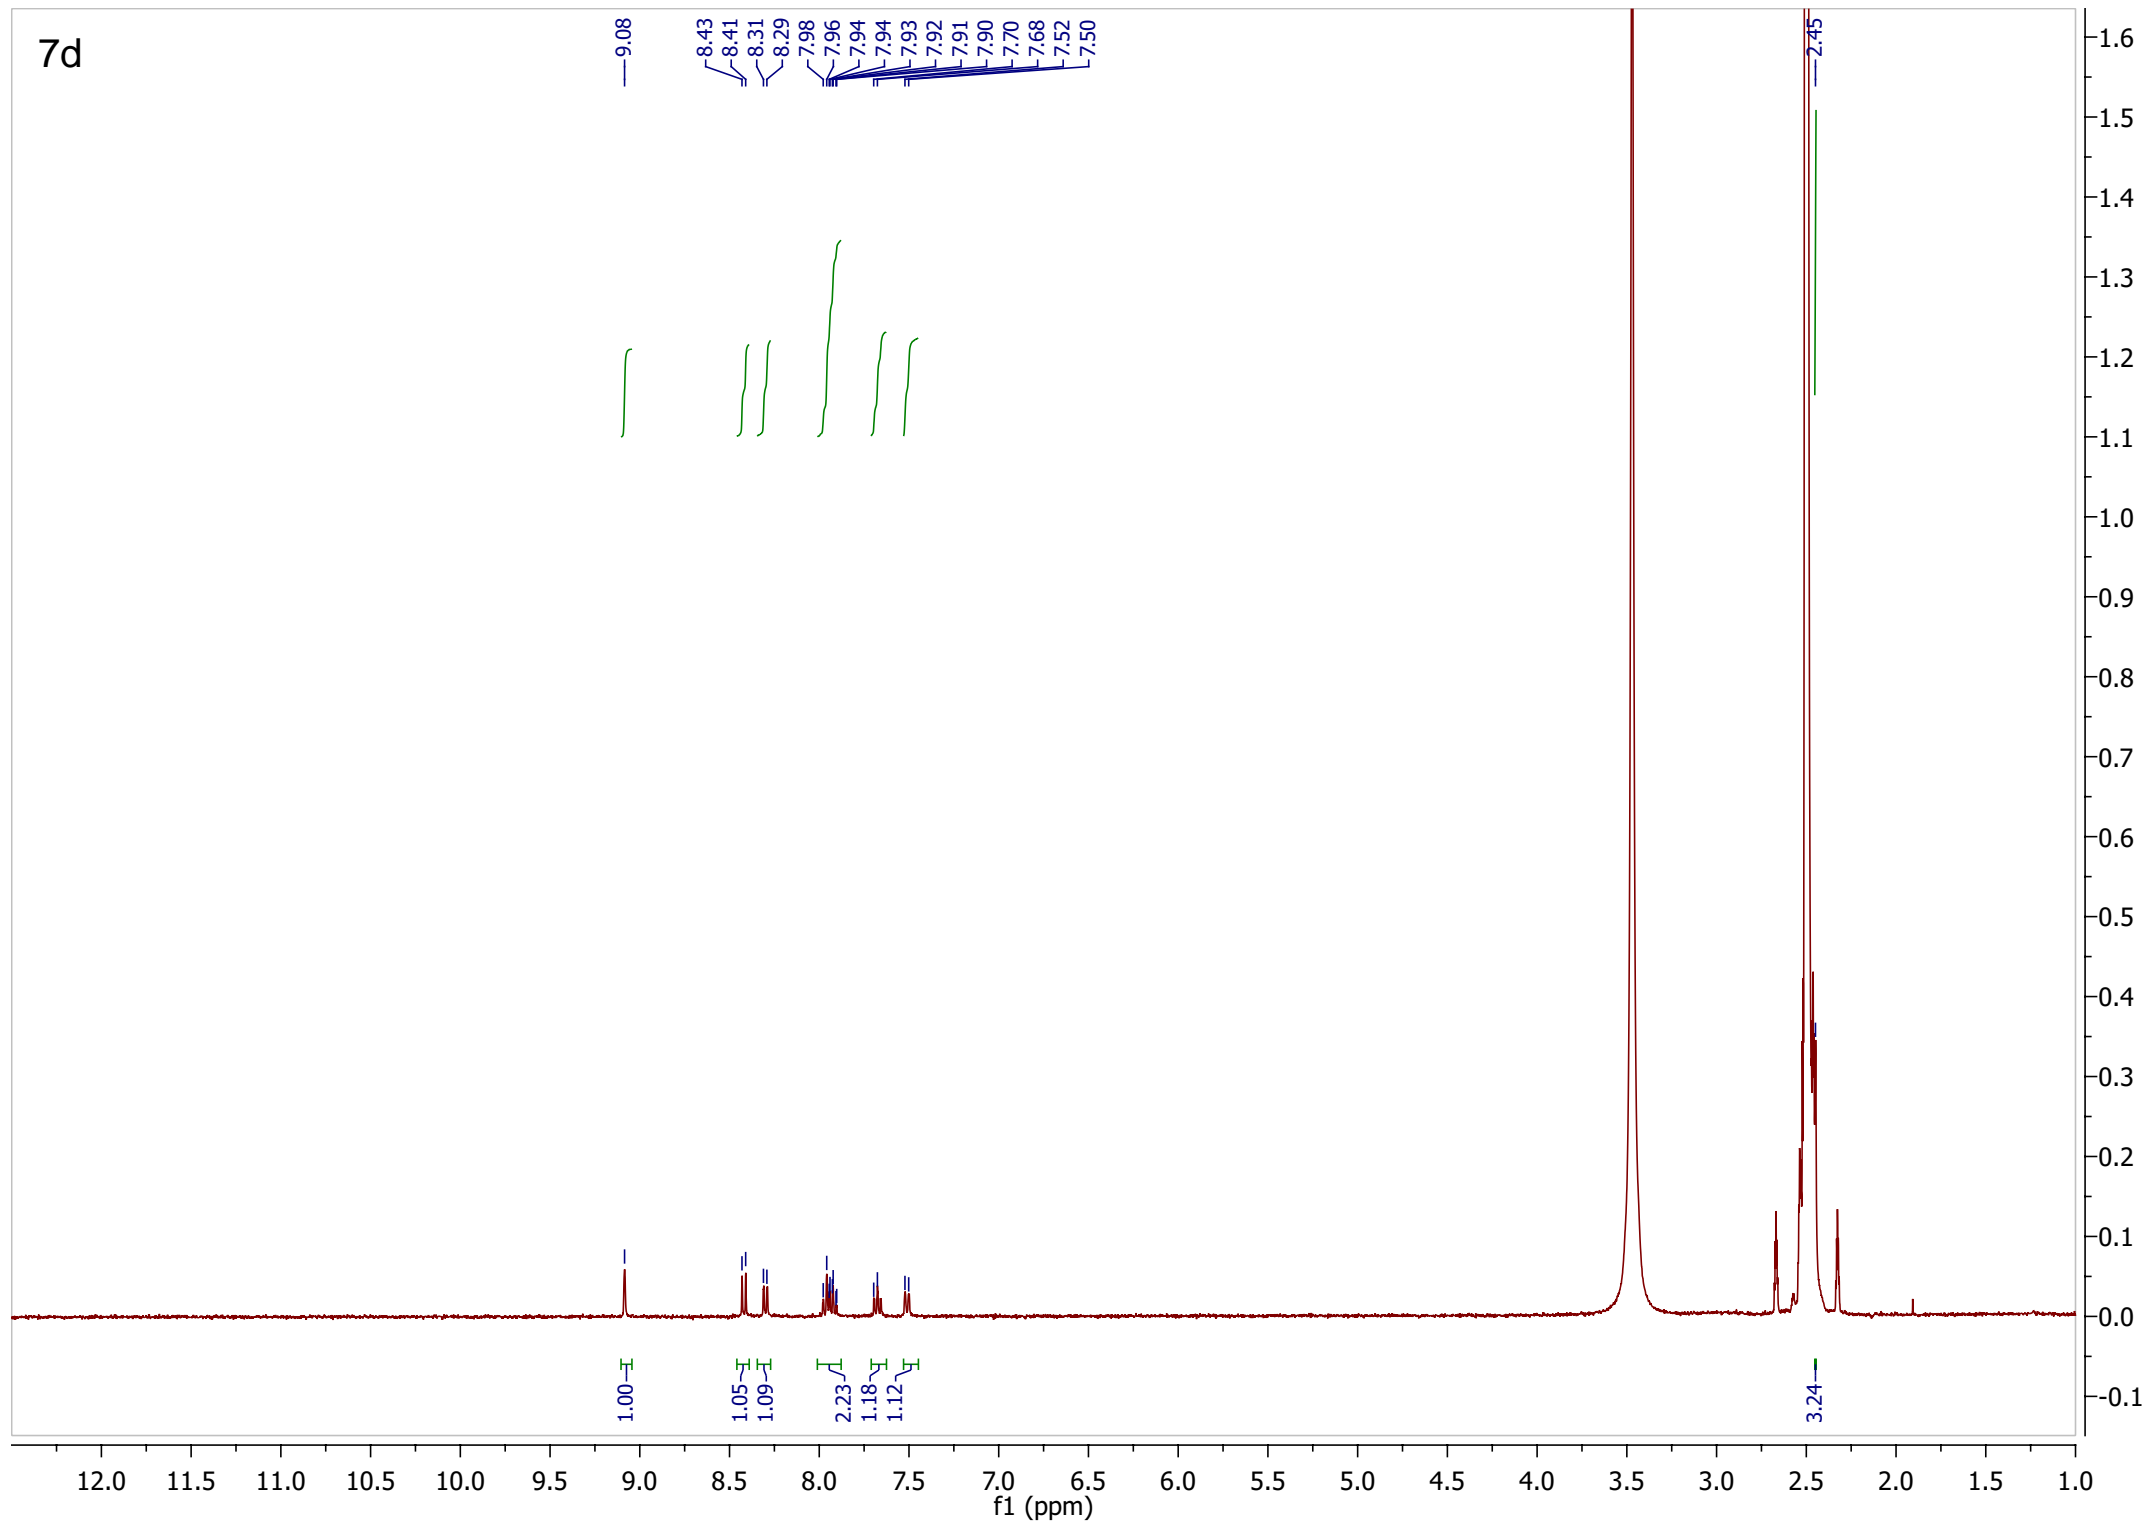

7e

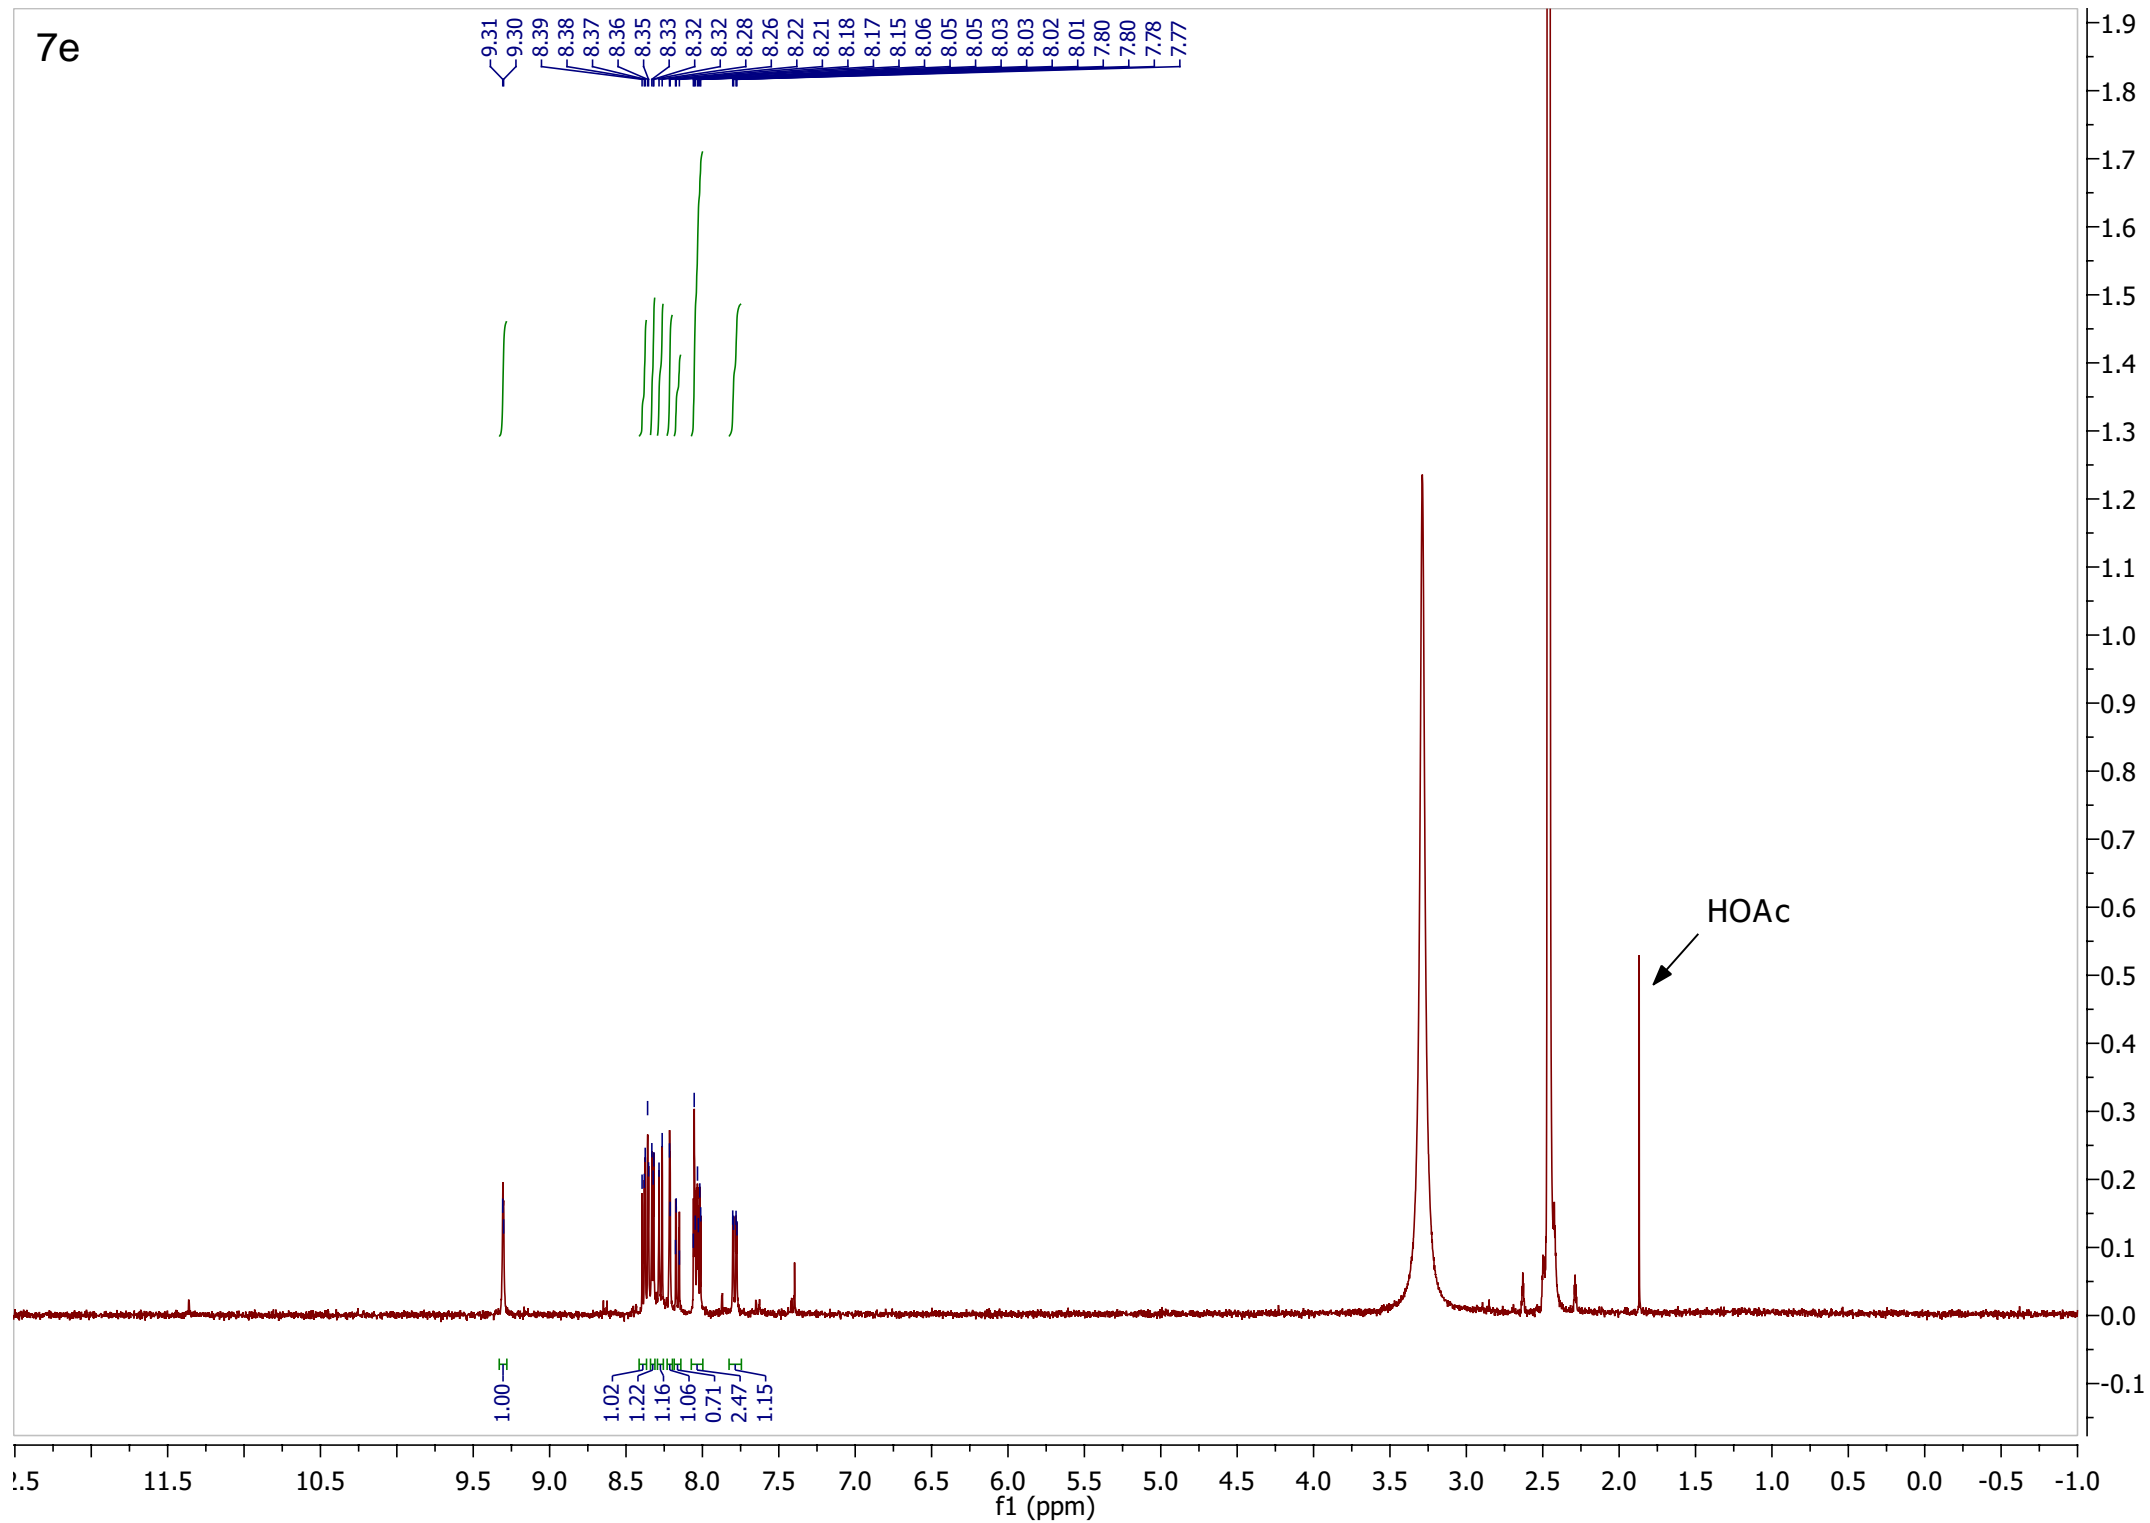

7f

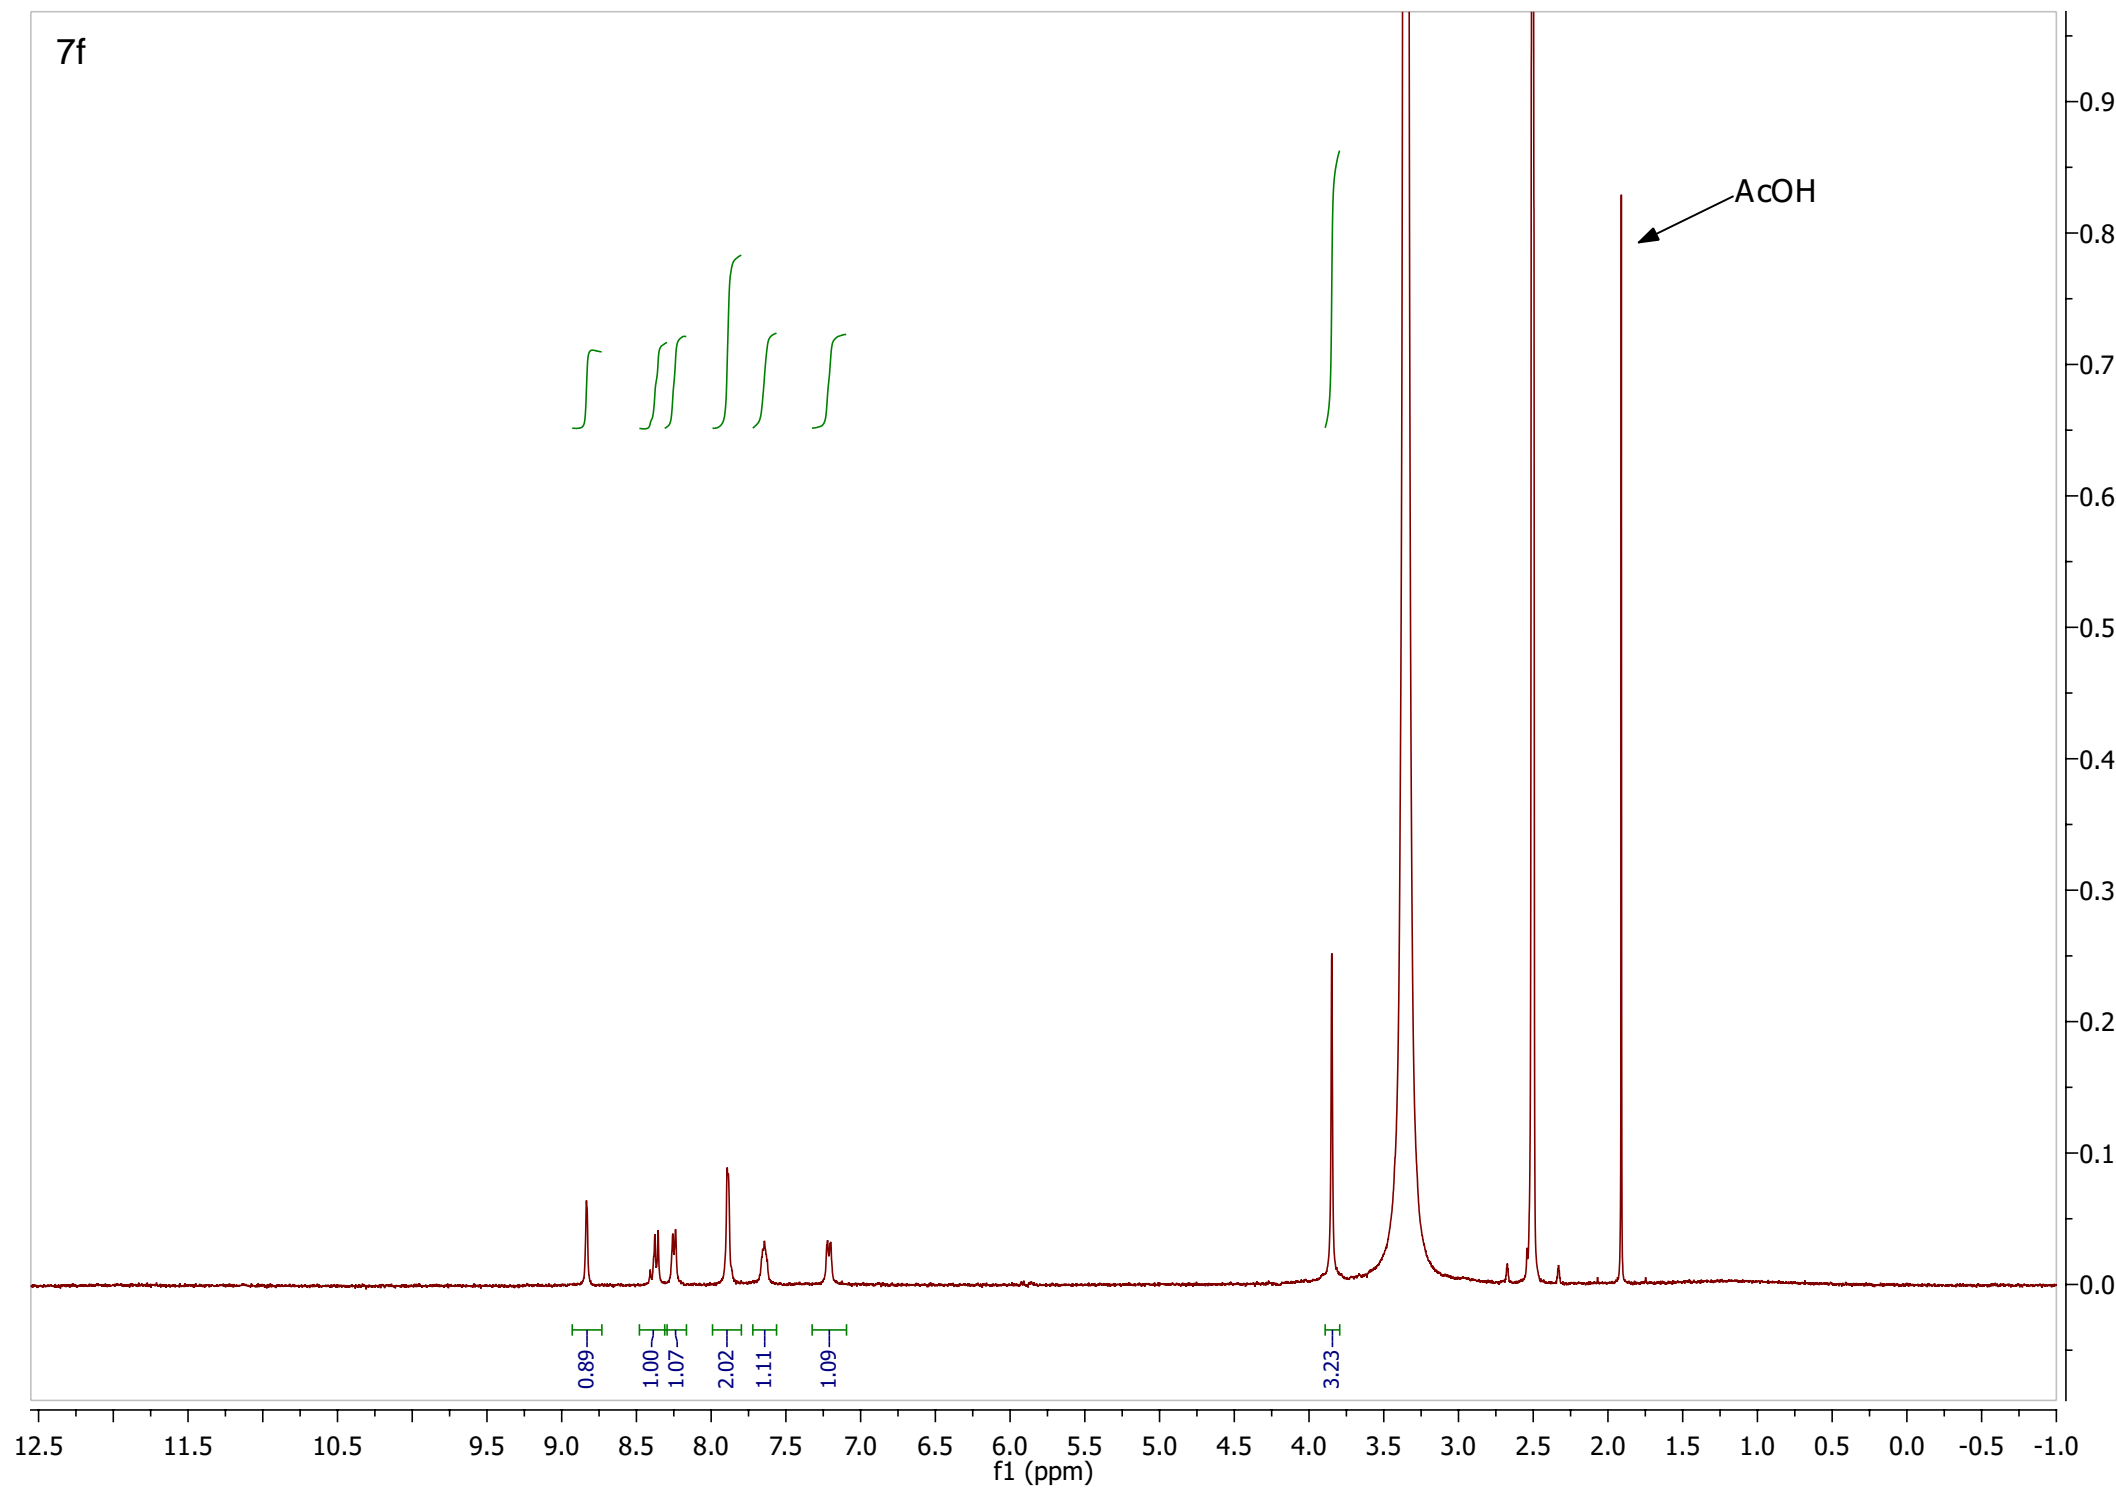



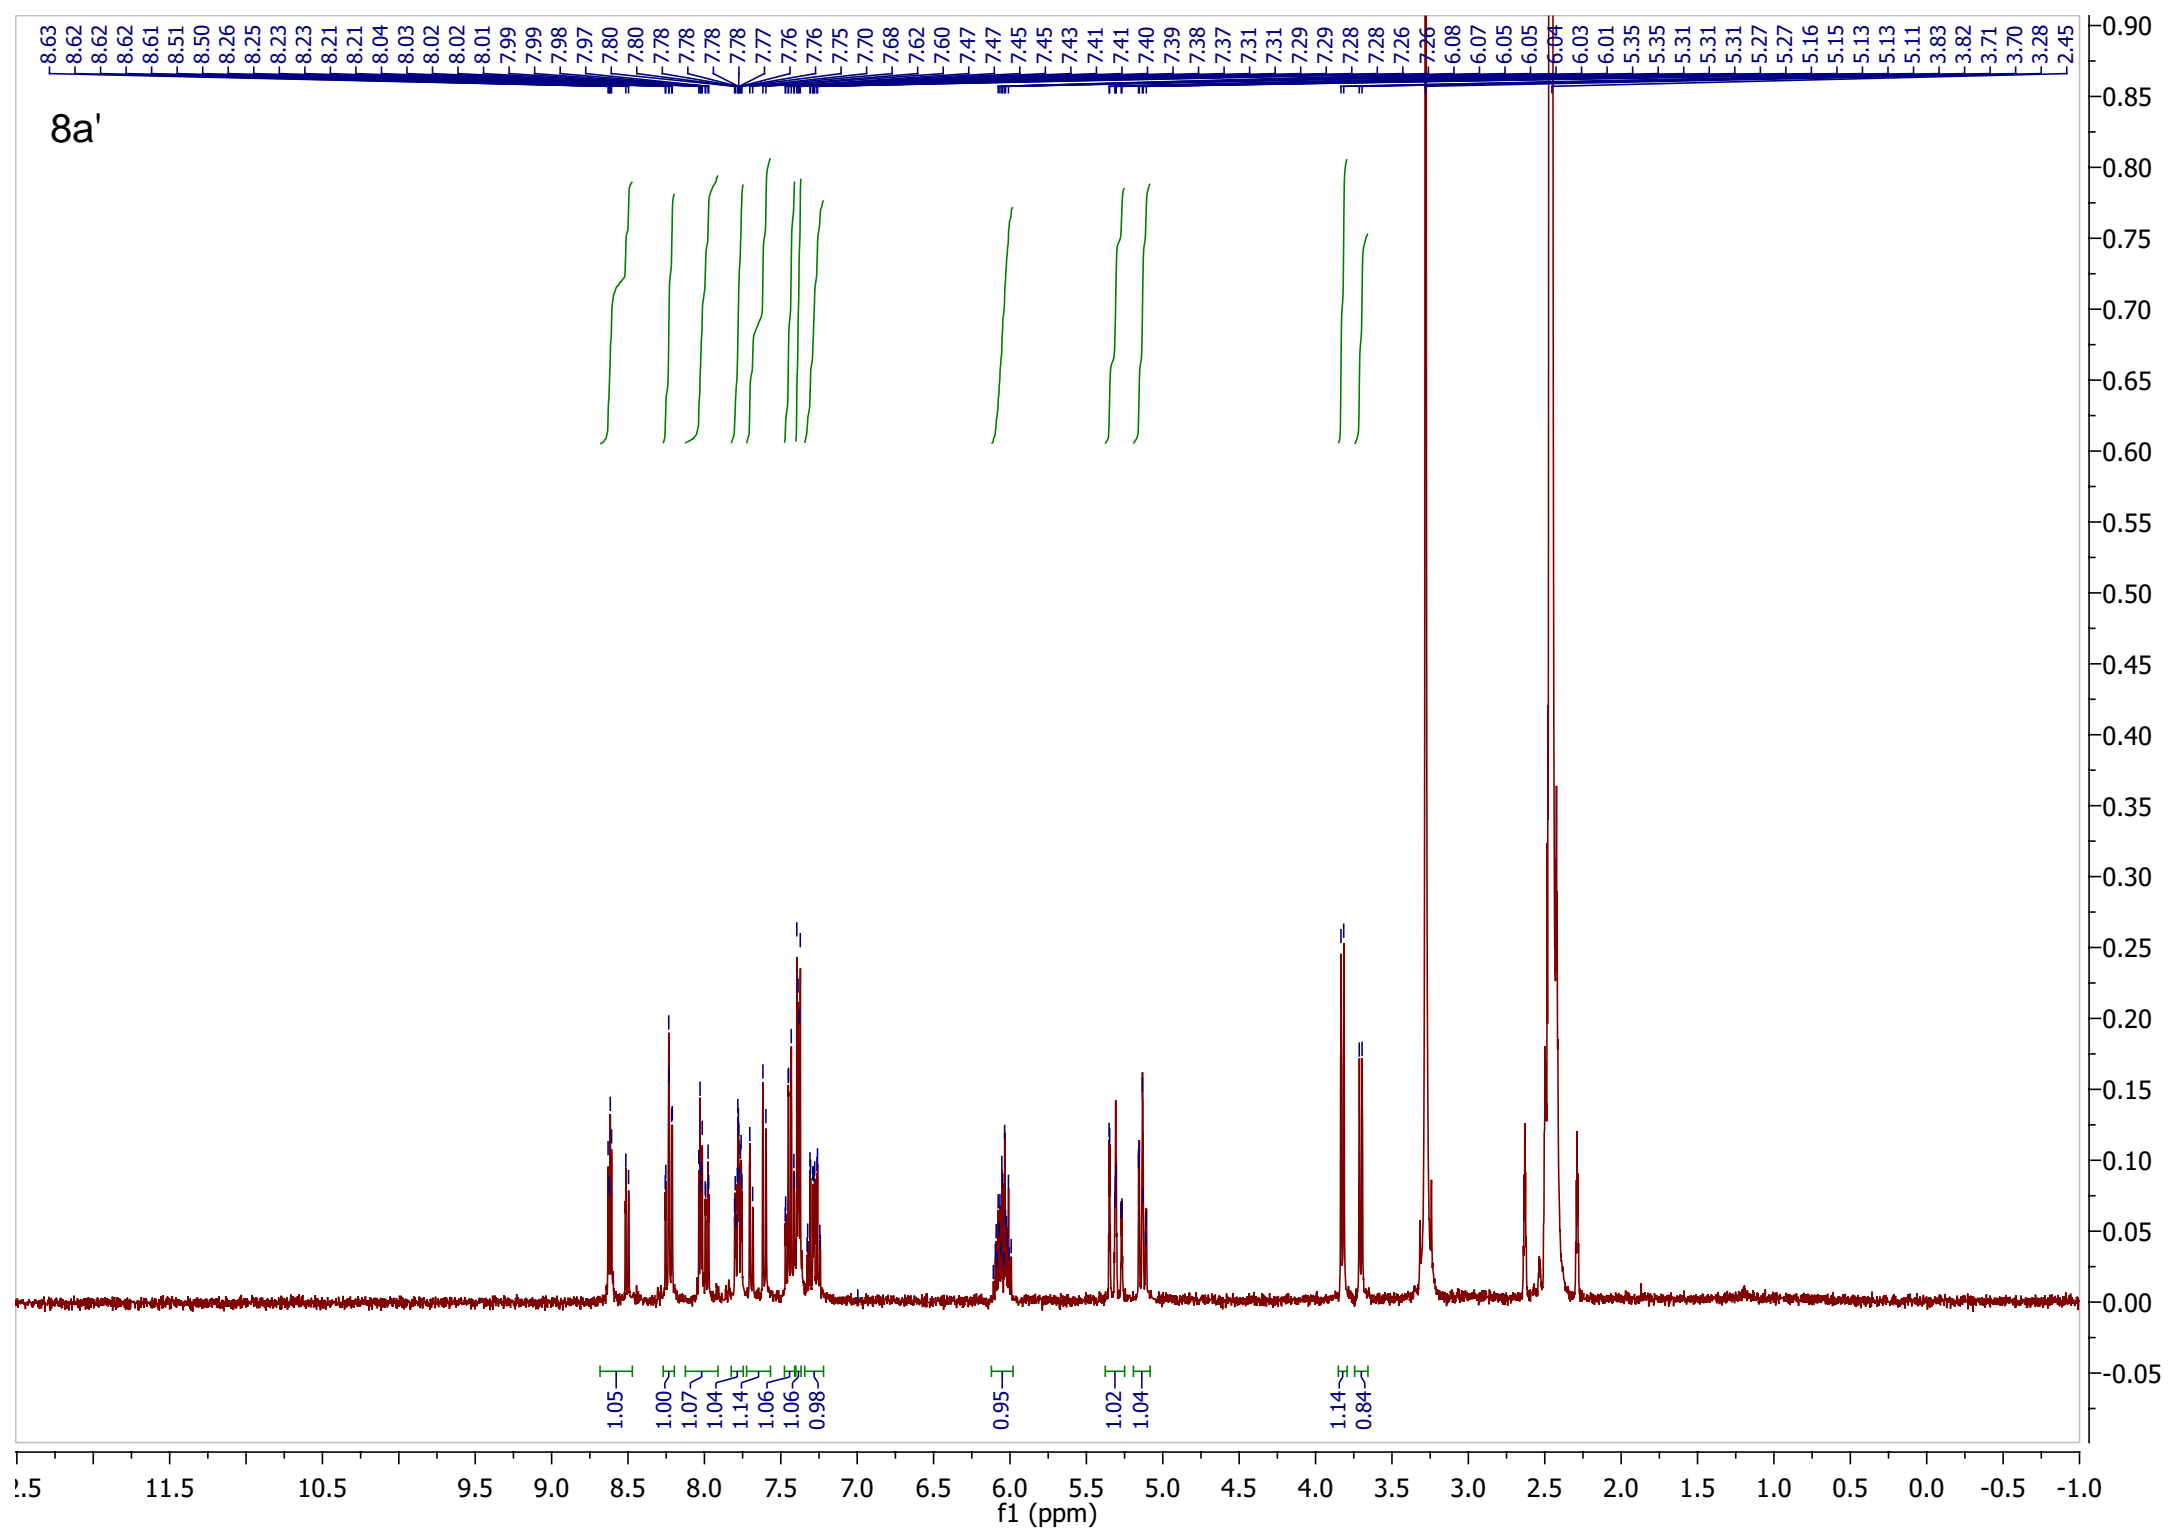

8b

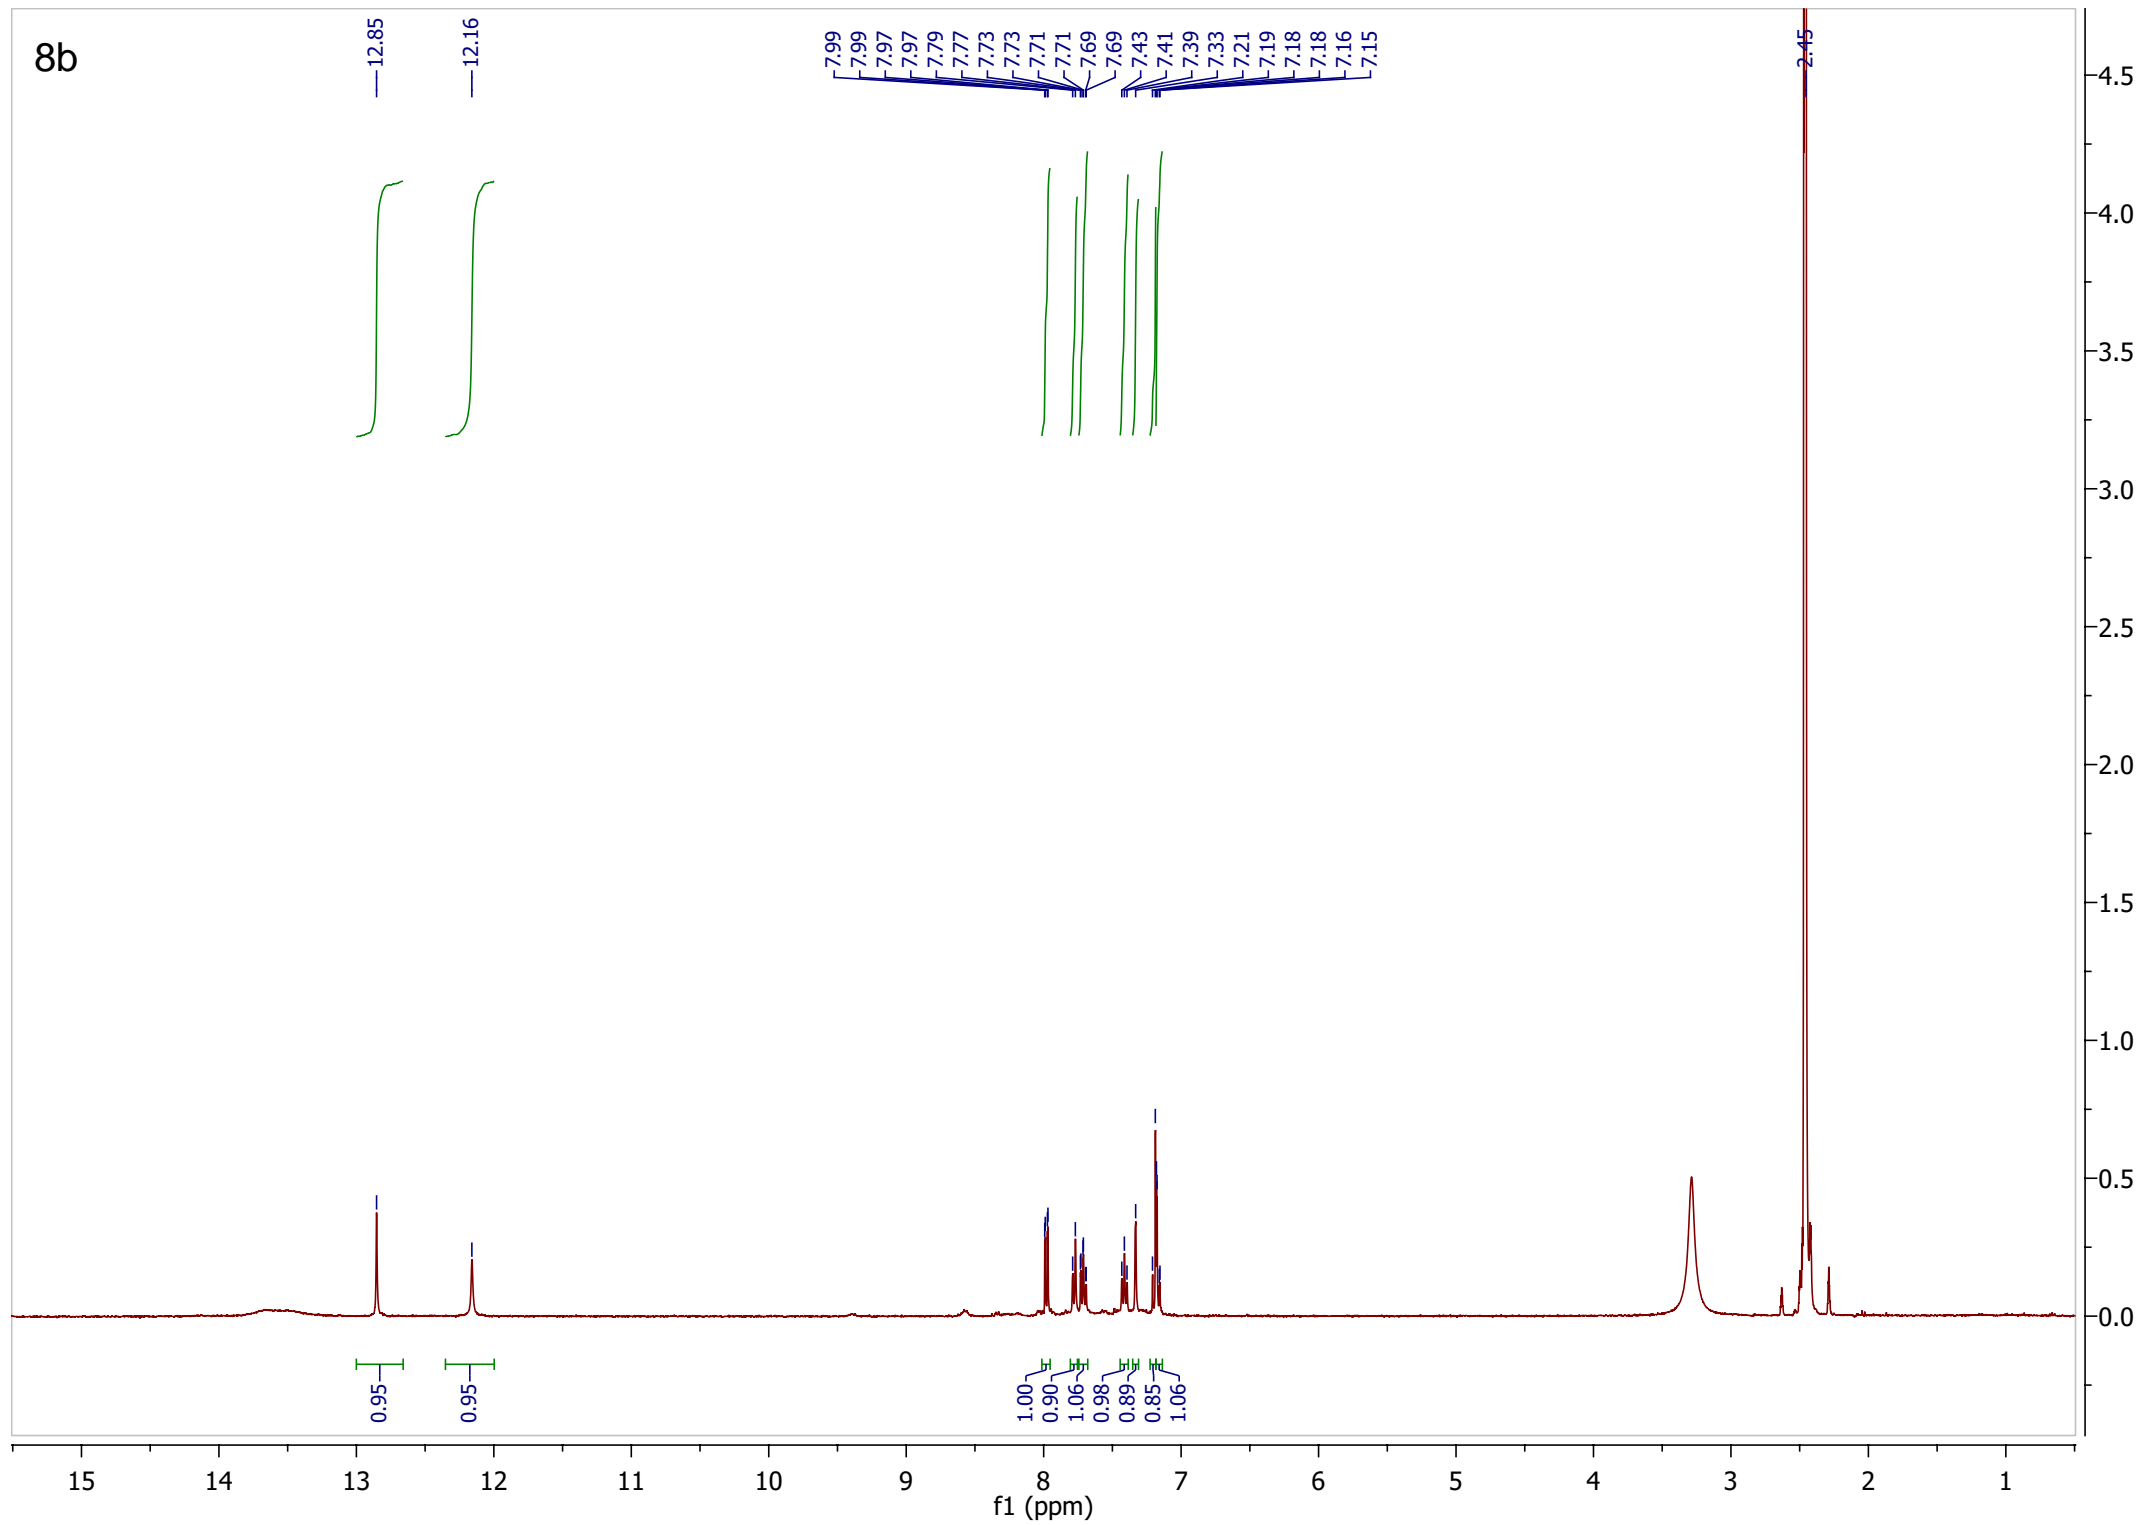

8b

—193.11

—169.88

—167.18

—154.29

136.97

134.43

133.41

131.96

127.34

126.70

125.05

124.76

124.57

124.14

118.37

113.54

111.02

40.72

40.67

40.51

40.46

40.35

40.04

39.83

39.62

39.41

0.0038

0.0036

0.0034

0.0032

0.0030

0.0028

0.0026

0.0024

0.0022

0.0020

0.0018

0.0016

0.0014

0.0012

0.0010

0.0008

0.0006

0.0004

0.0002

0.0000

-0.0002

f1 (ppm)

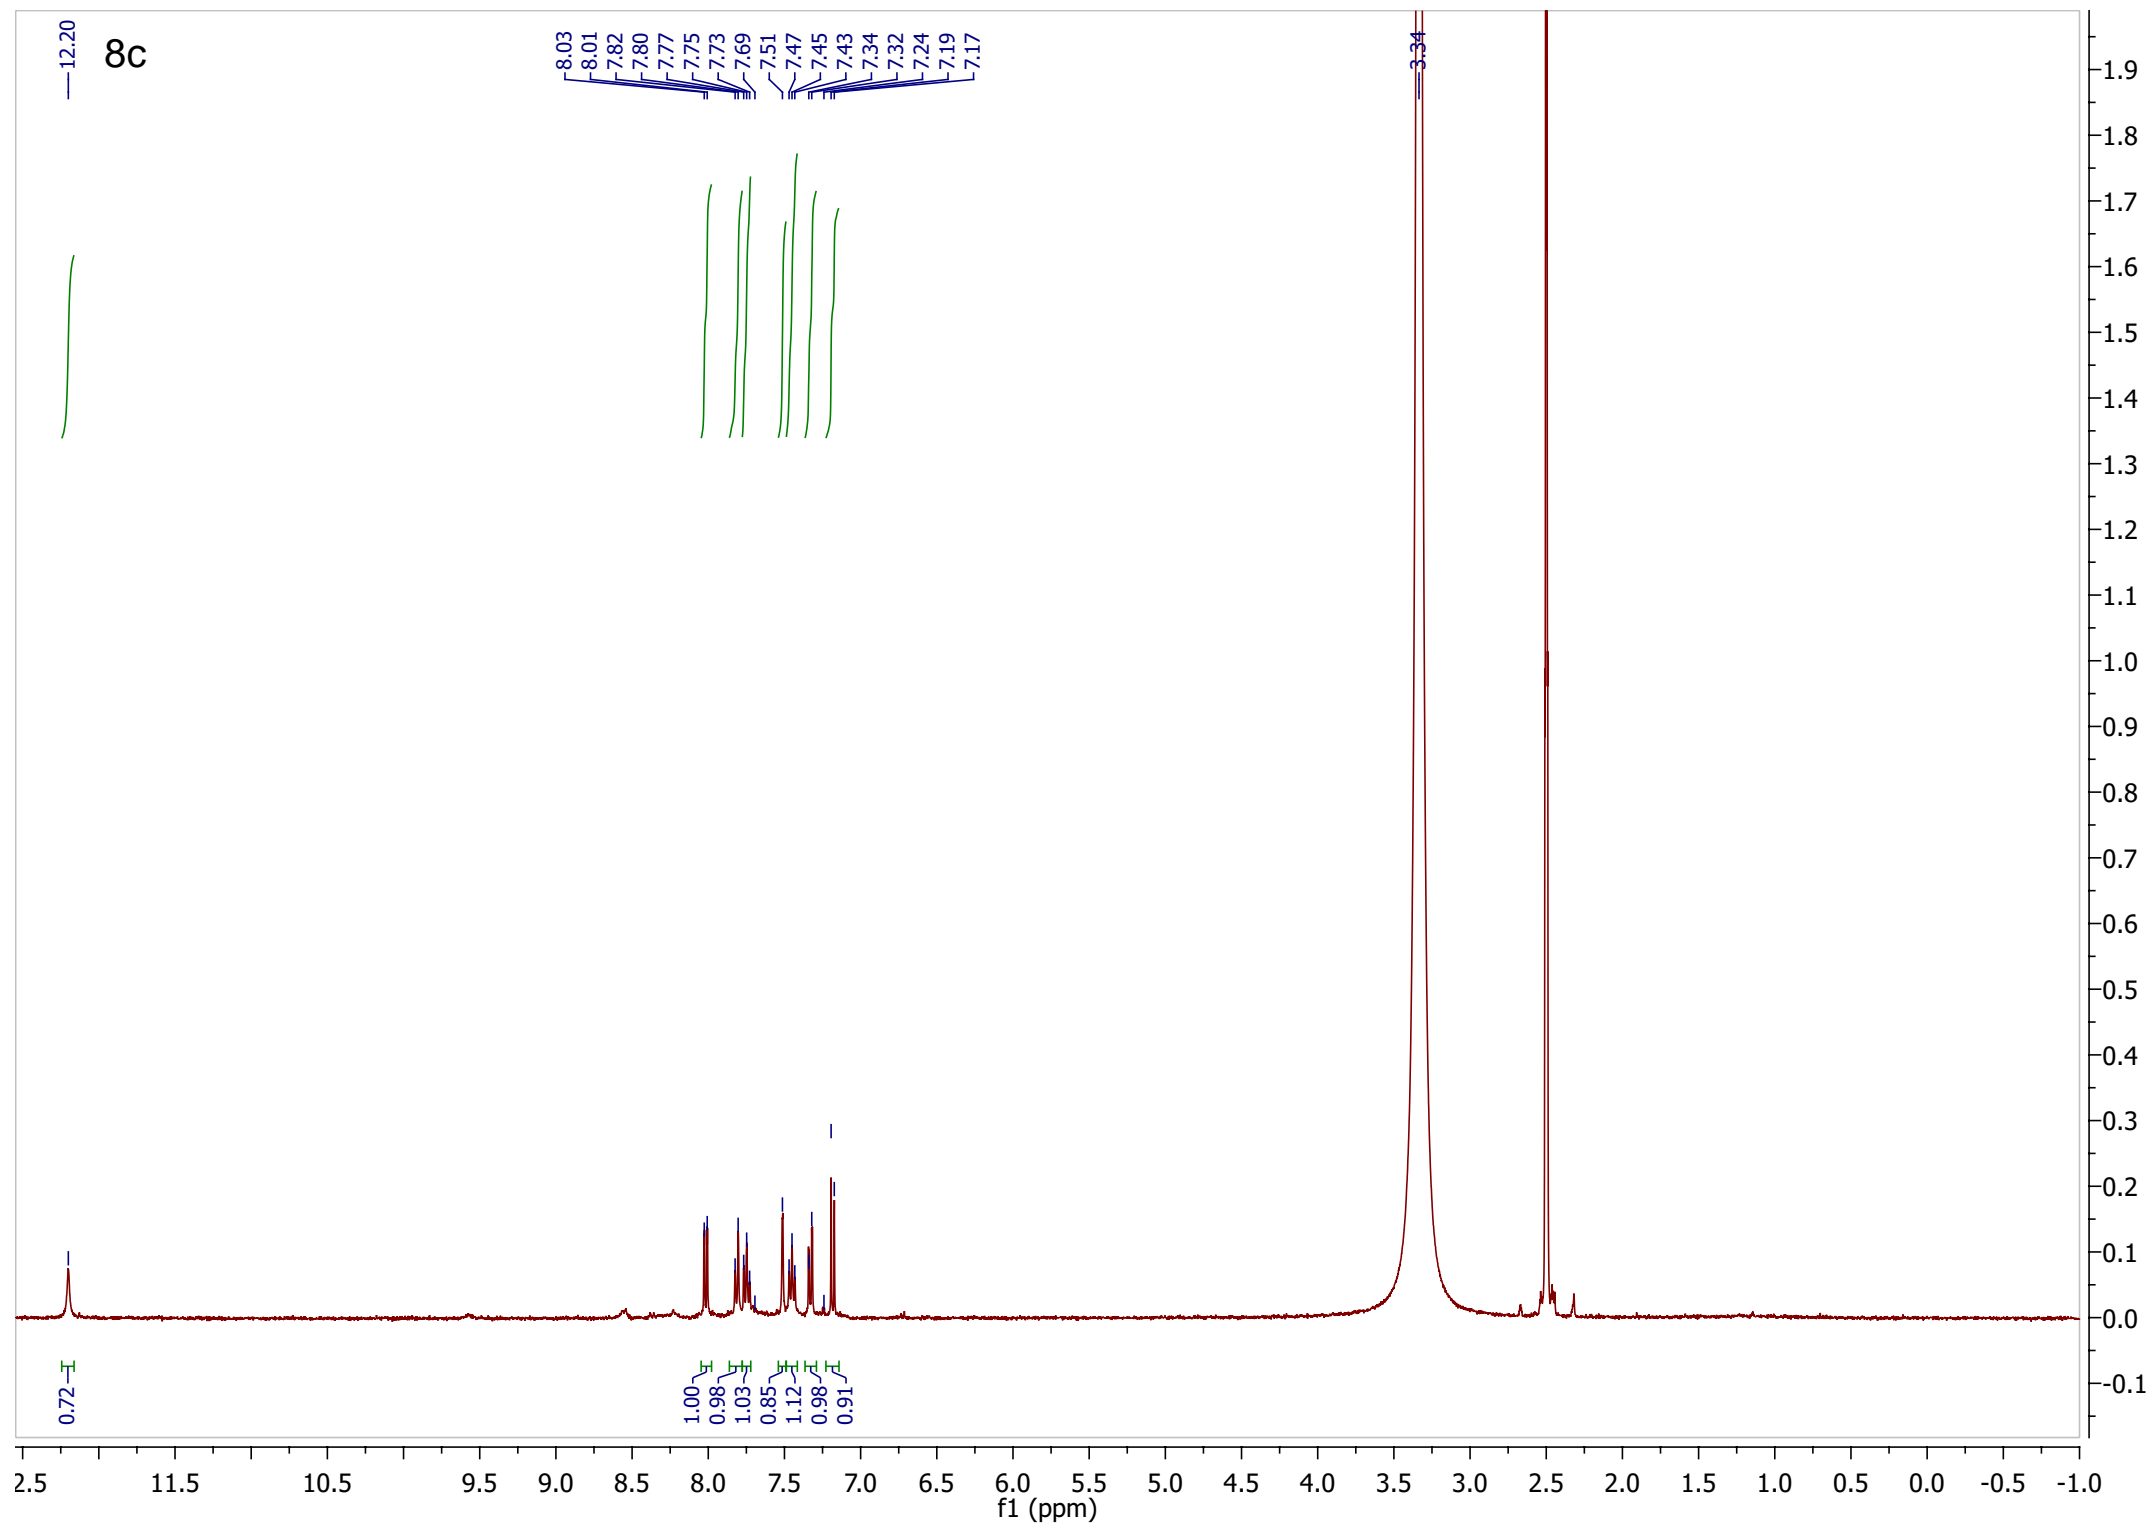

8c

—193.11

—169.89

—167.18

—154.12

136.95

134.43

133.73

131.96

126.88

126.71

125.06

124.58

121.22

118.04

115.32

114.00

110.89

0.0038

0.0036

0.0034

0.0032

0.0030

0.0028

0.0026

0.0024

0.0022

0.0020

0.0018

0.0016

0.0014

0.0012

0.0010

0.0008

0.0006

0.0004

0.0002

0.0000

-0.0002

f1 (ppm)

8d'

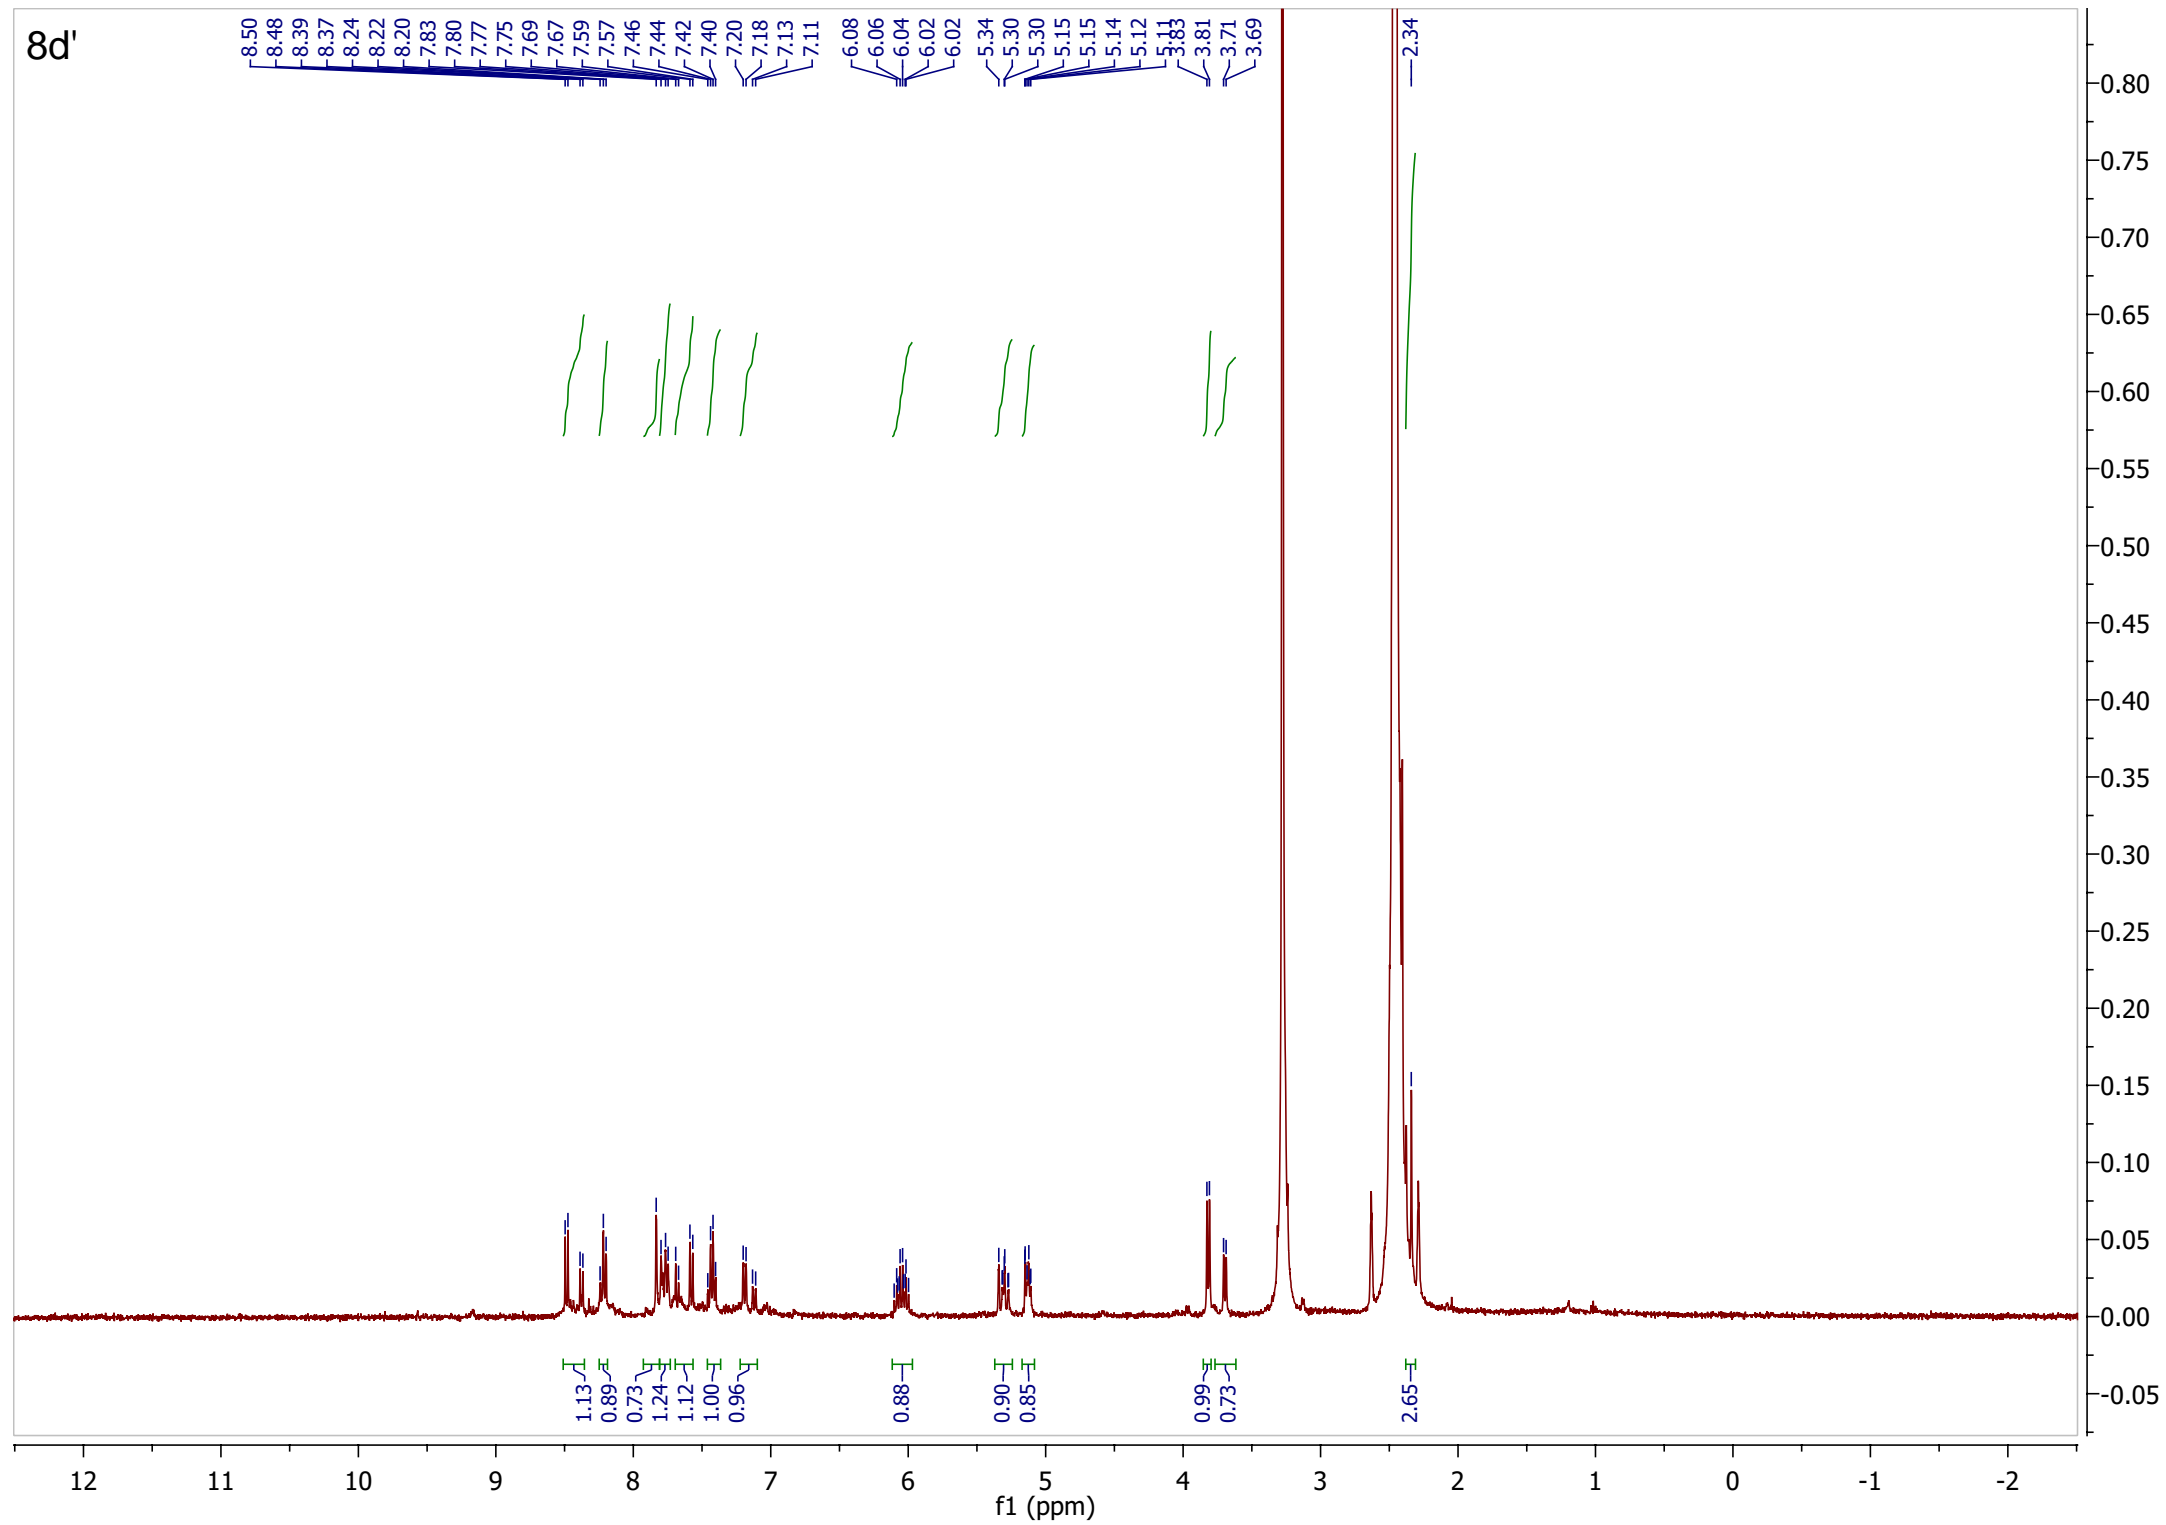

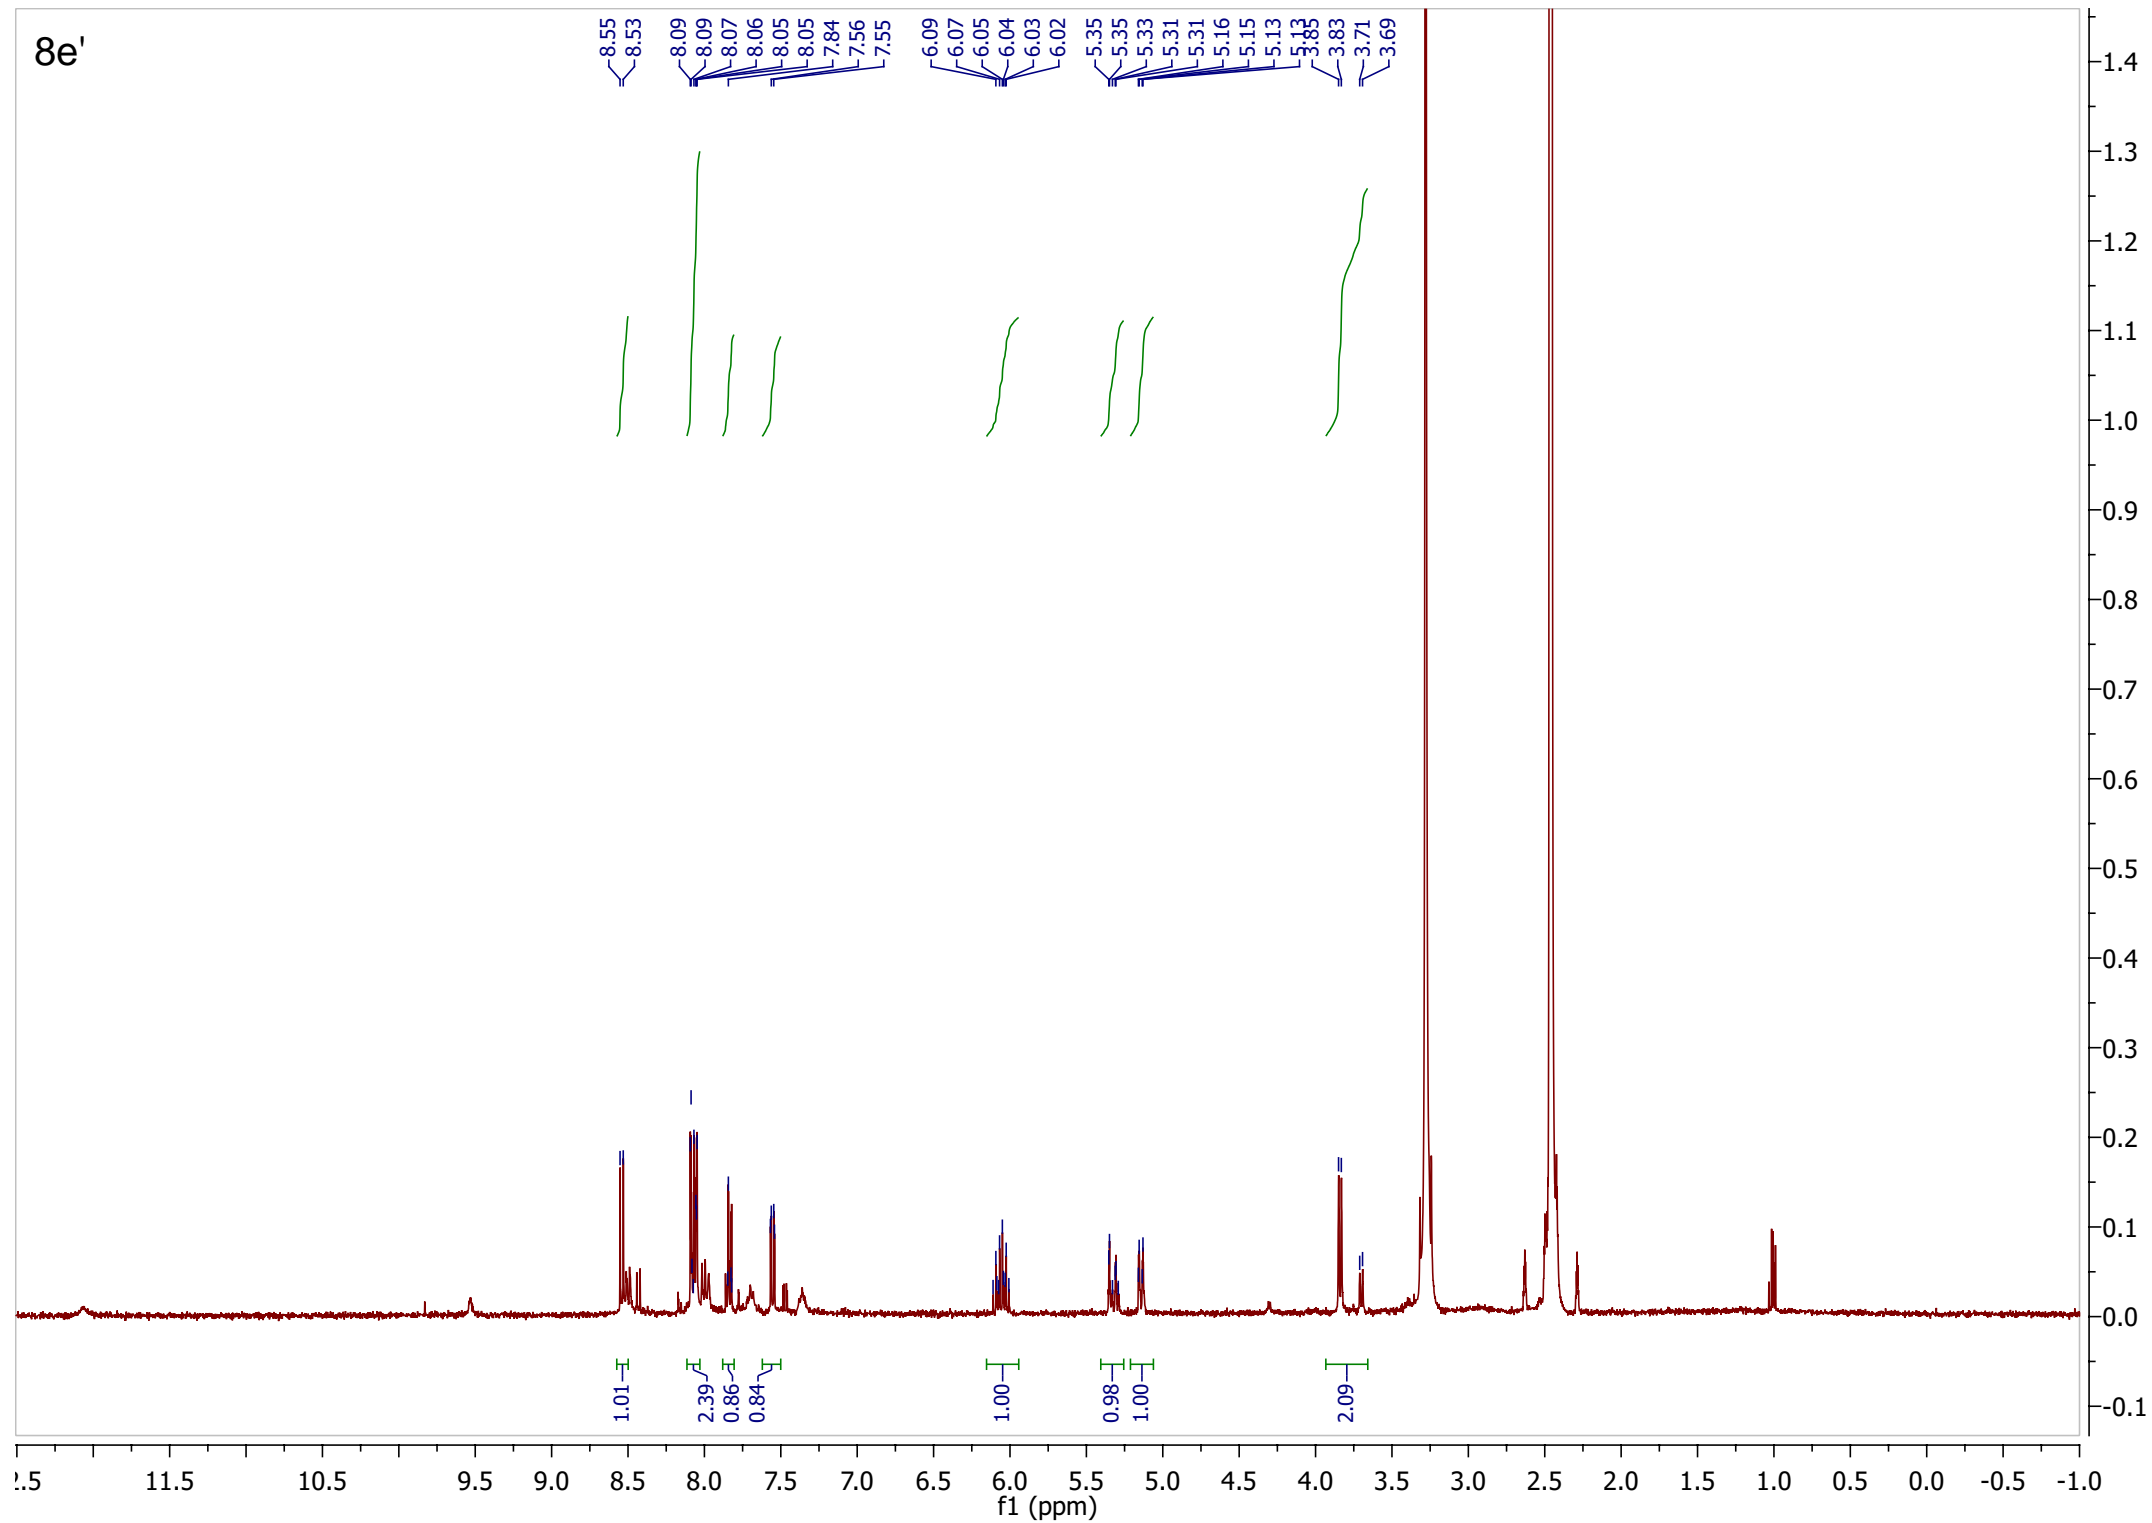

9b

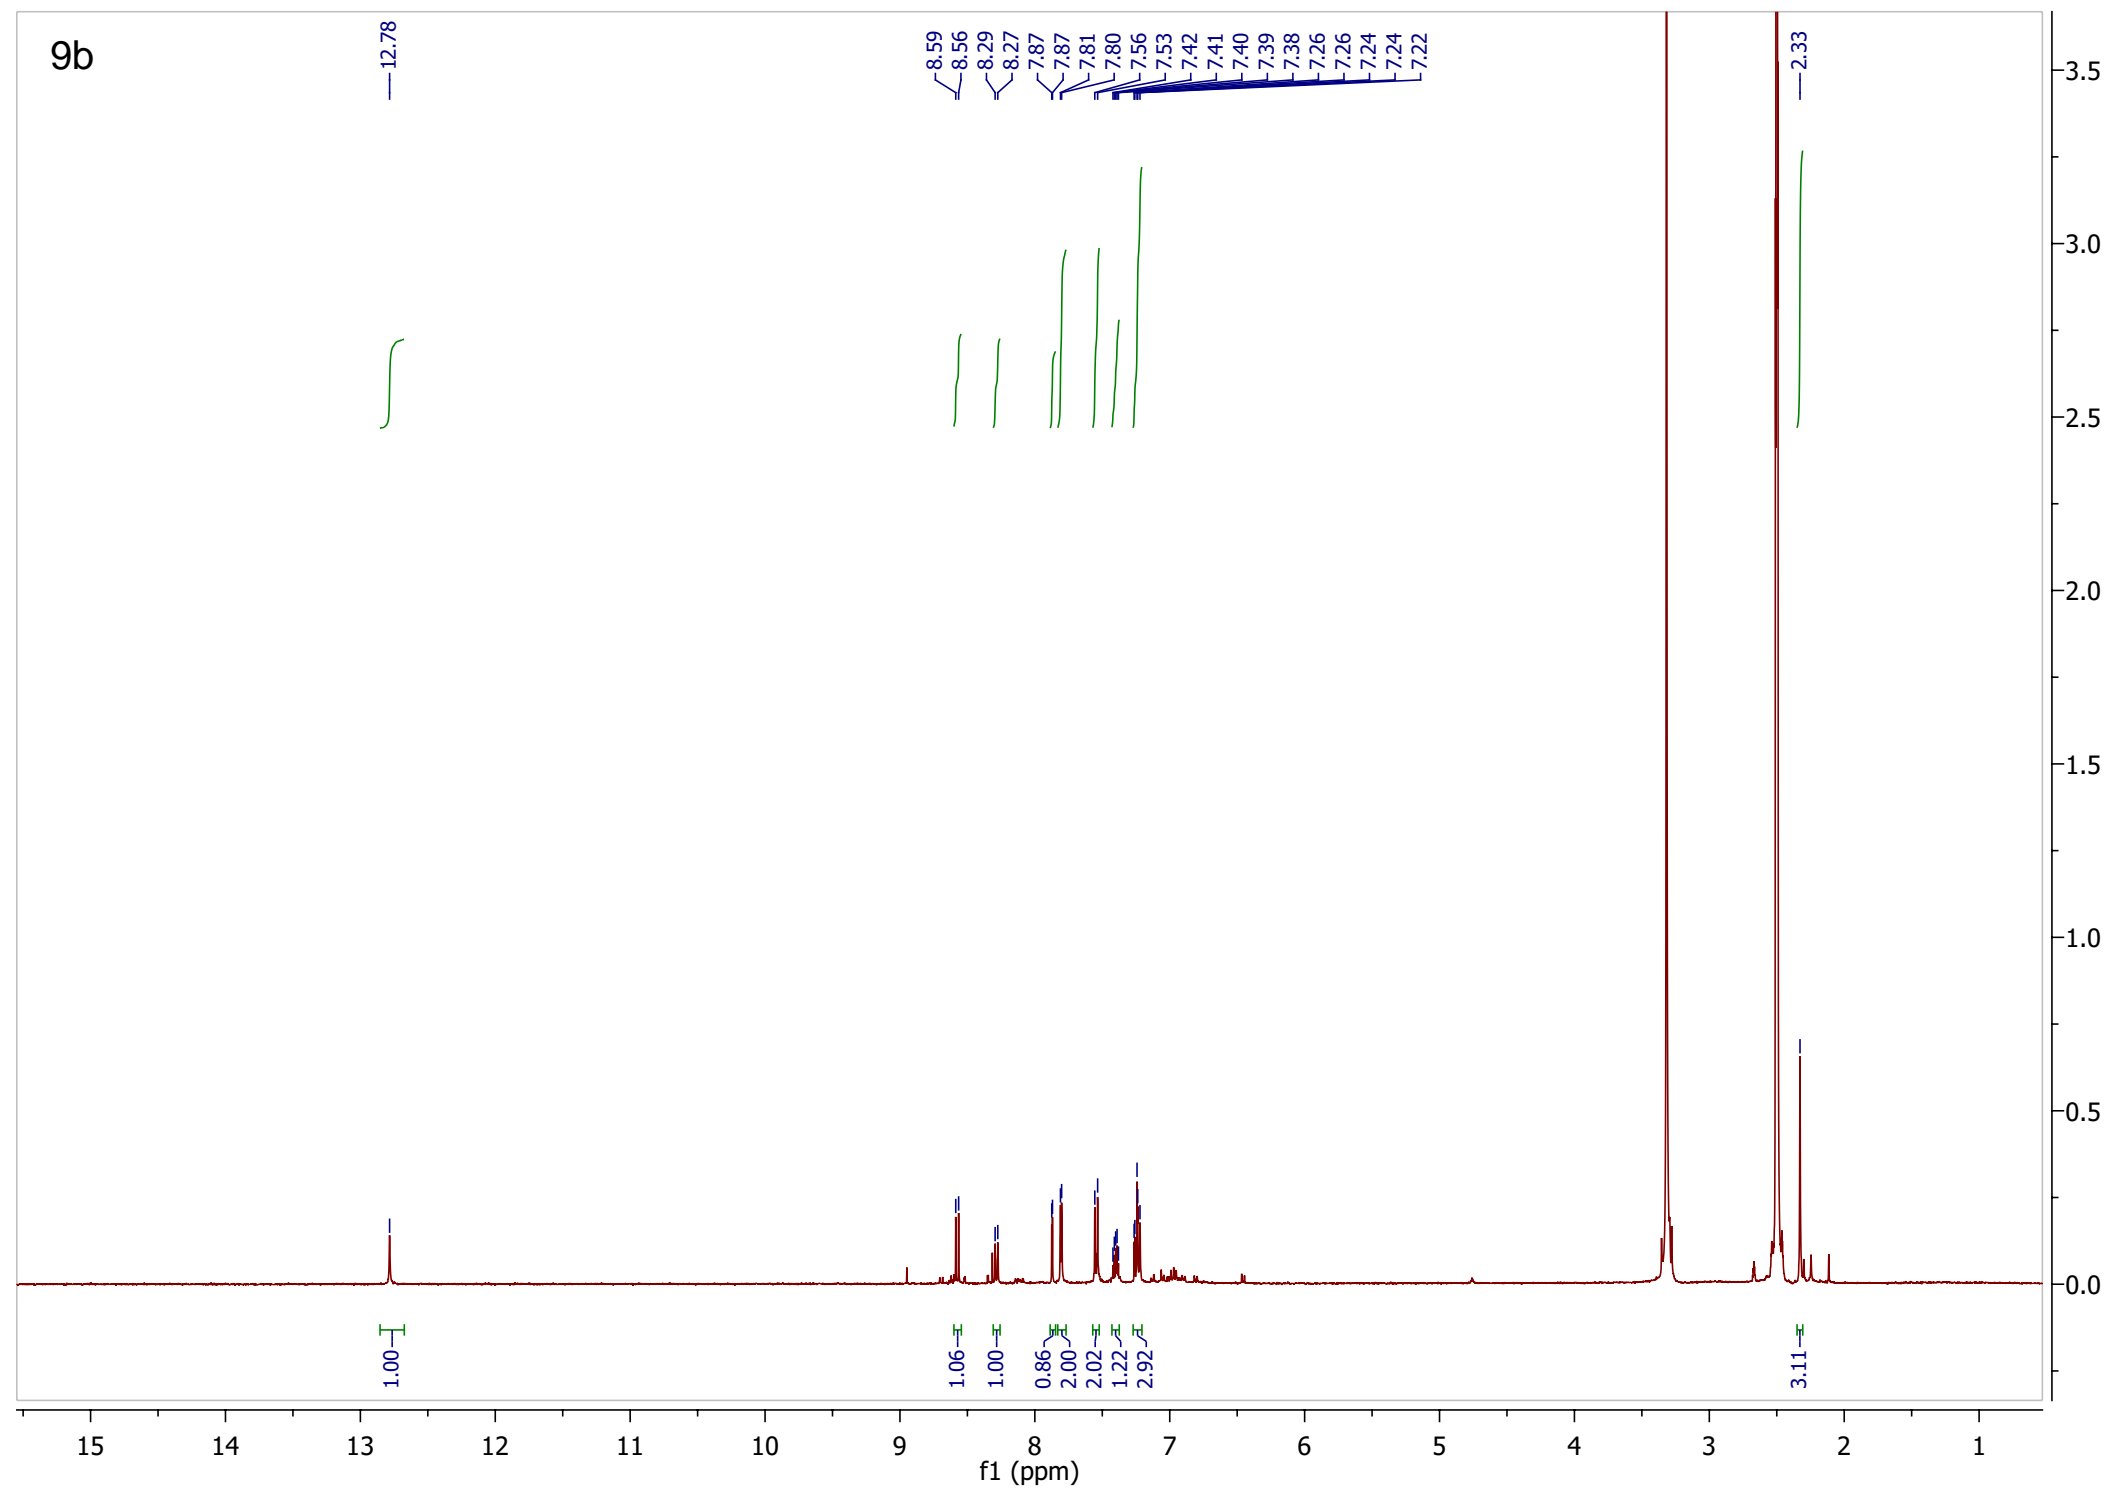



9c

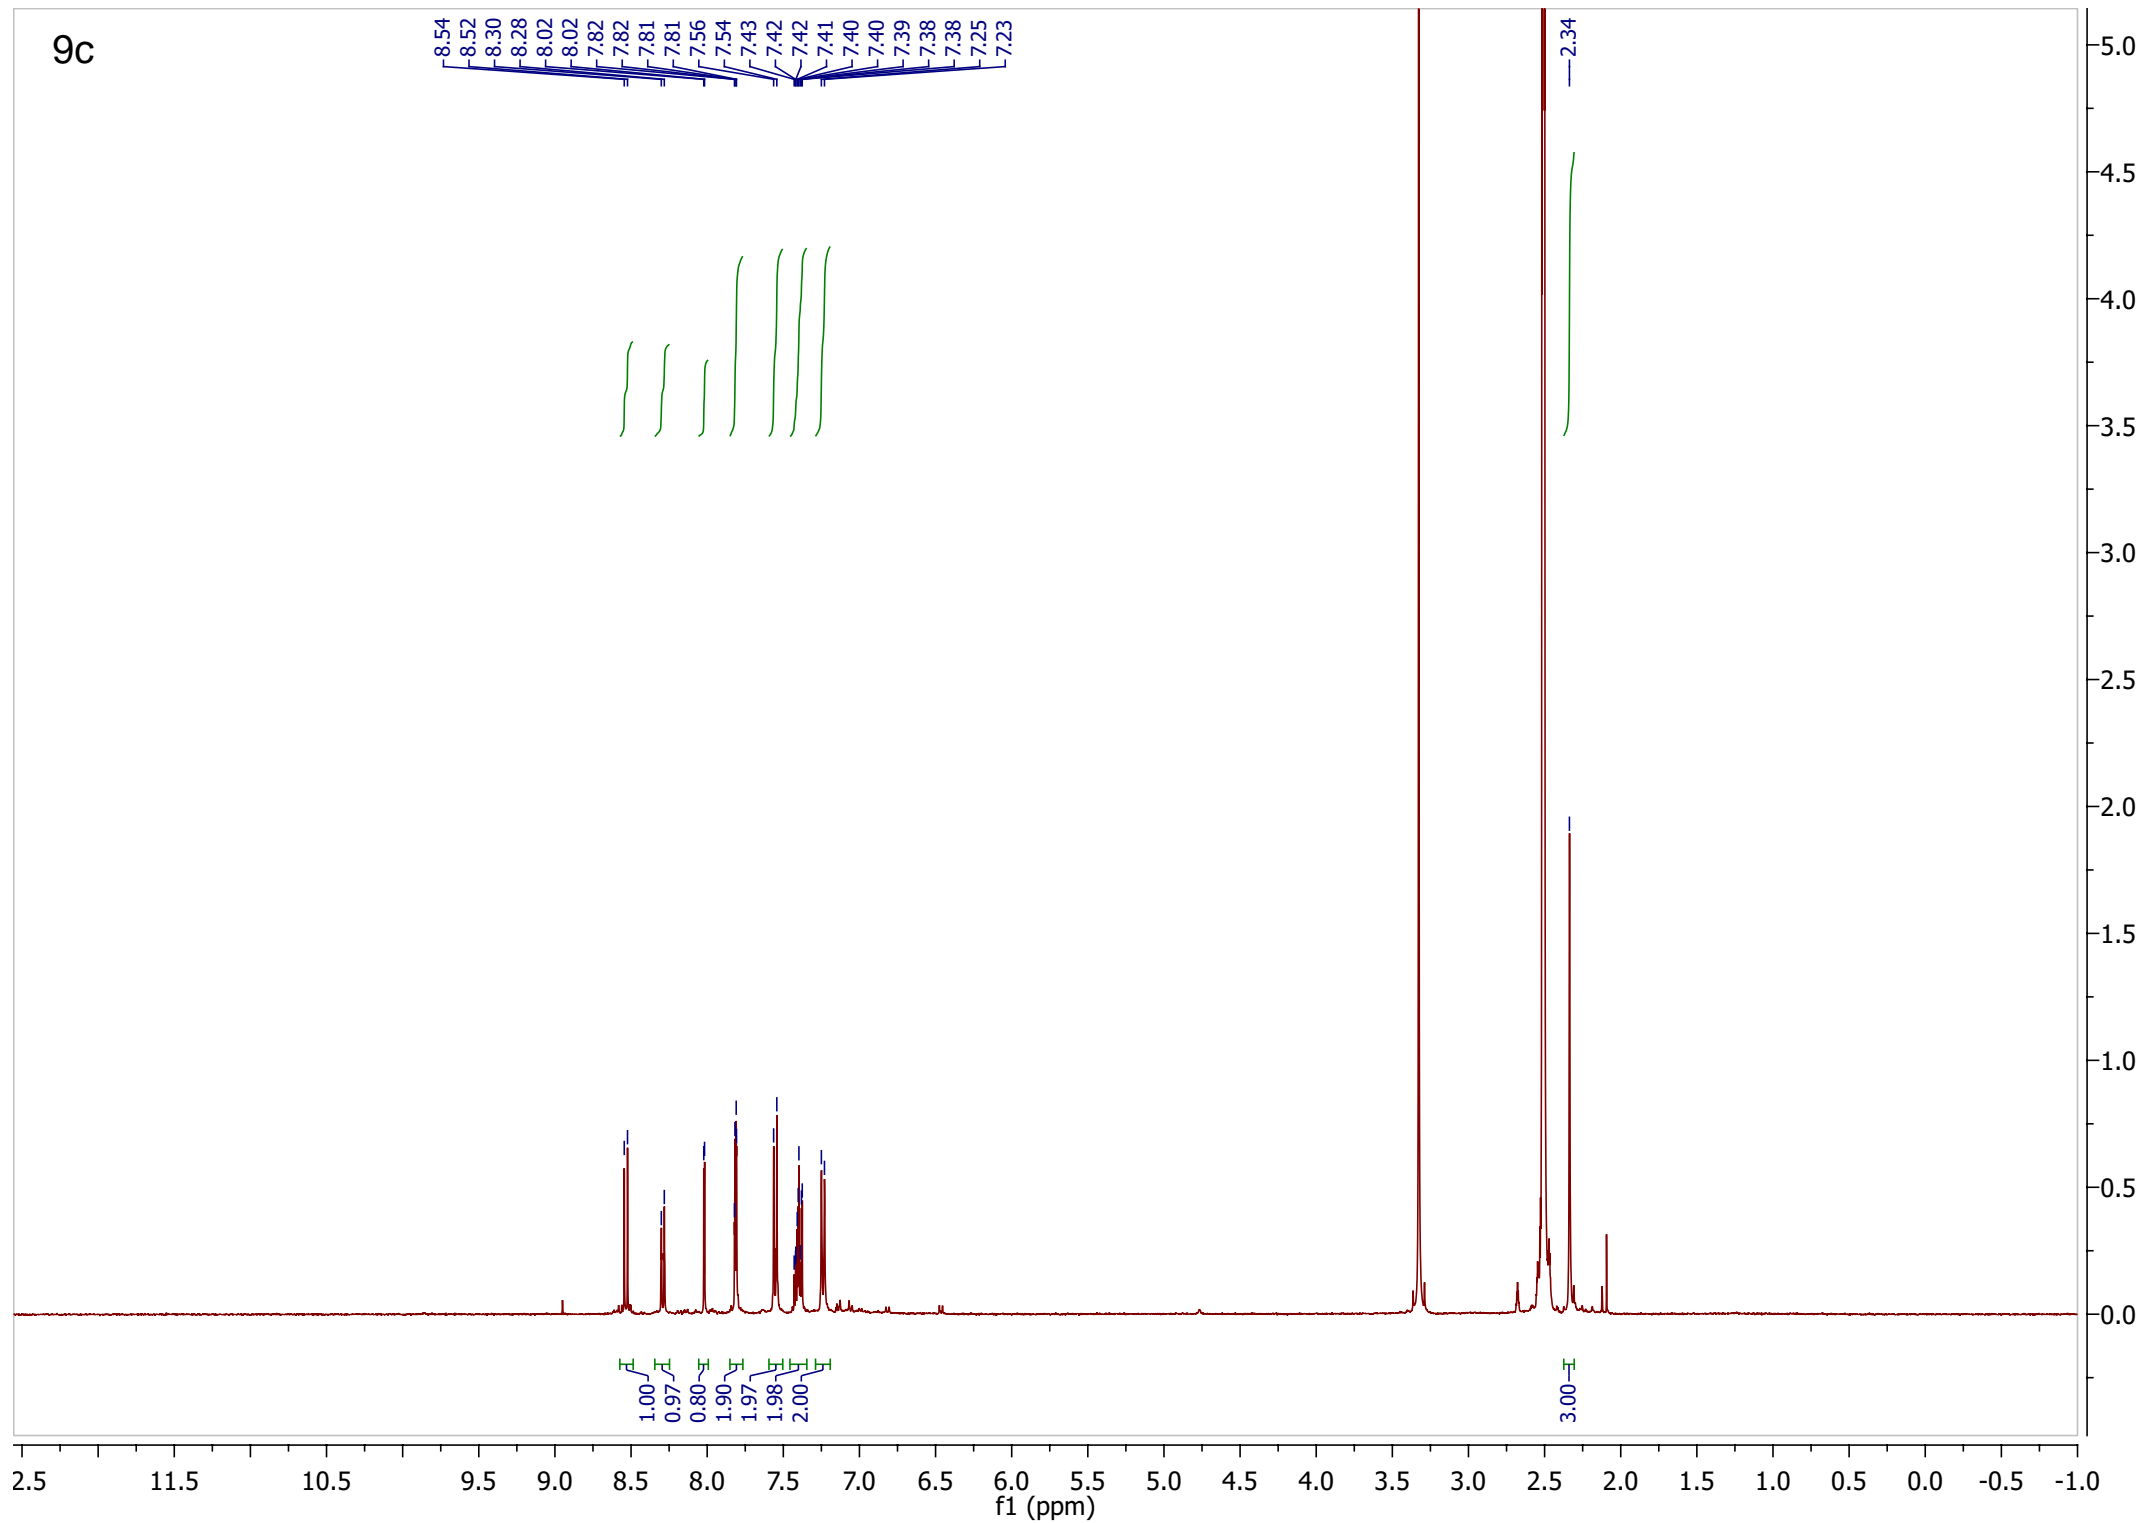

9c

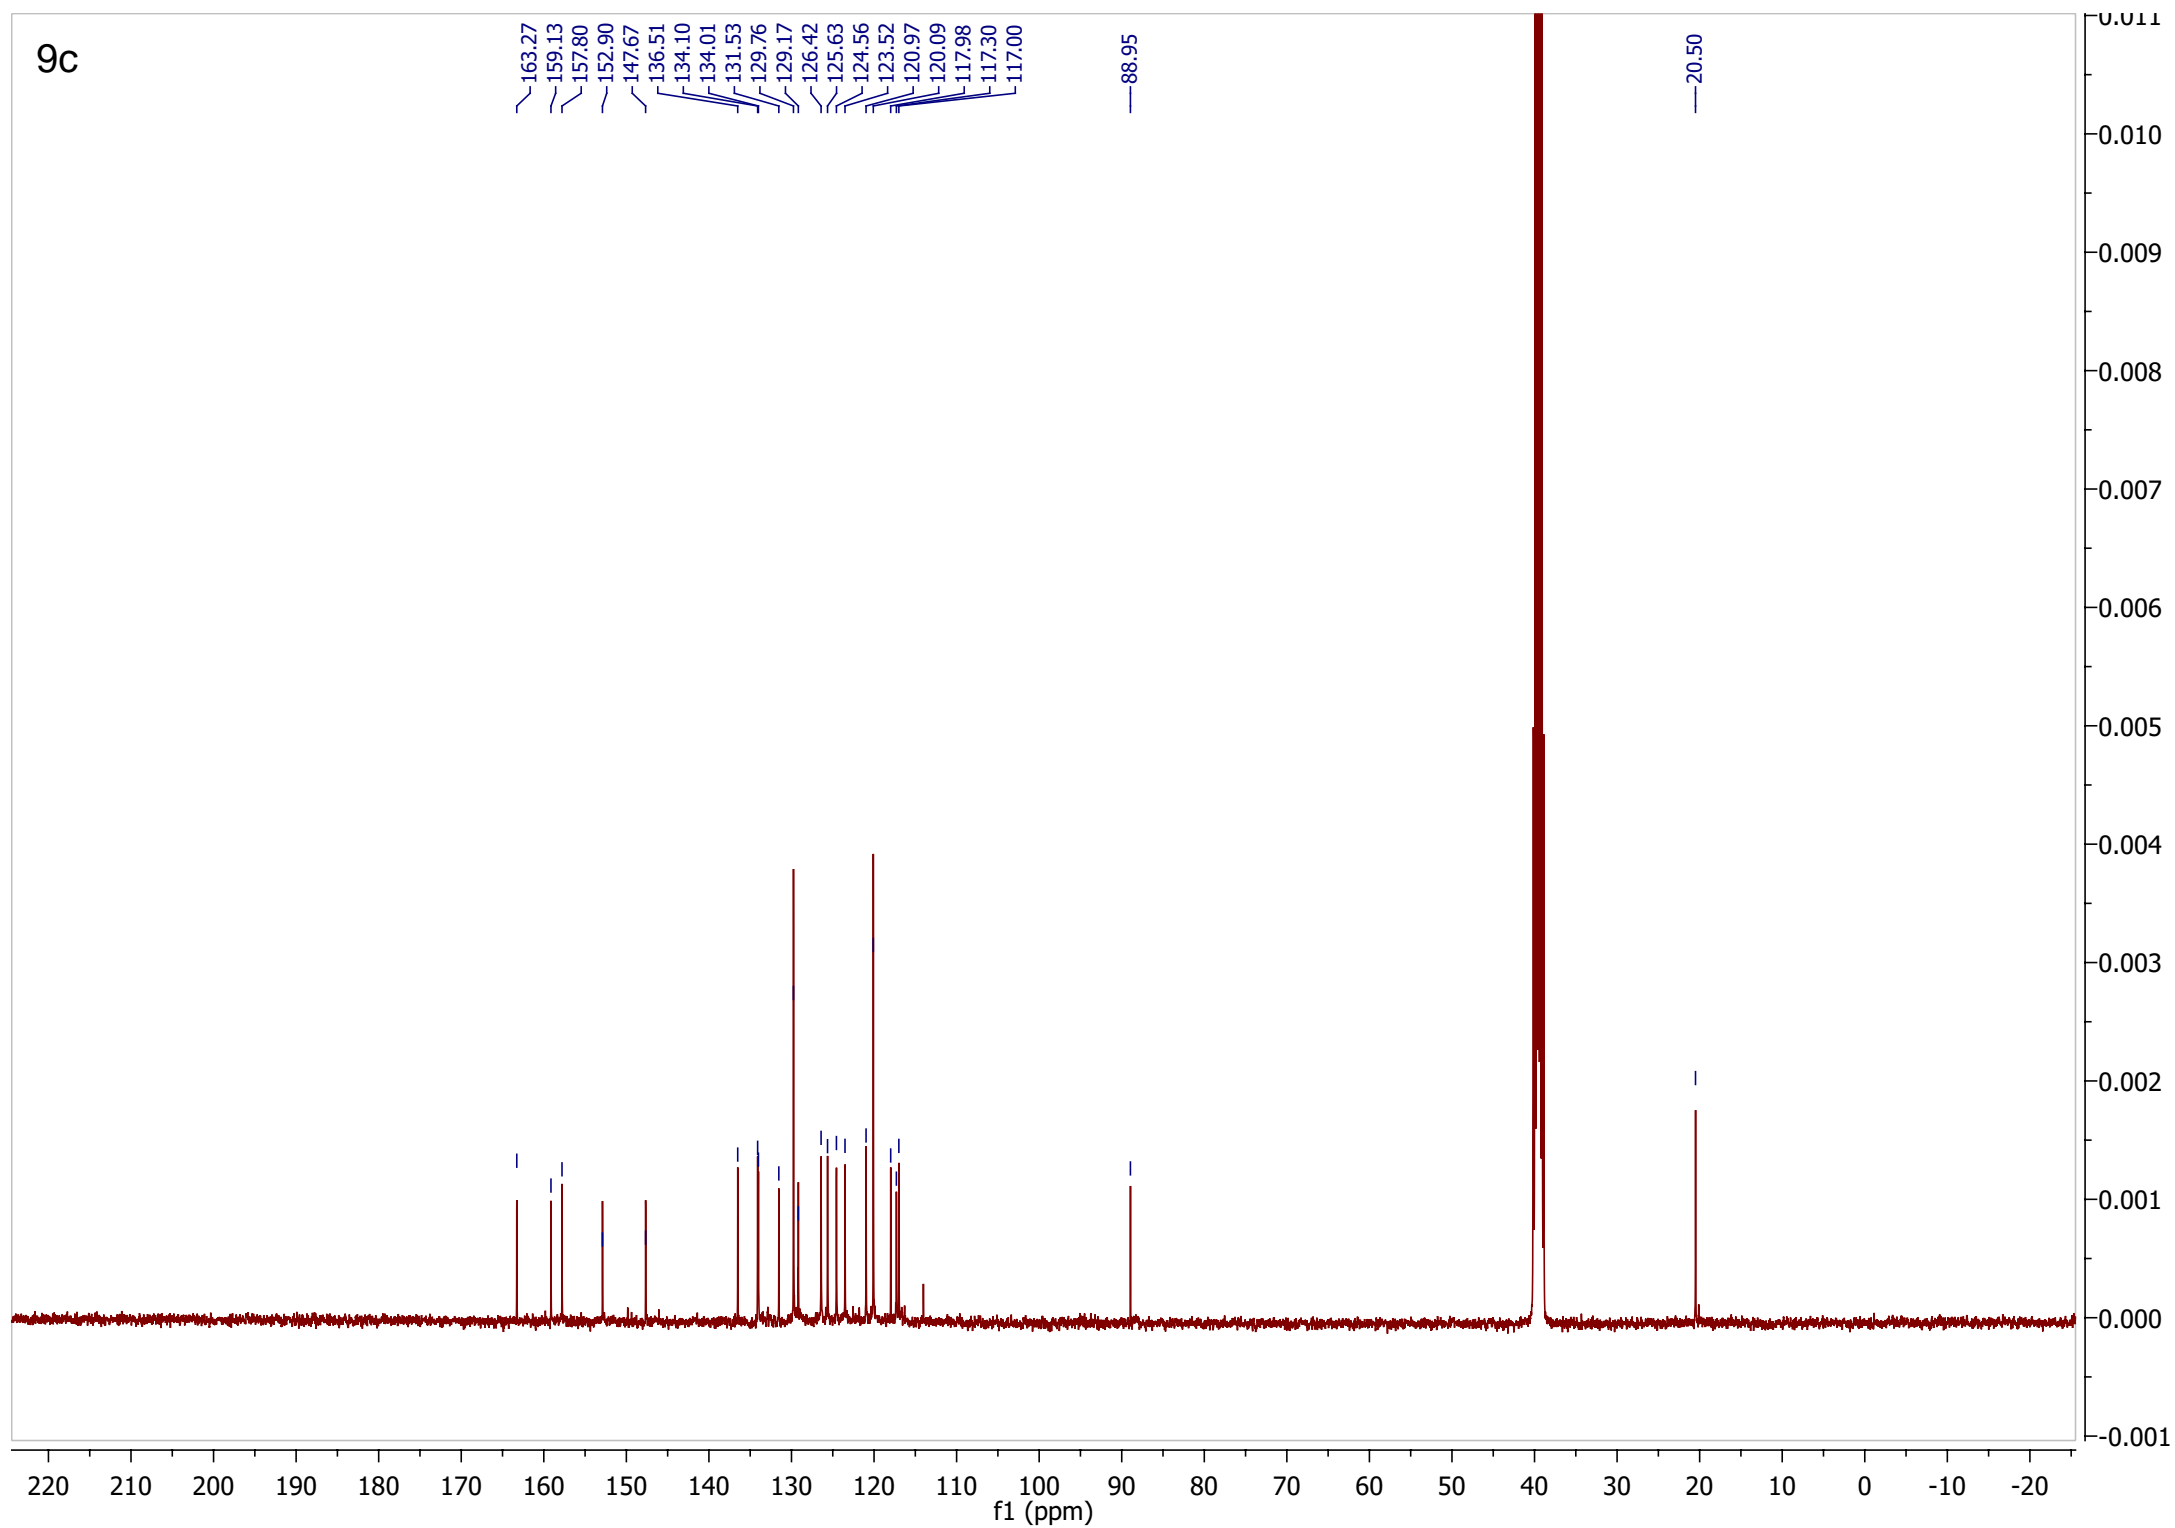

9d

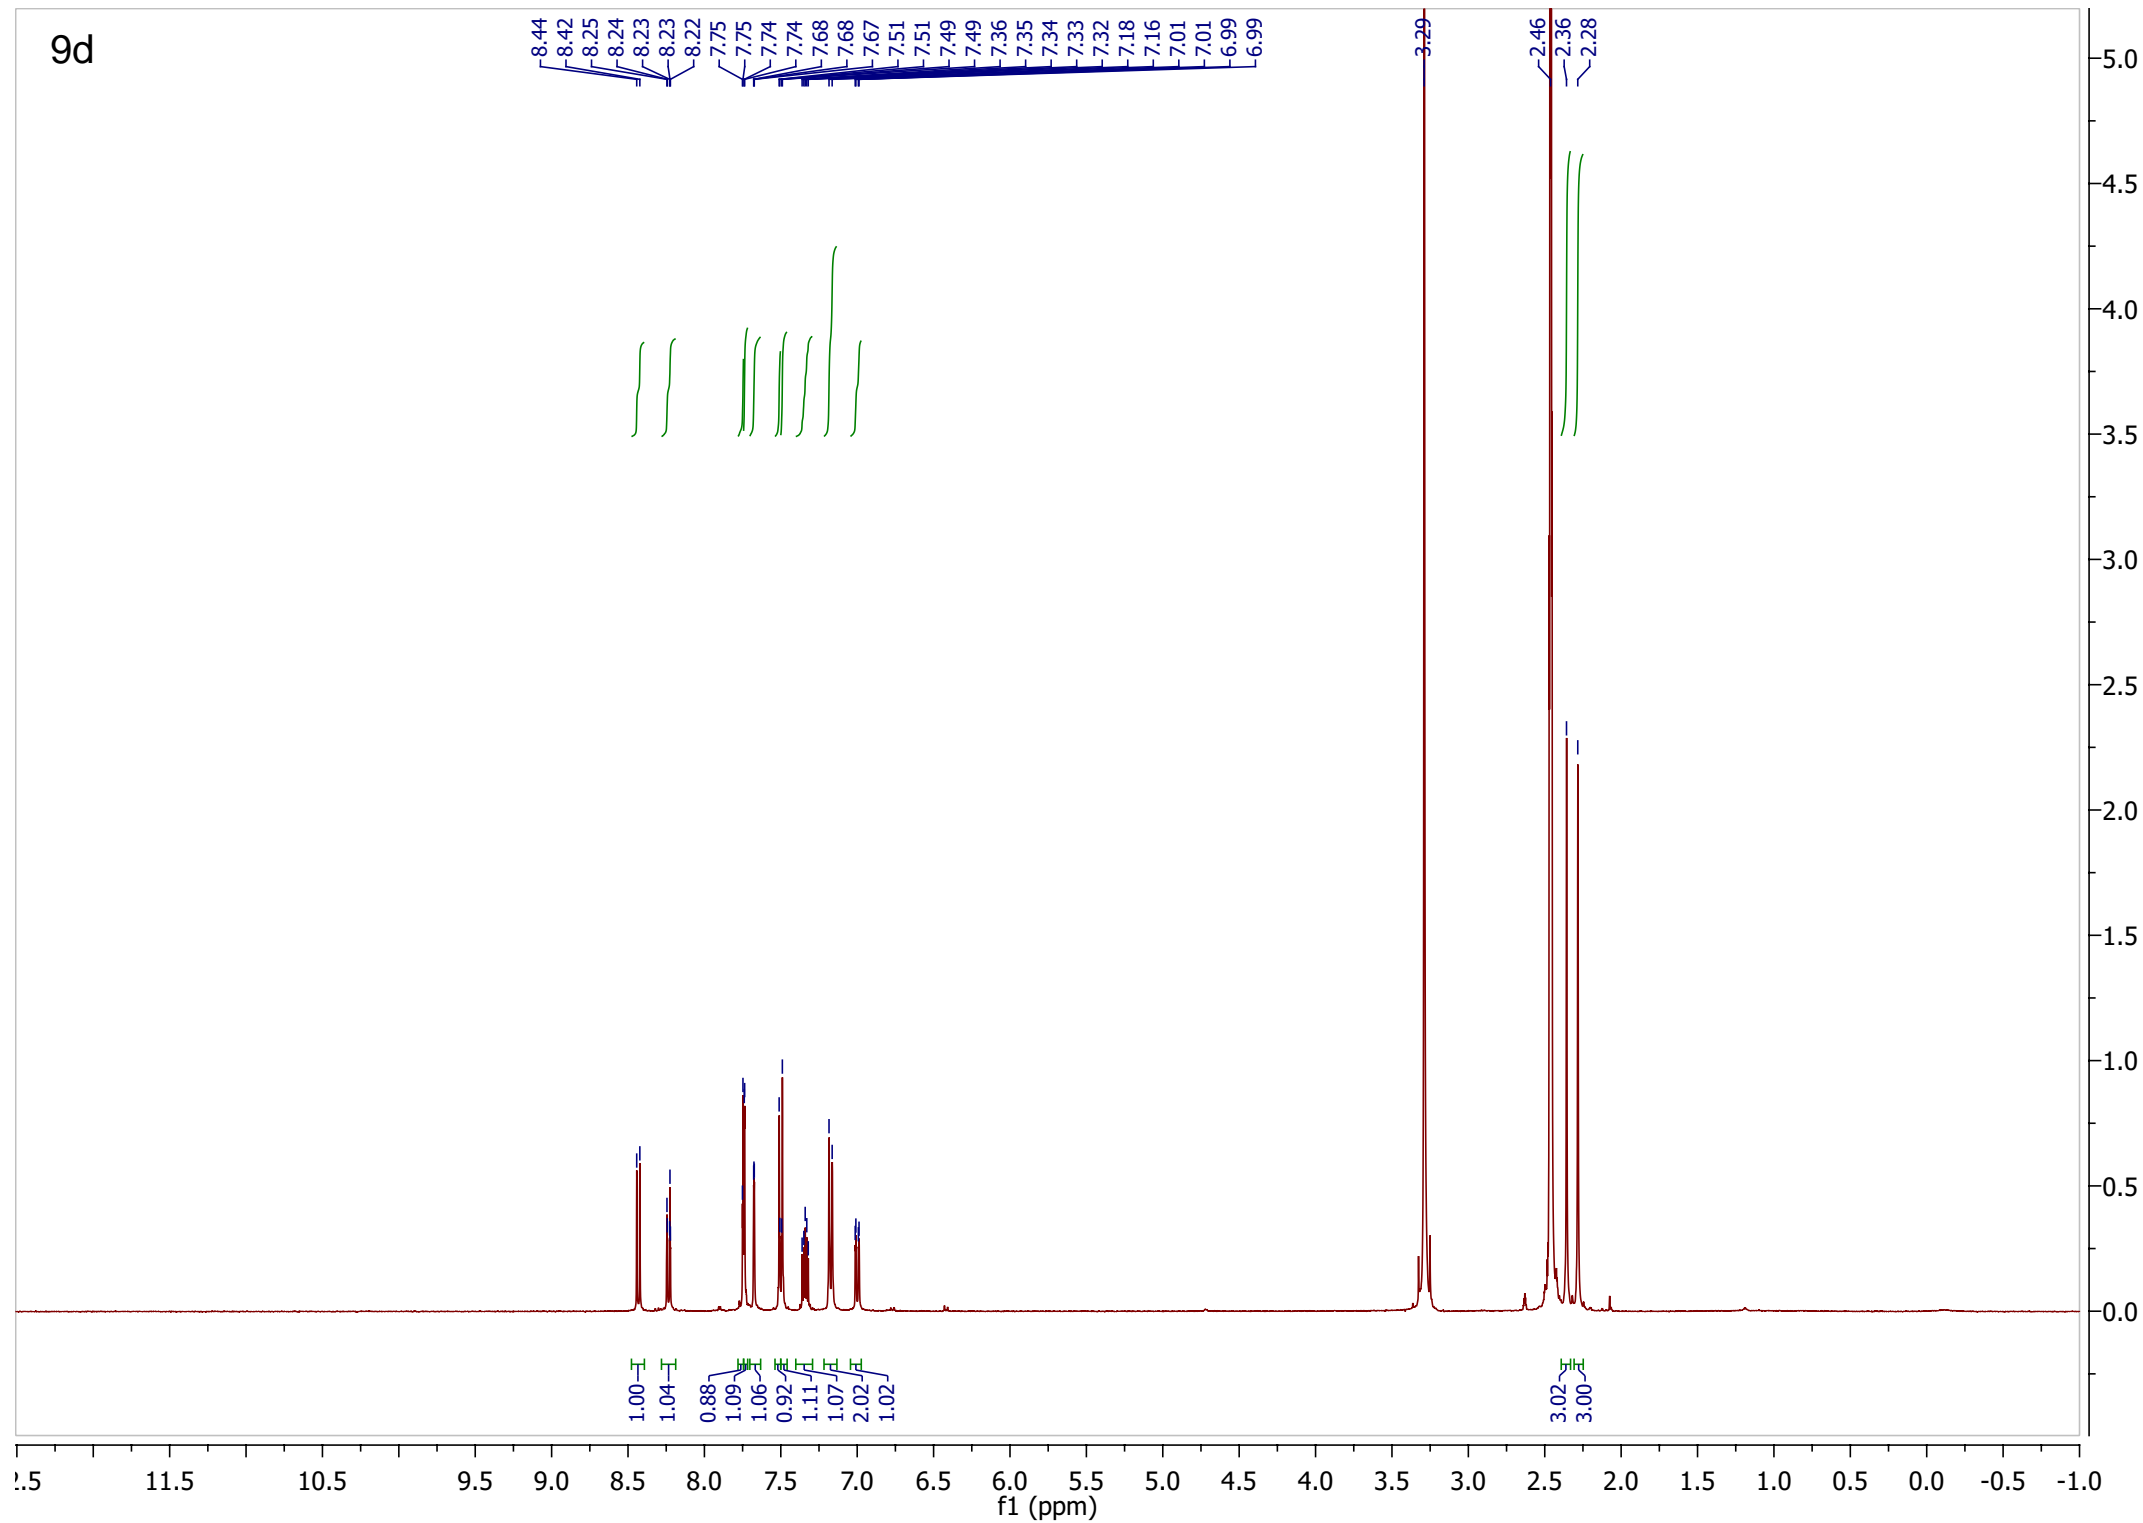

9d

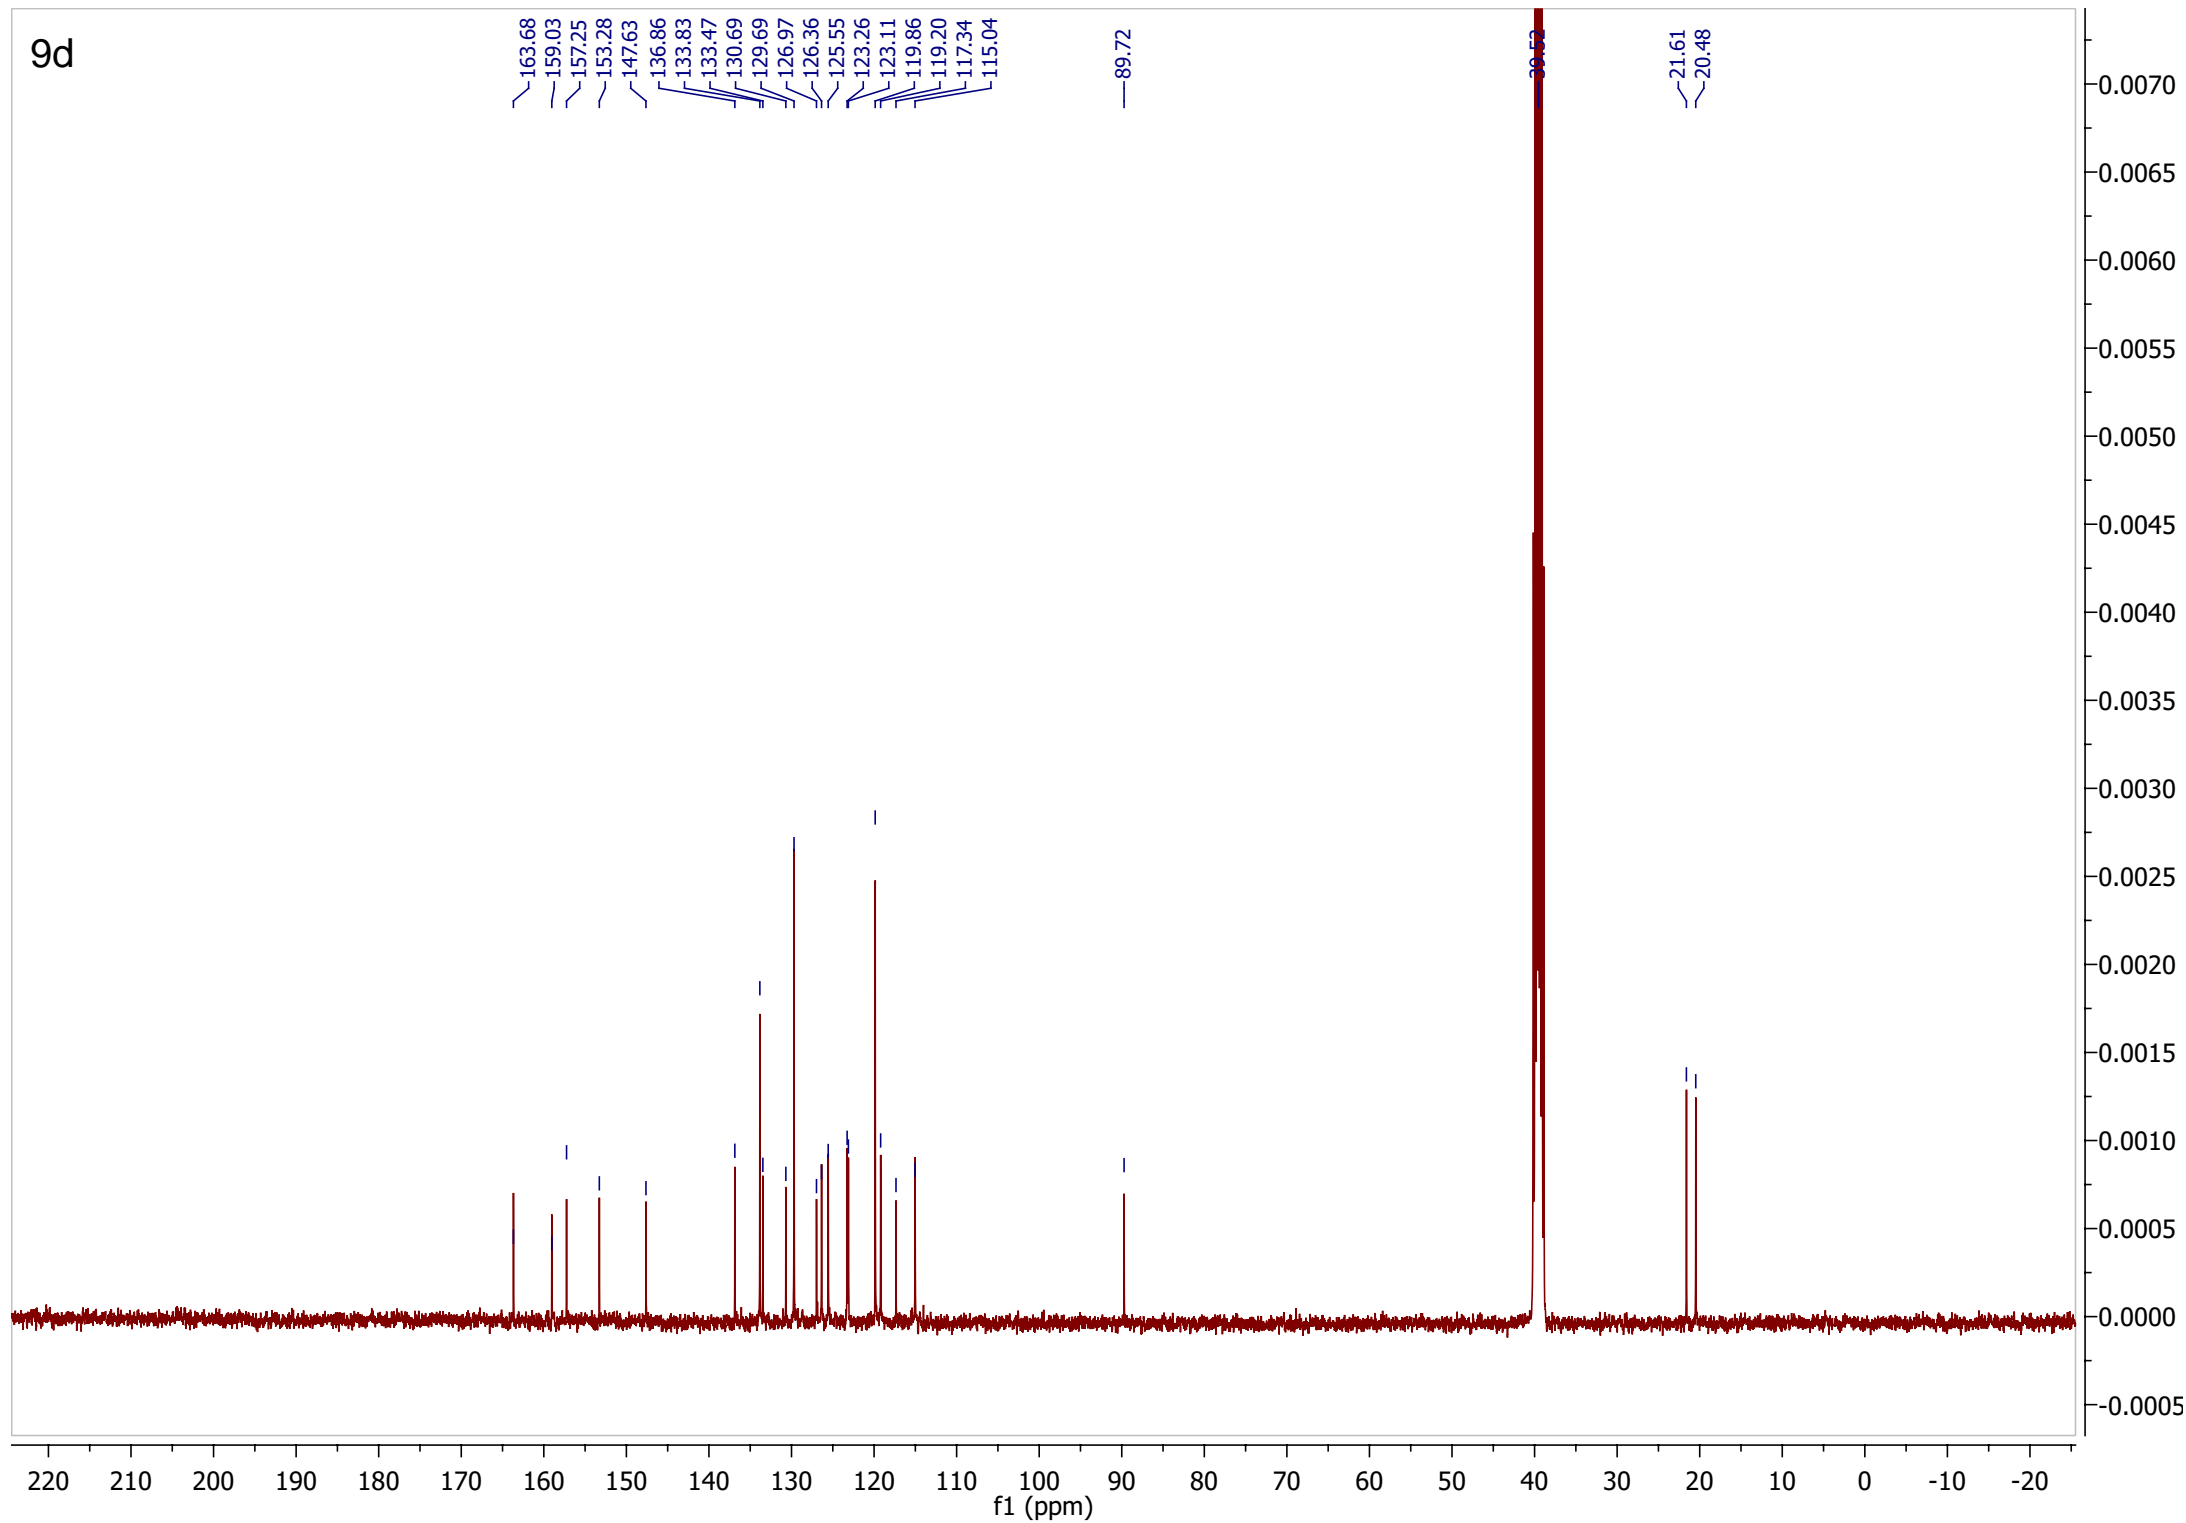

9e

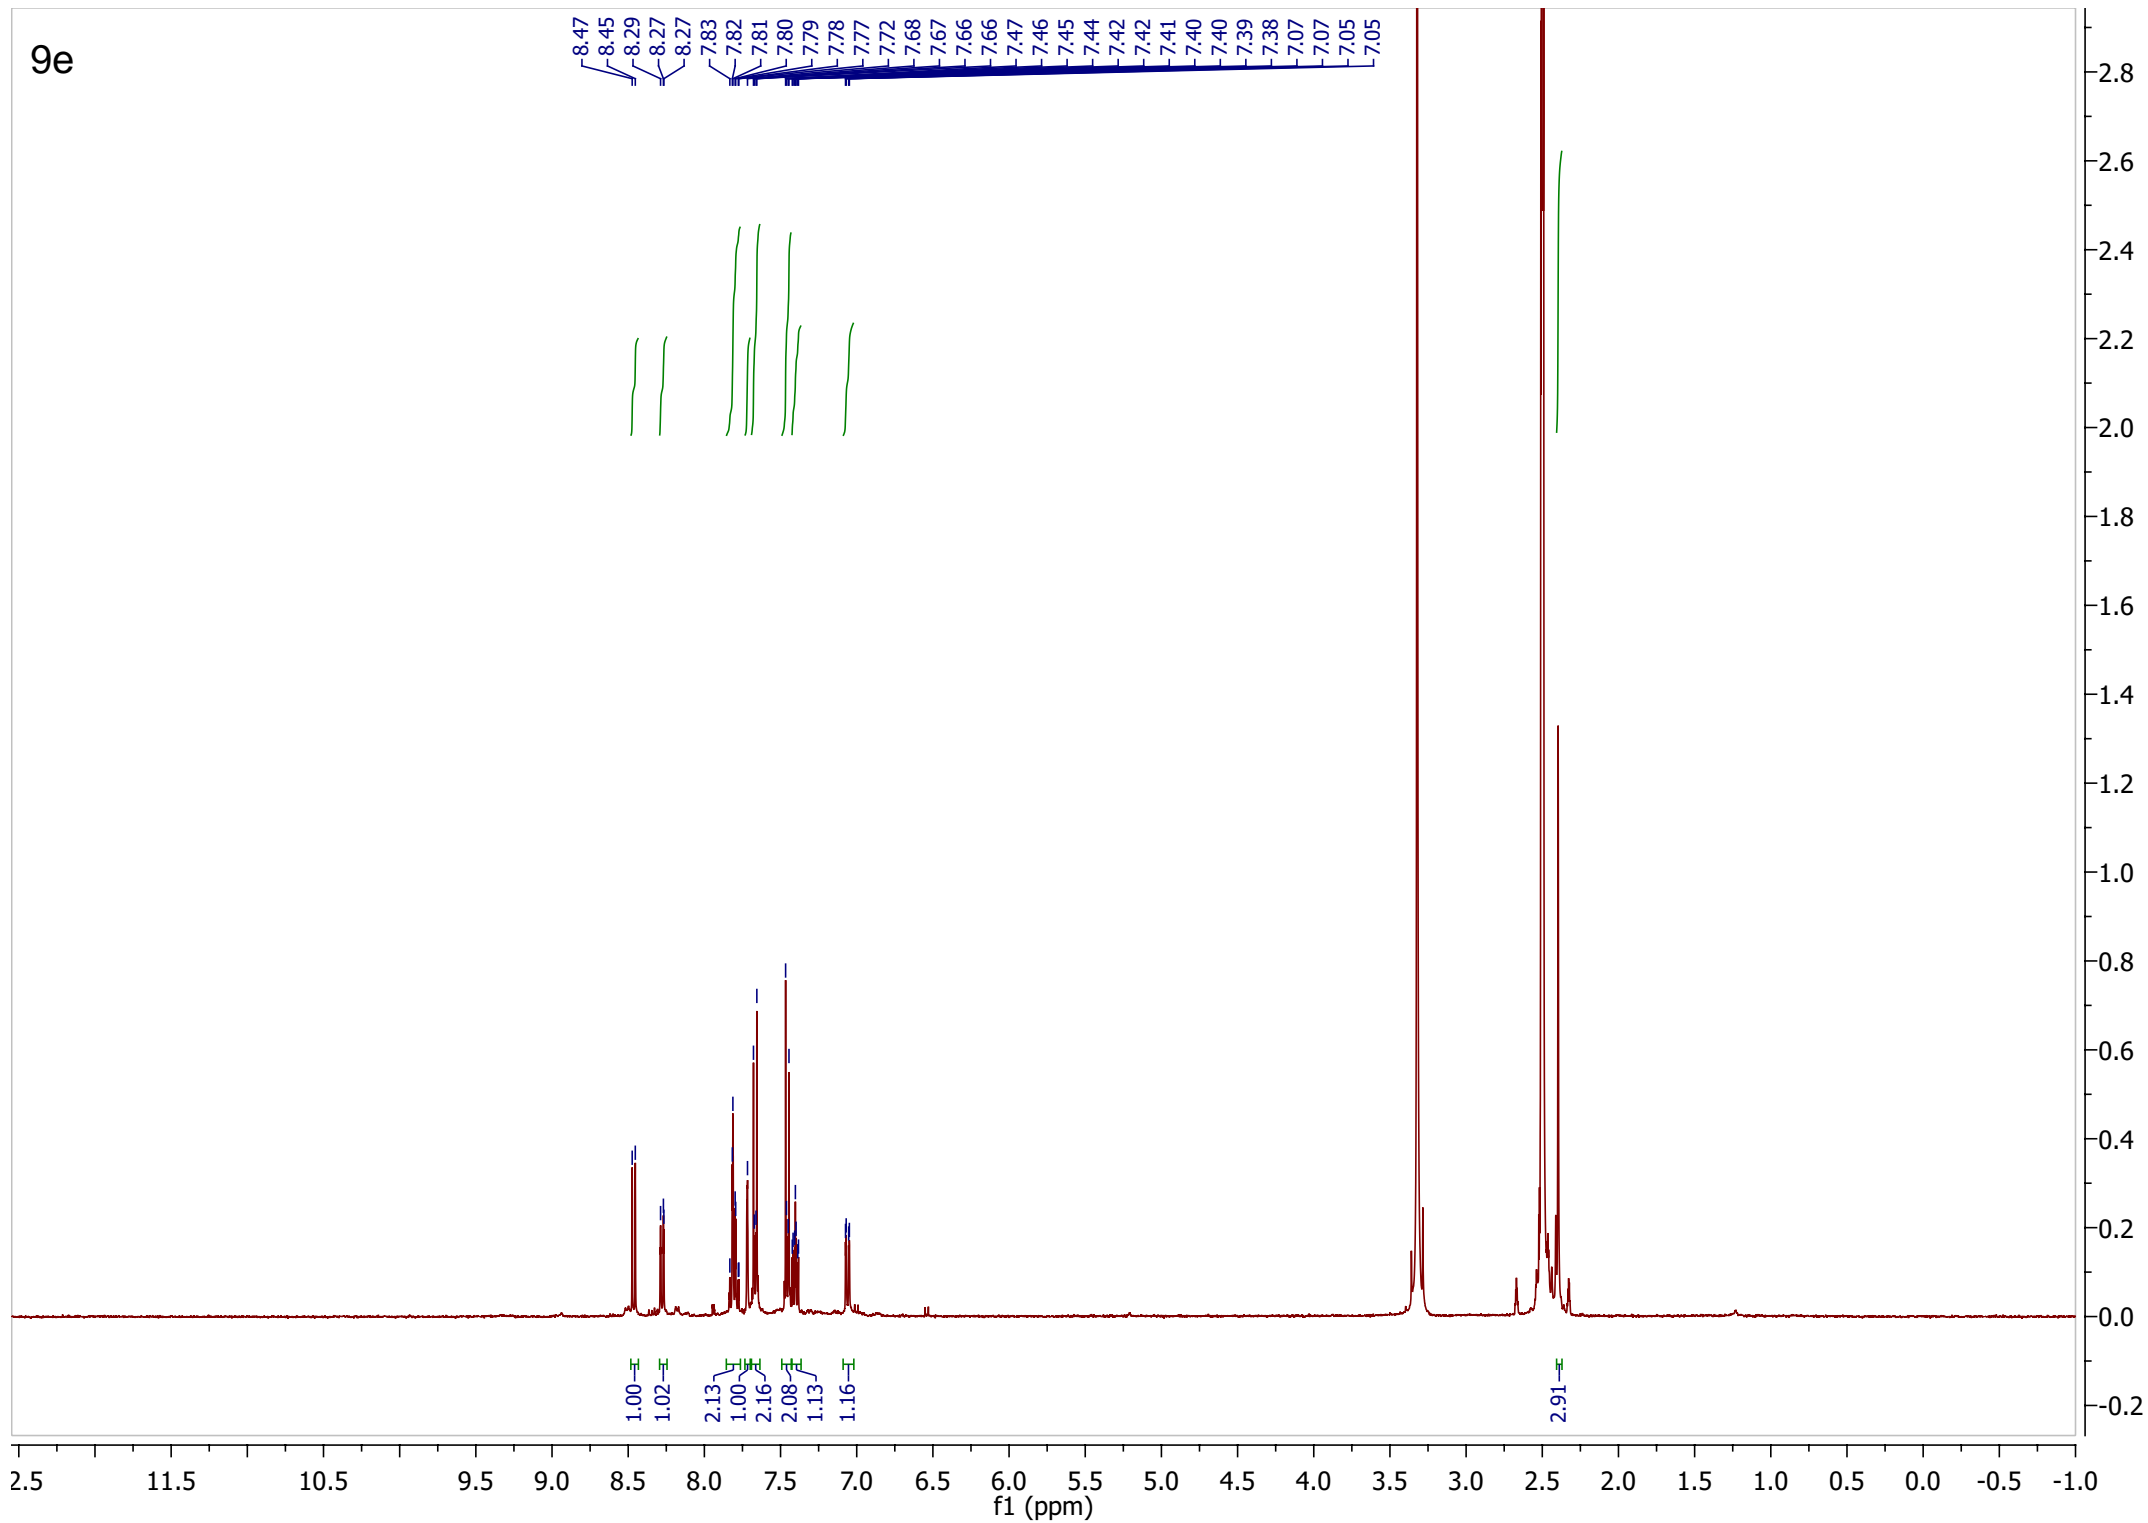

9e

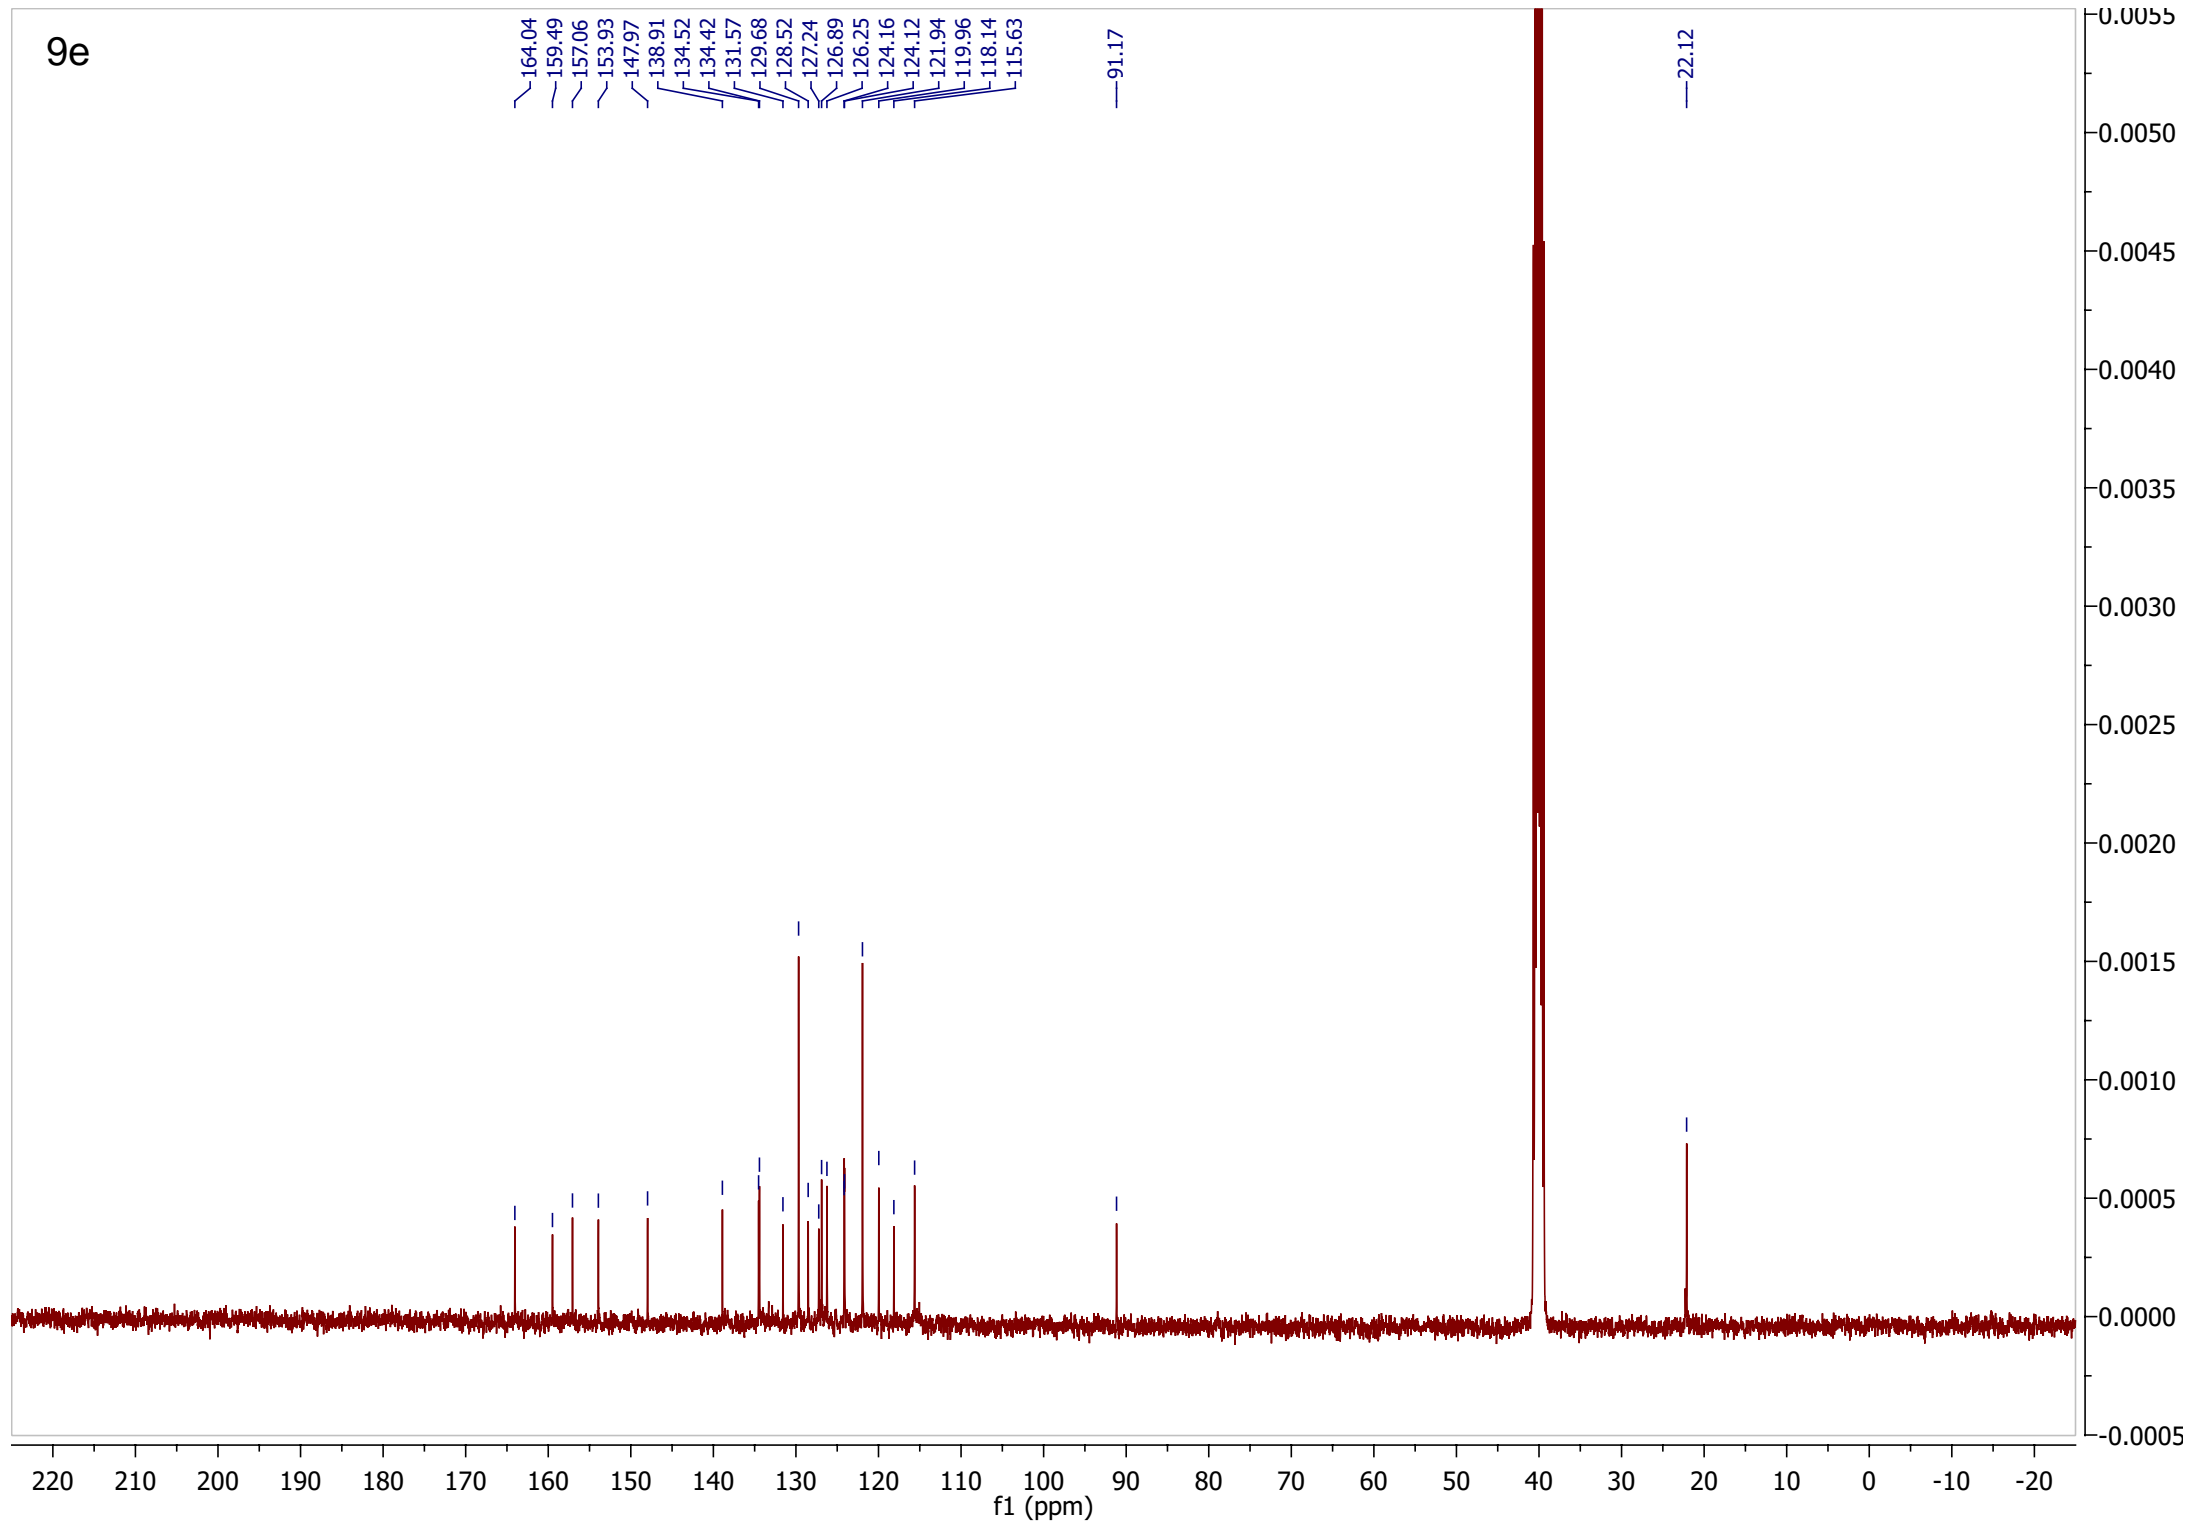

9f

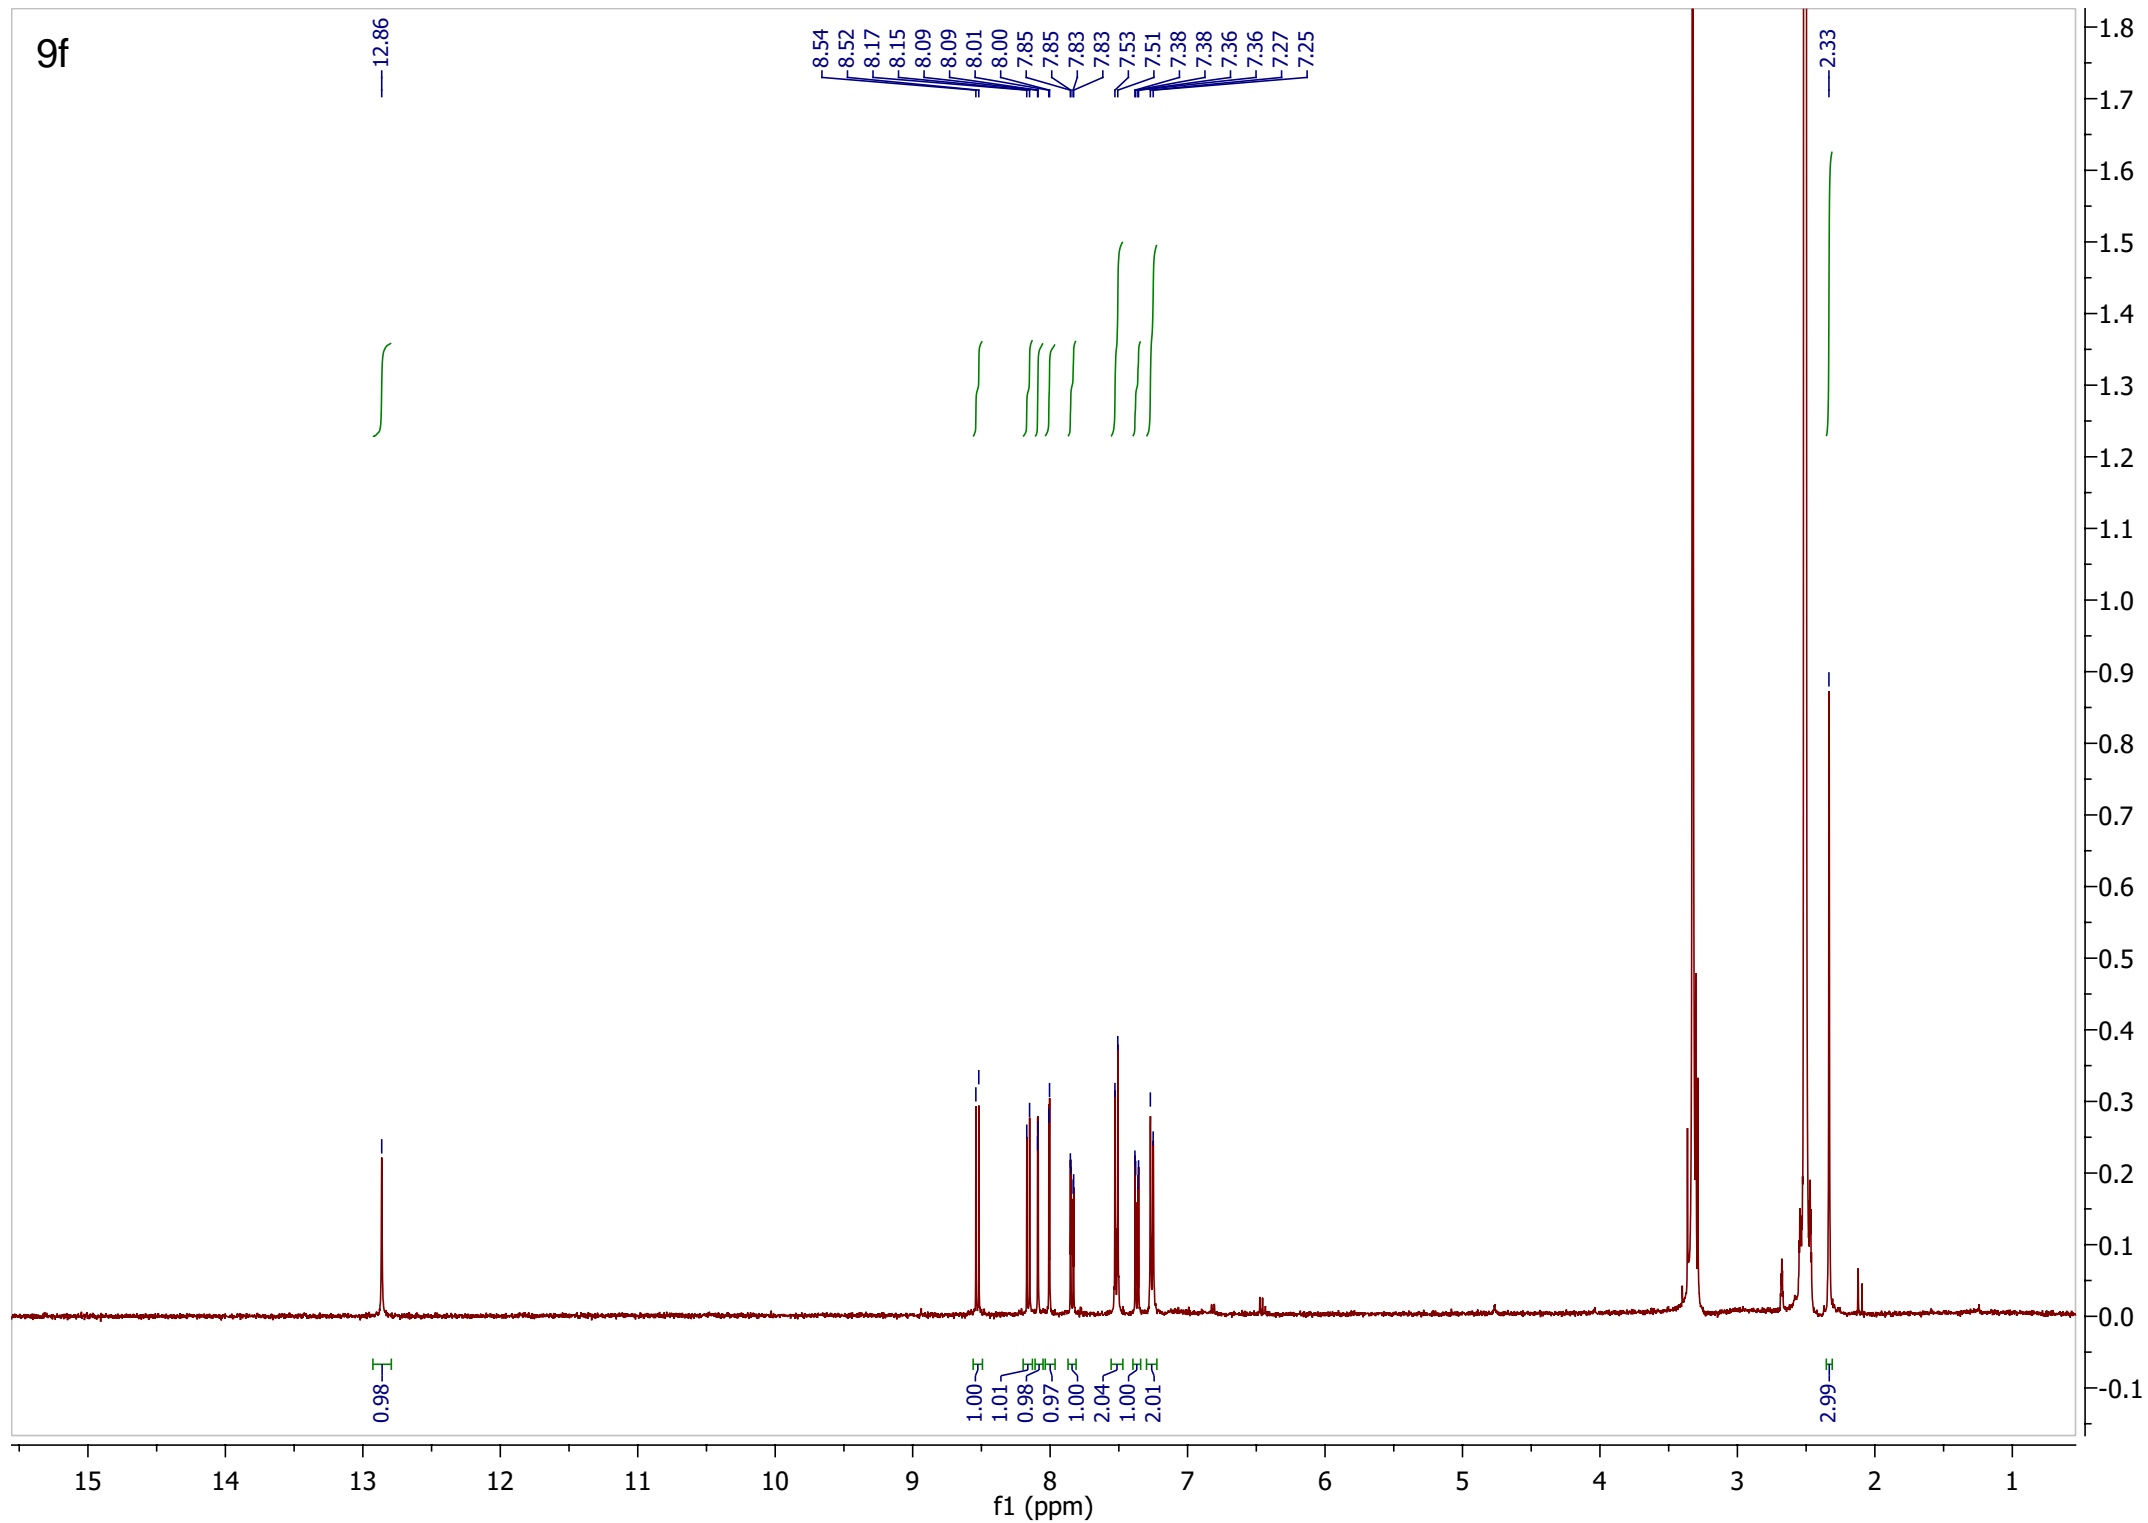

9f

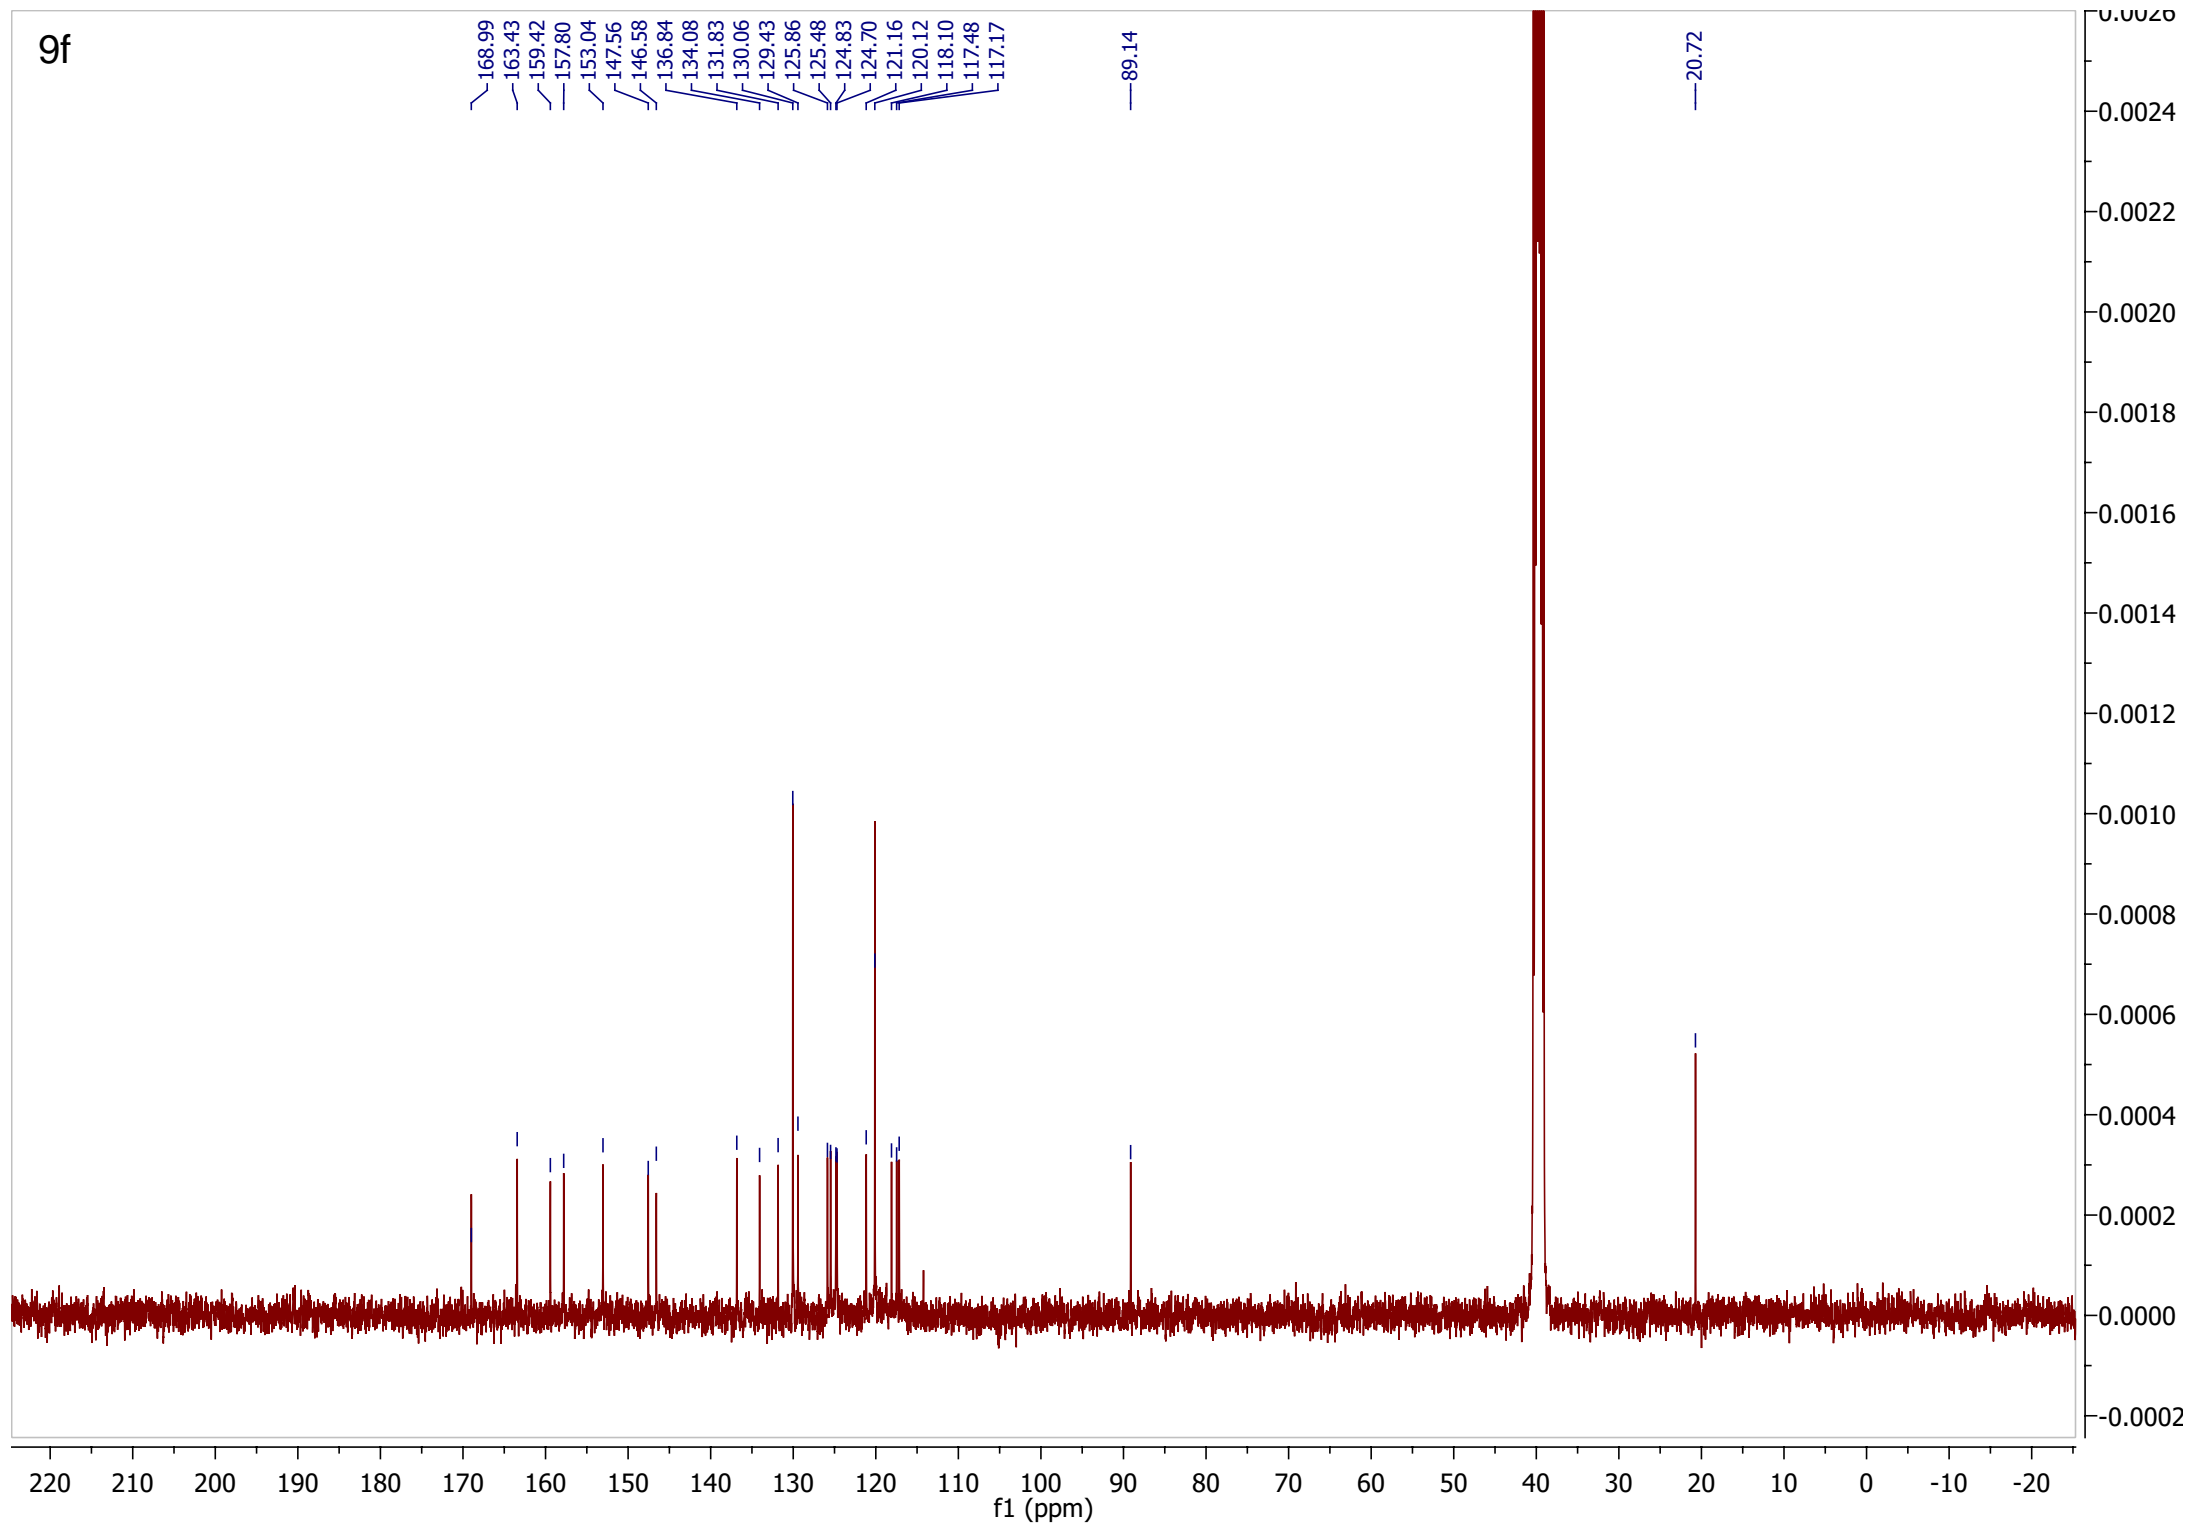



9g

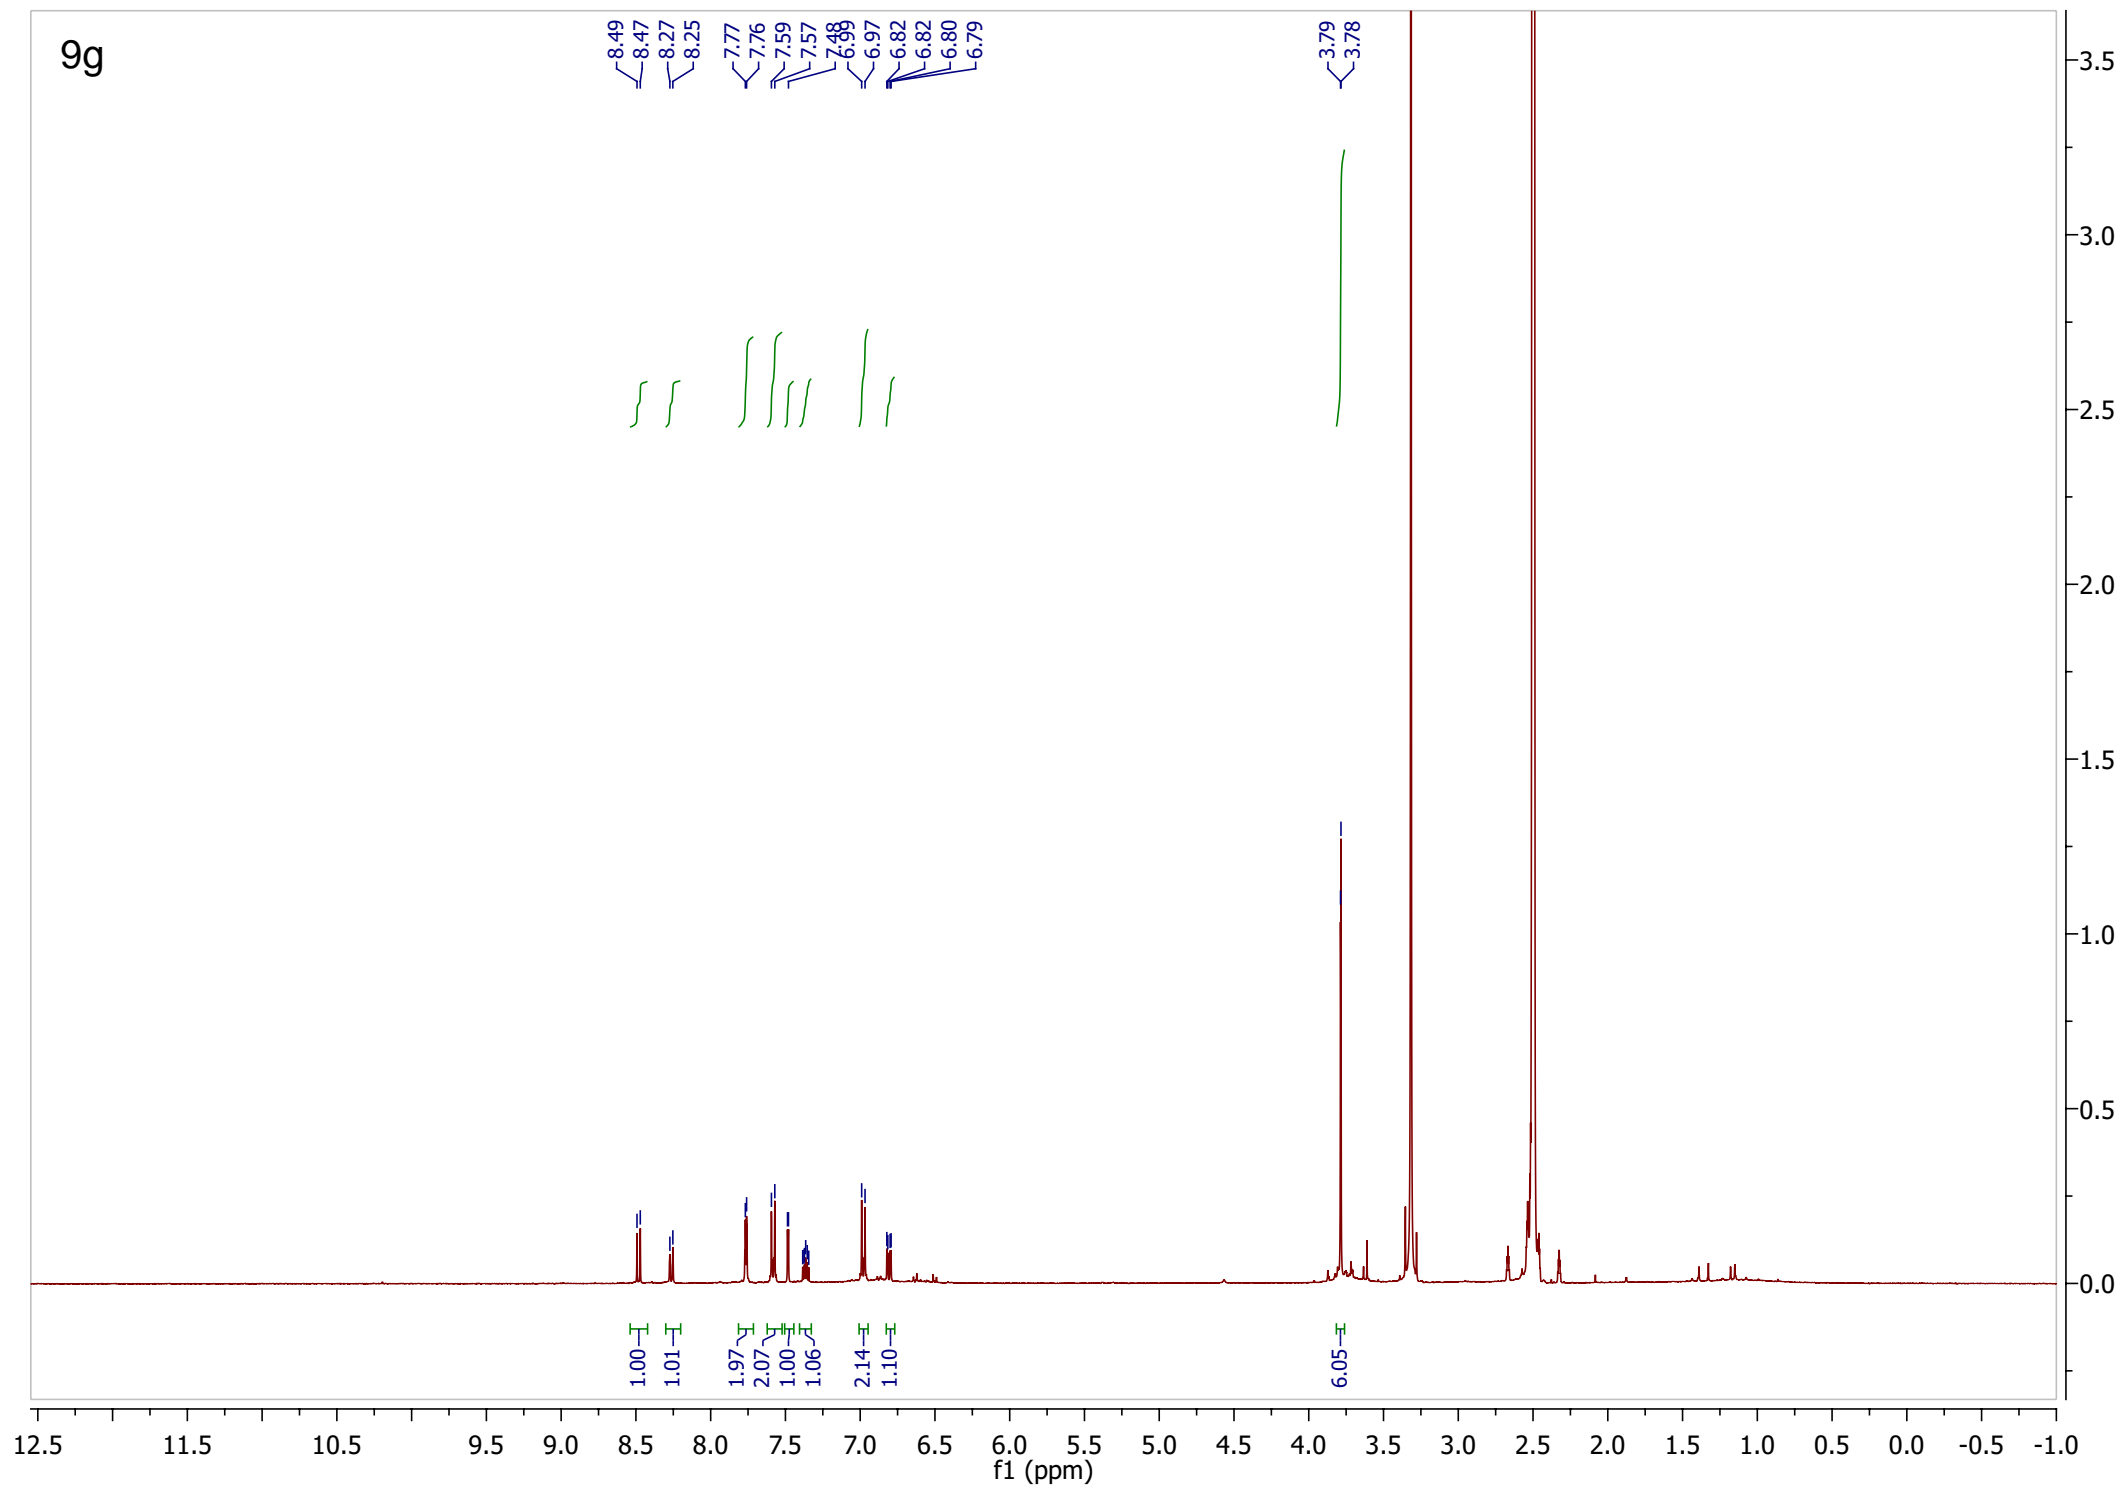

9g

163.80  
159.27  
158.27  
157.58  
156.89  
153.82  
148.08  
134.12  
132.90  
128.91  
127.31  
126.00  
123.55  
122.01  
117.71  
116.33  
114.95  
108.05  
105.06

55.83

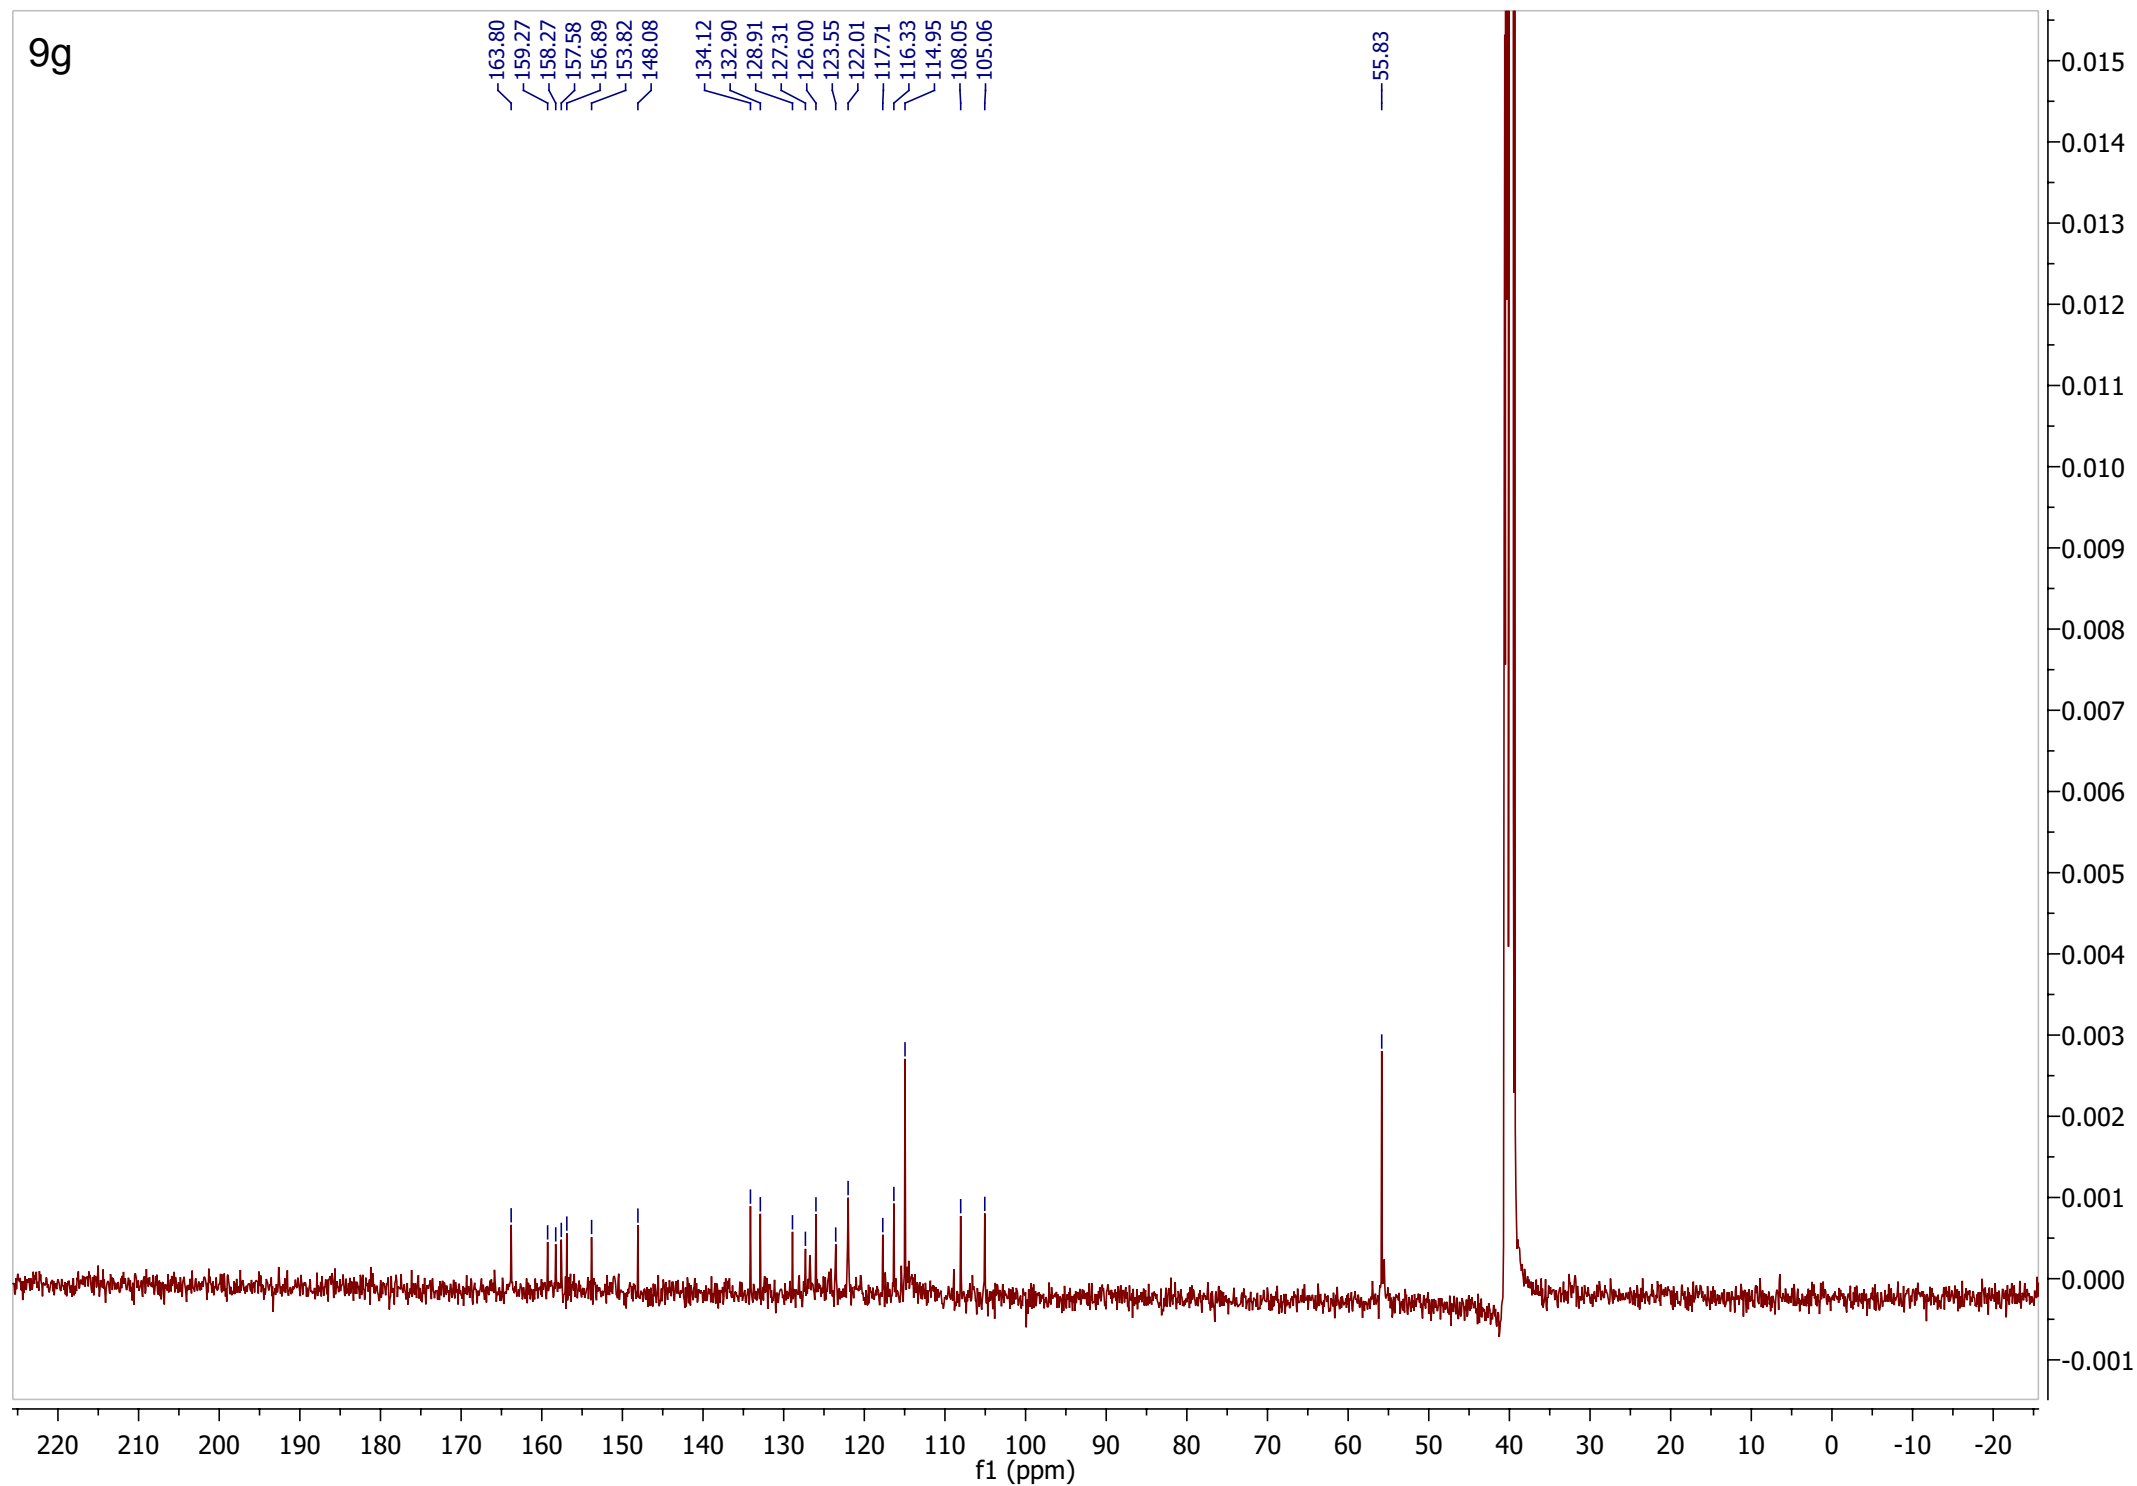

2a

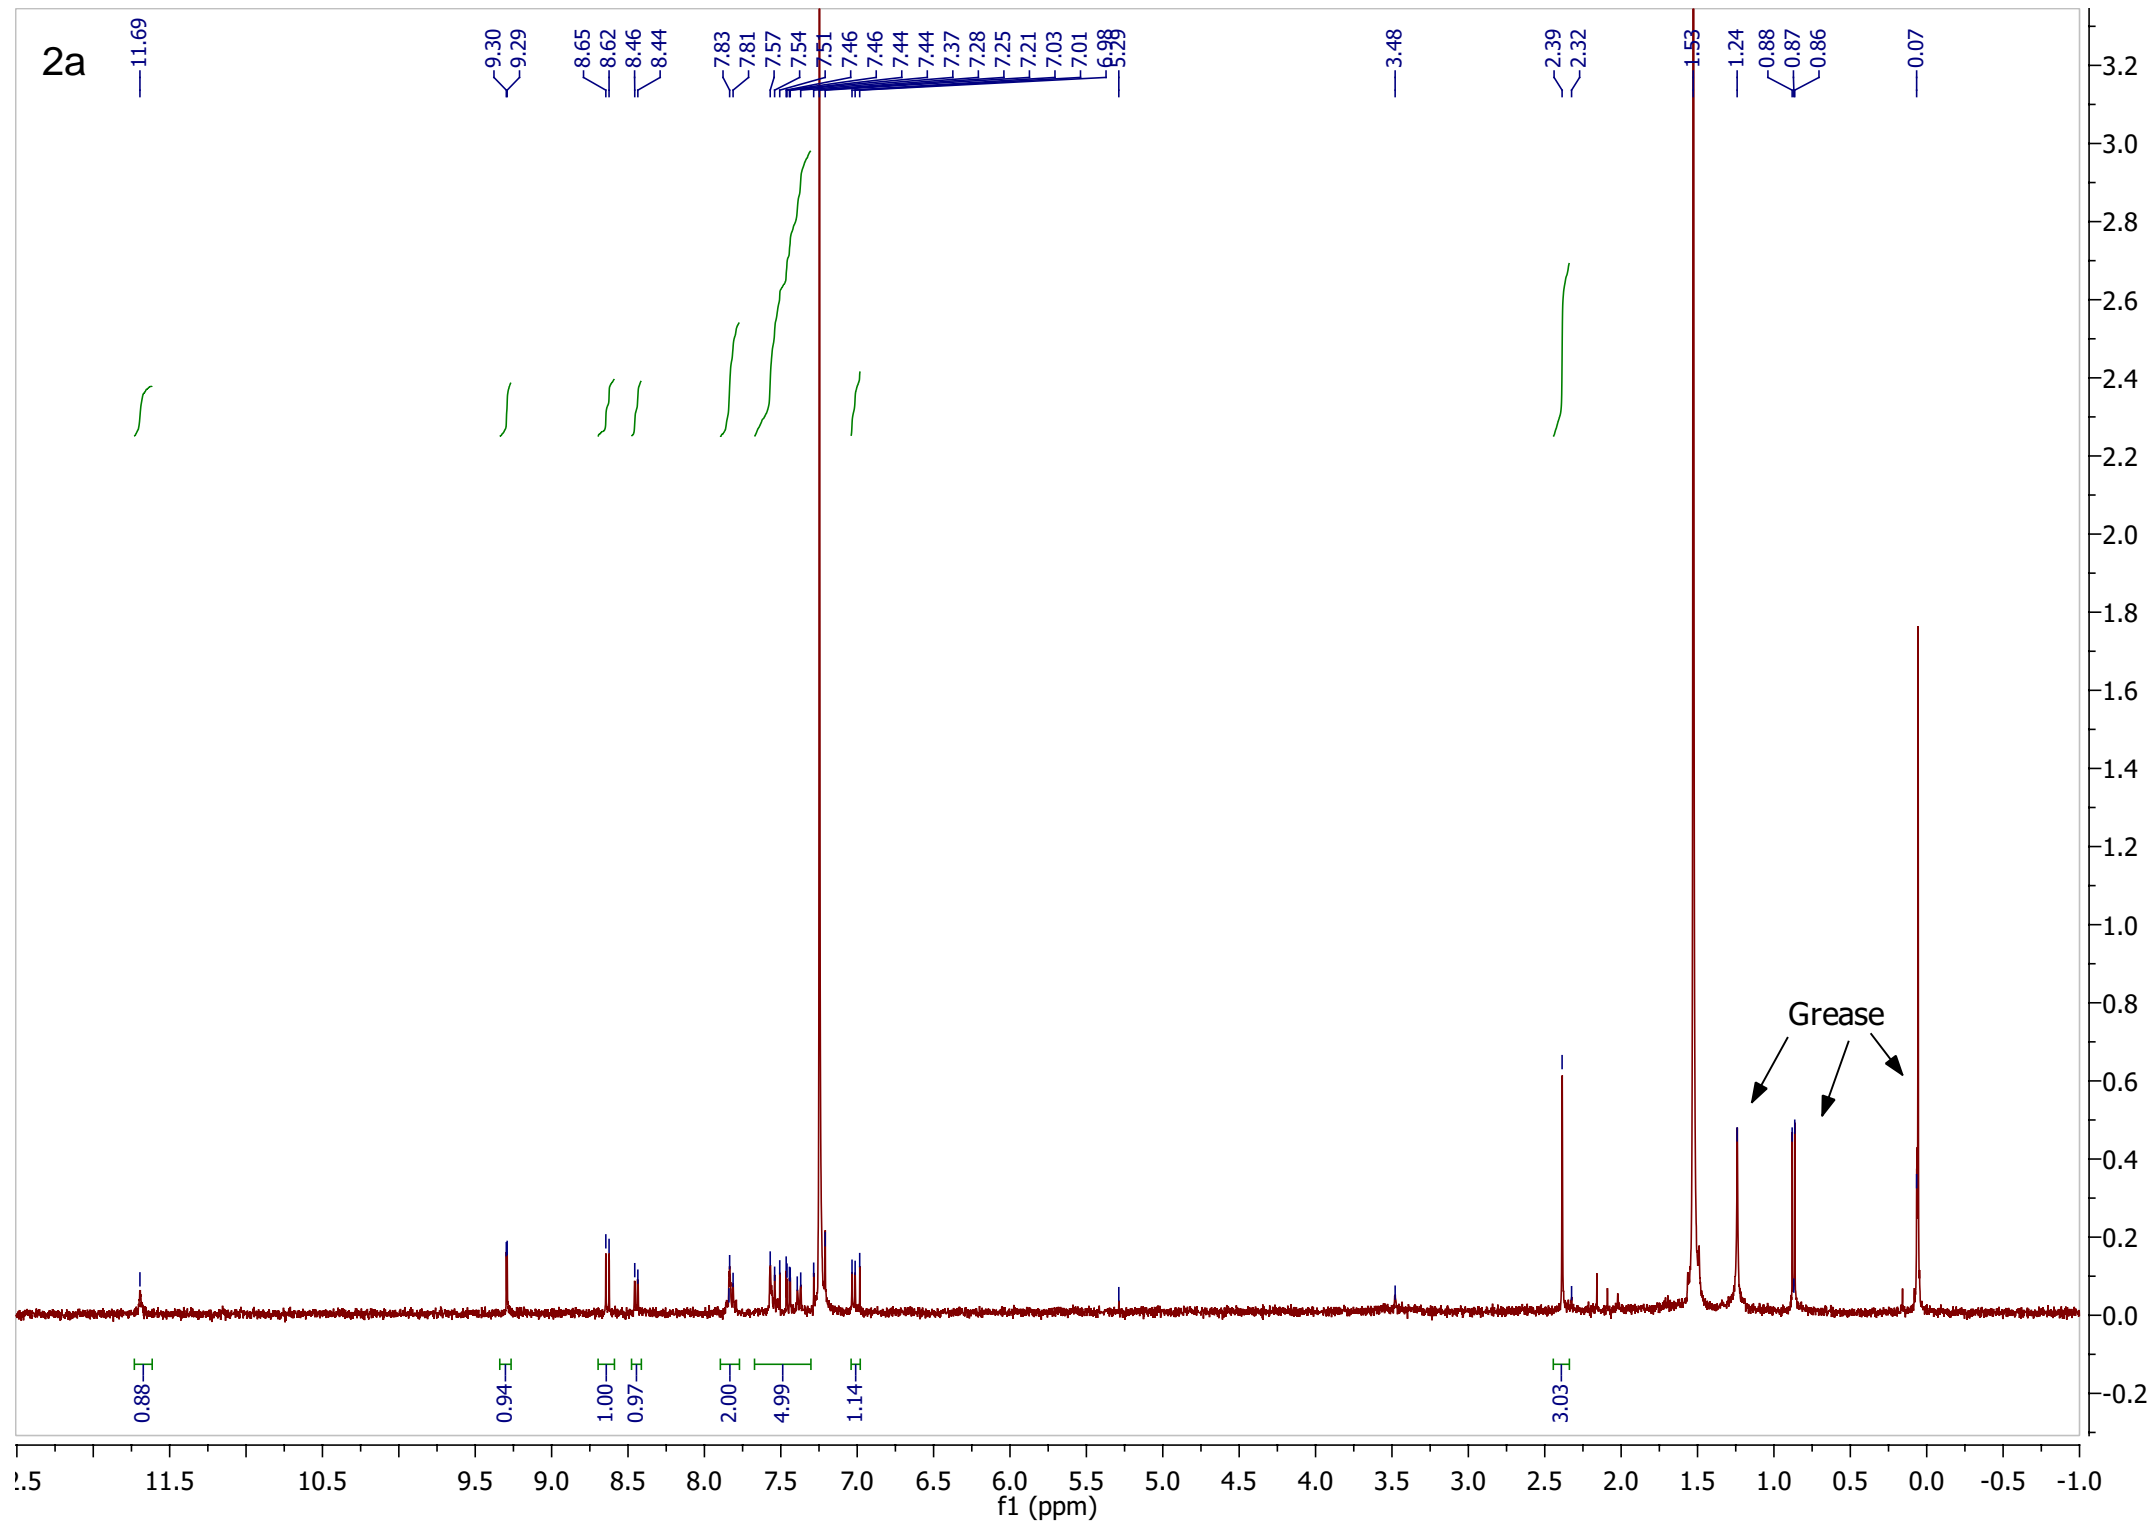

2b

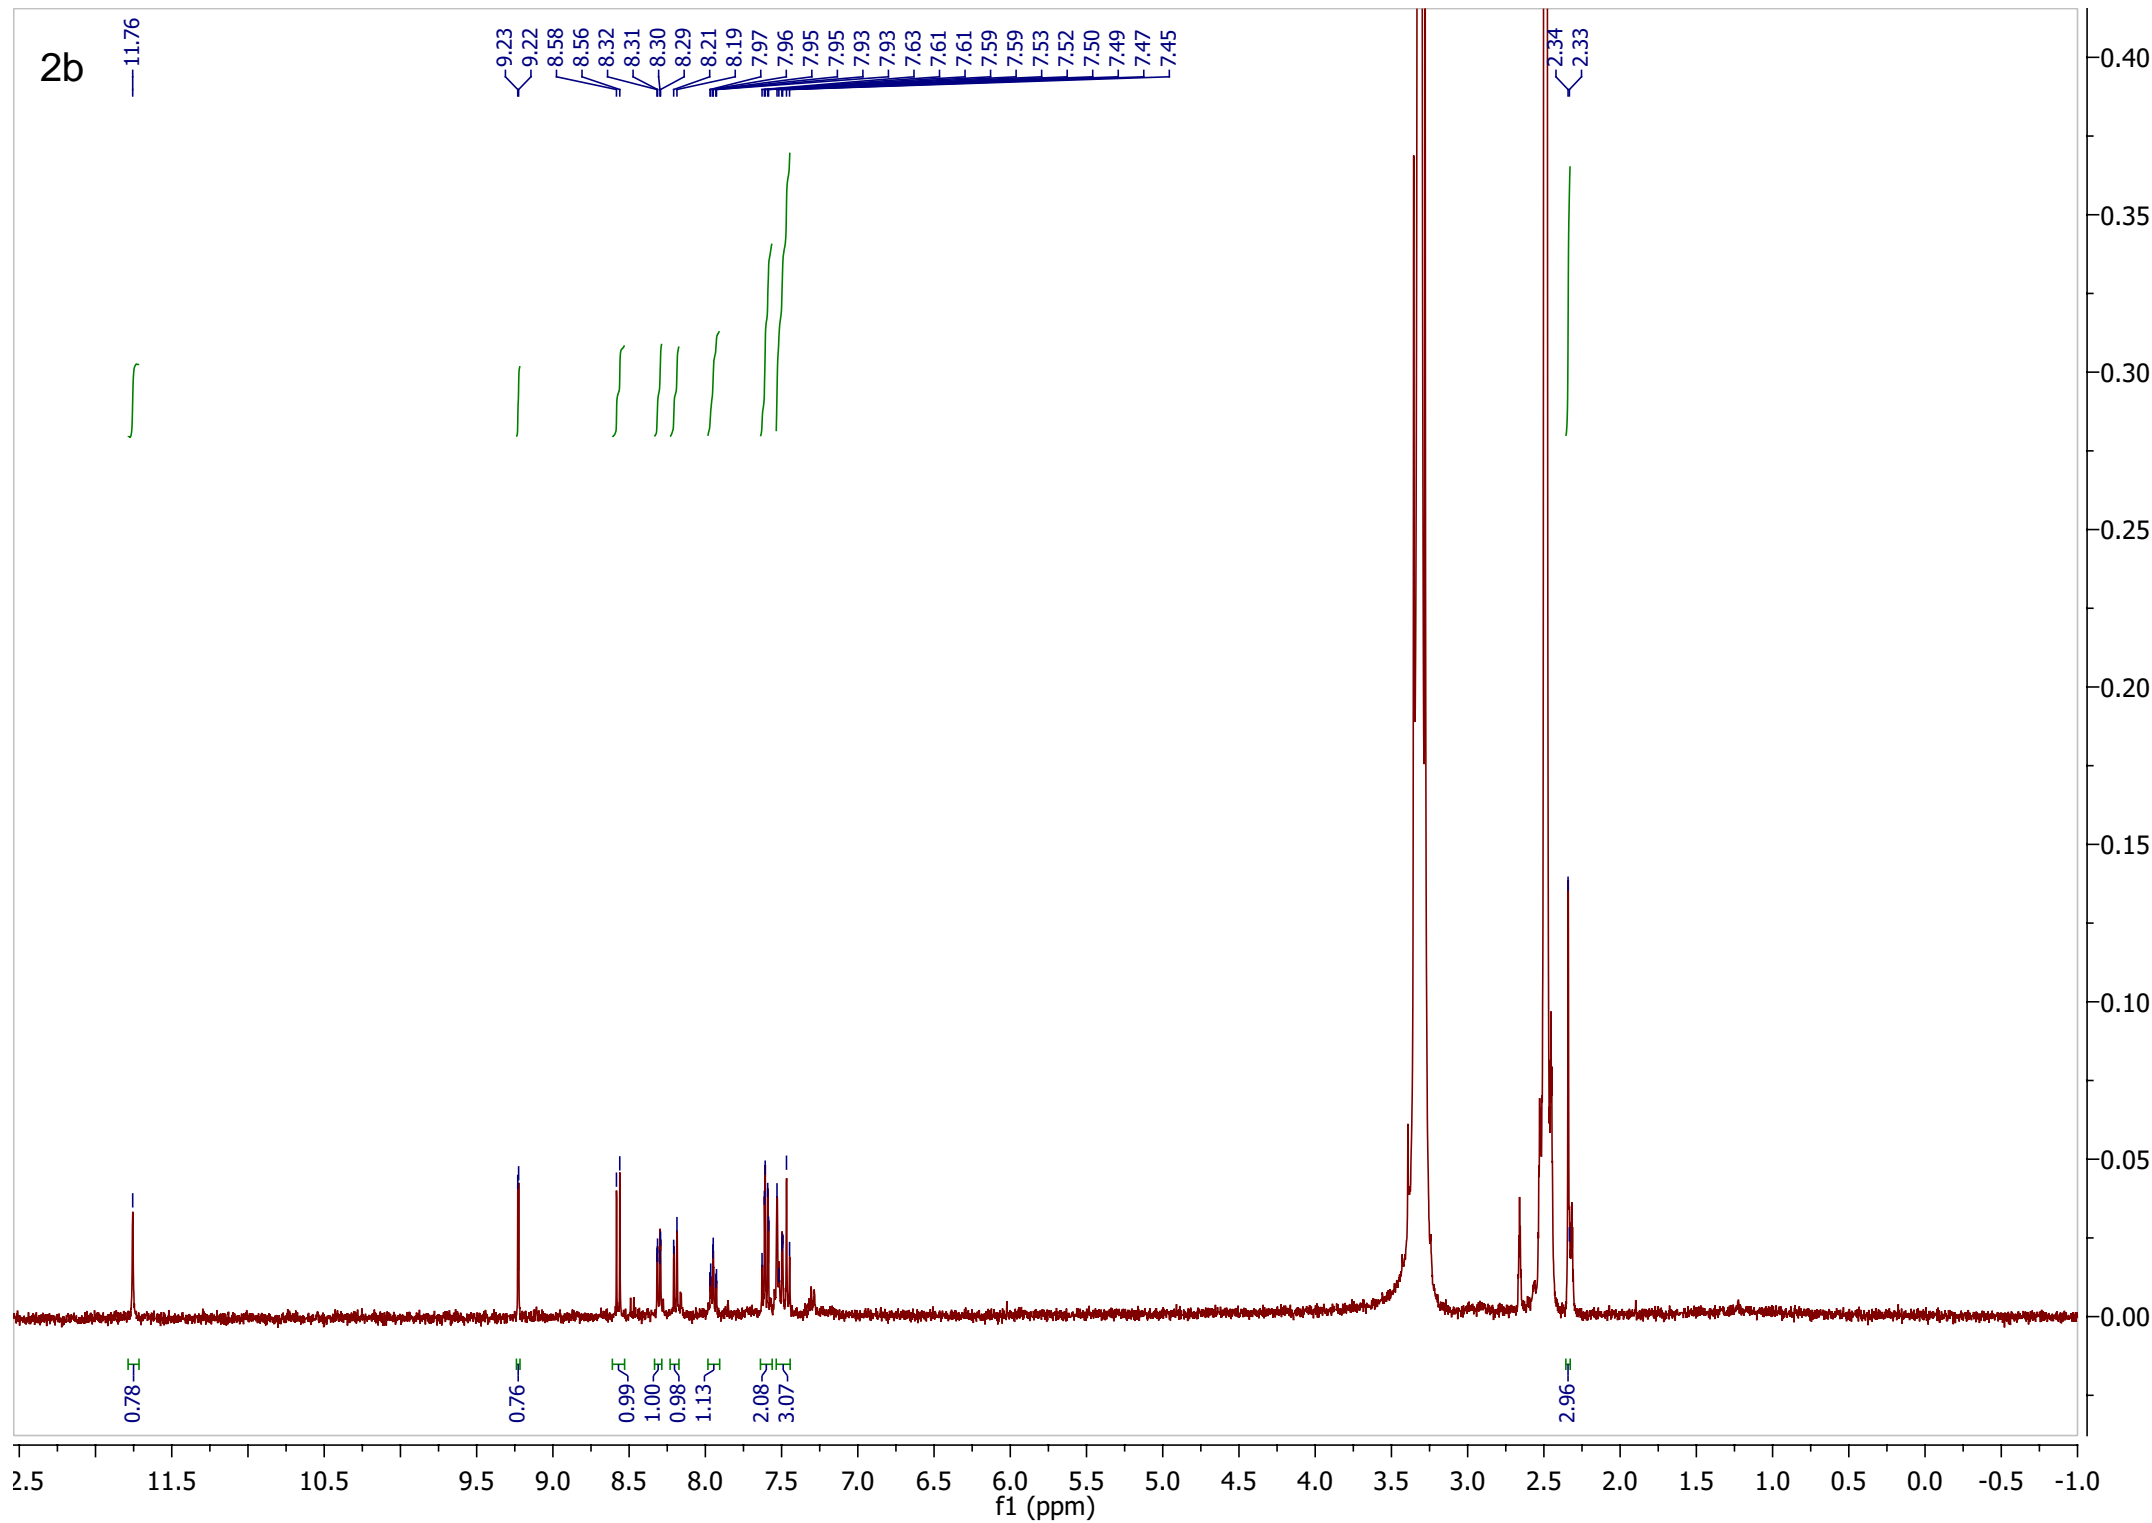

**2c**

Chemical shifts (ppm): 11.79, 9.41, 9.40, 8.55, 8.53, 8.34, 8.34, 8.32, 8.32, 8.23, 8.21, 7.99, 7.99, 7.97, 7.97, 7.95, 7.95, 7.77, 7.76, 7.74, 7.74, 7.65, 7.63, 7.61, 7.56, 7.54, 7.54, 7.52, 7.52, 7.50, 7.48, 2.36.

Integration values: 0.99, 1.00, 1.02, 1.07, 1.08, 1.10, 1.02, 0.96, 3.14, 2.99.

2d

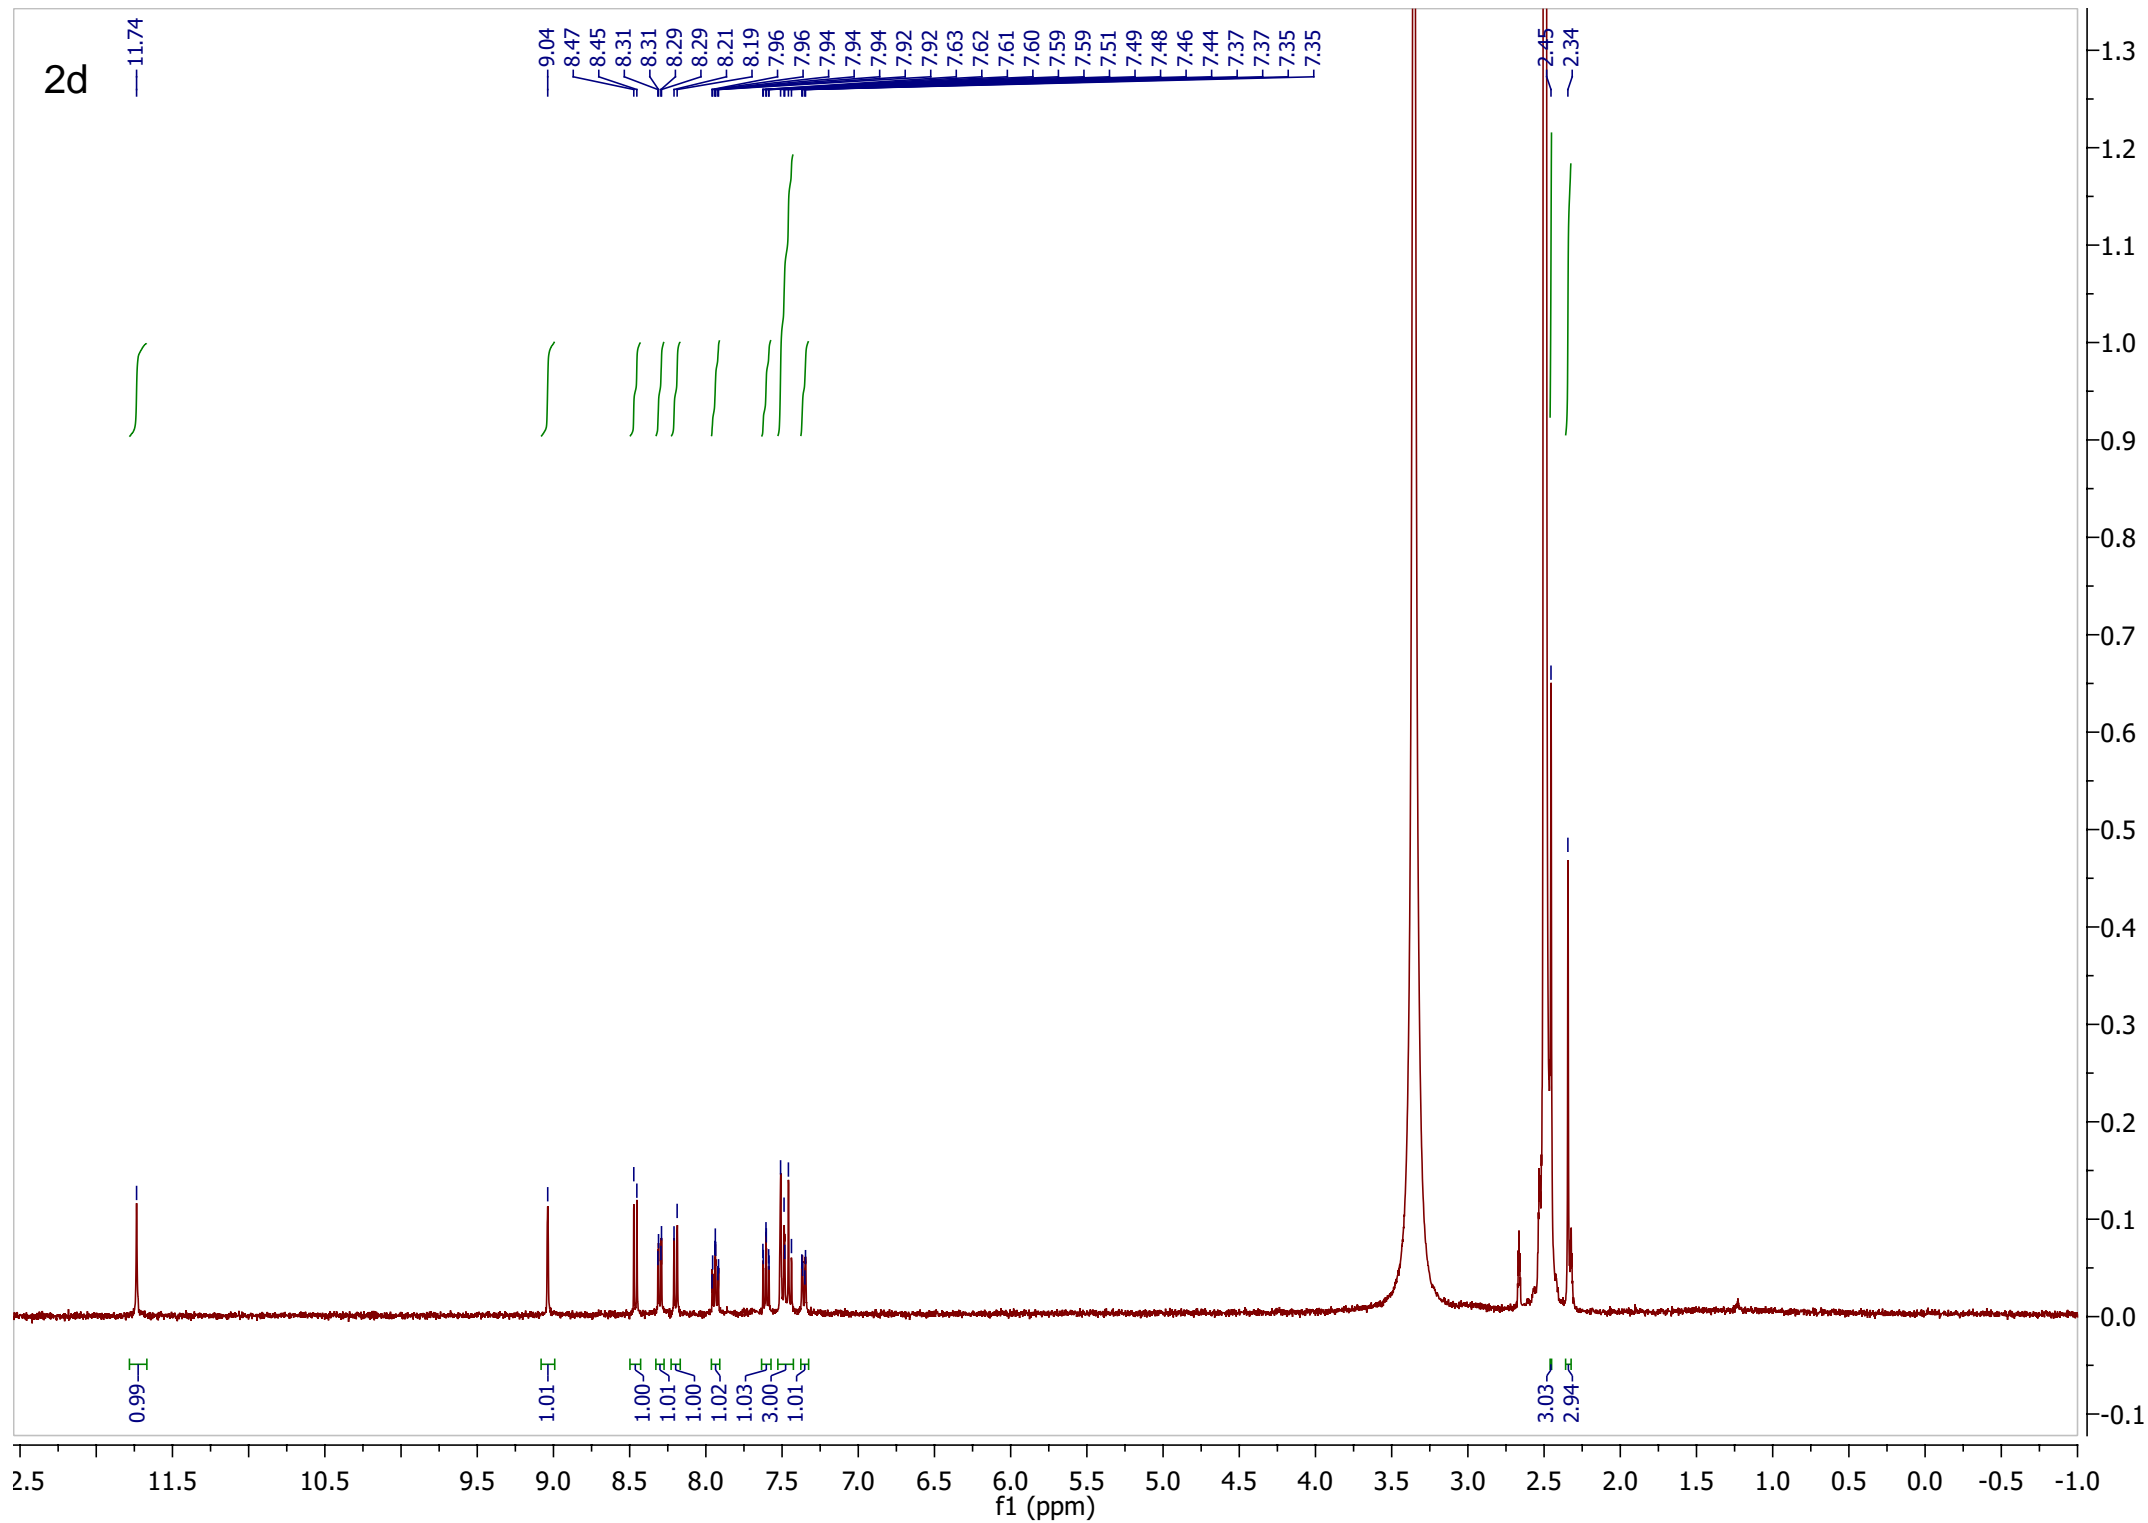

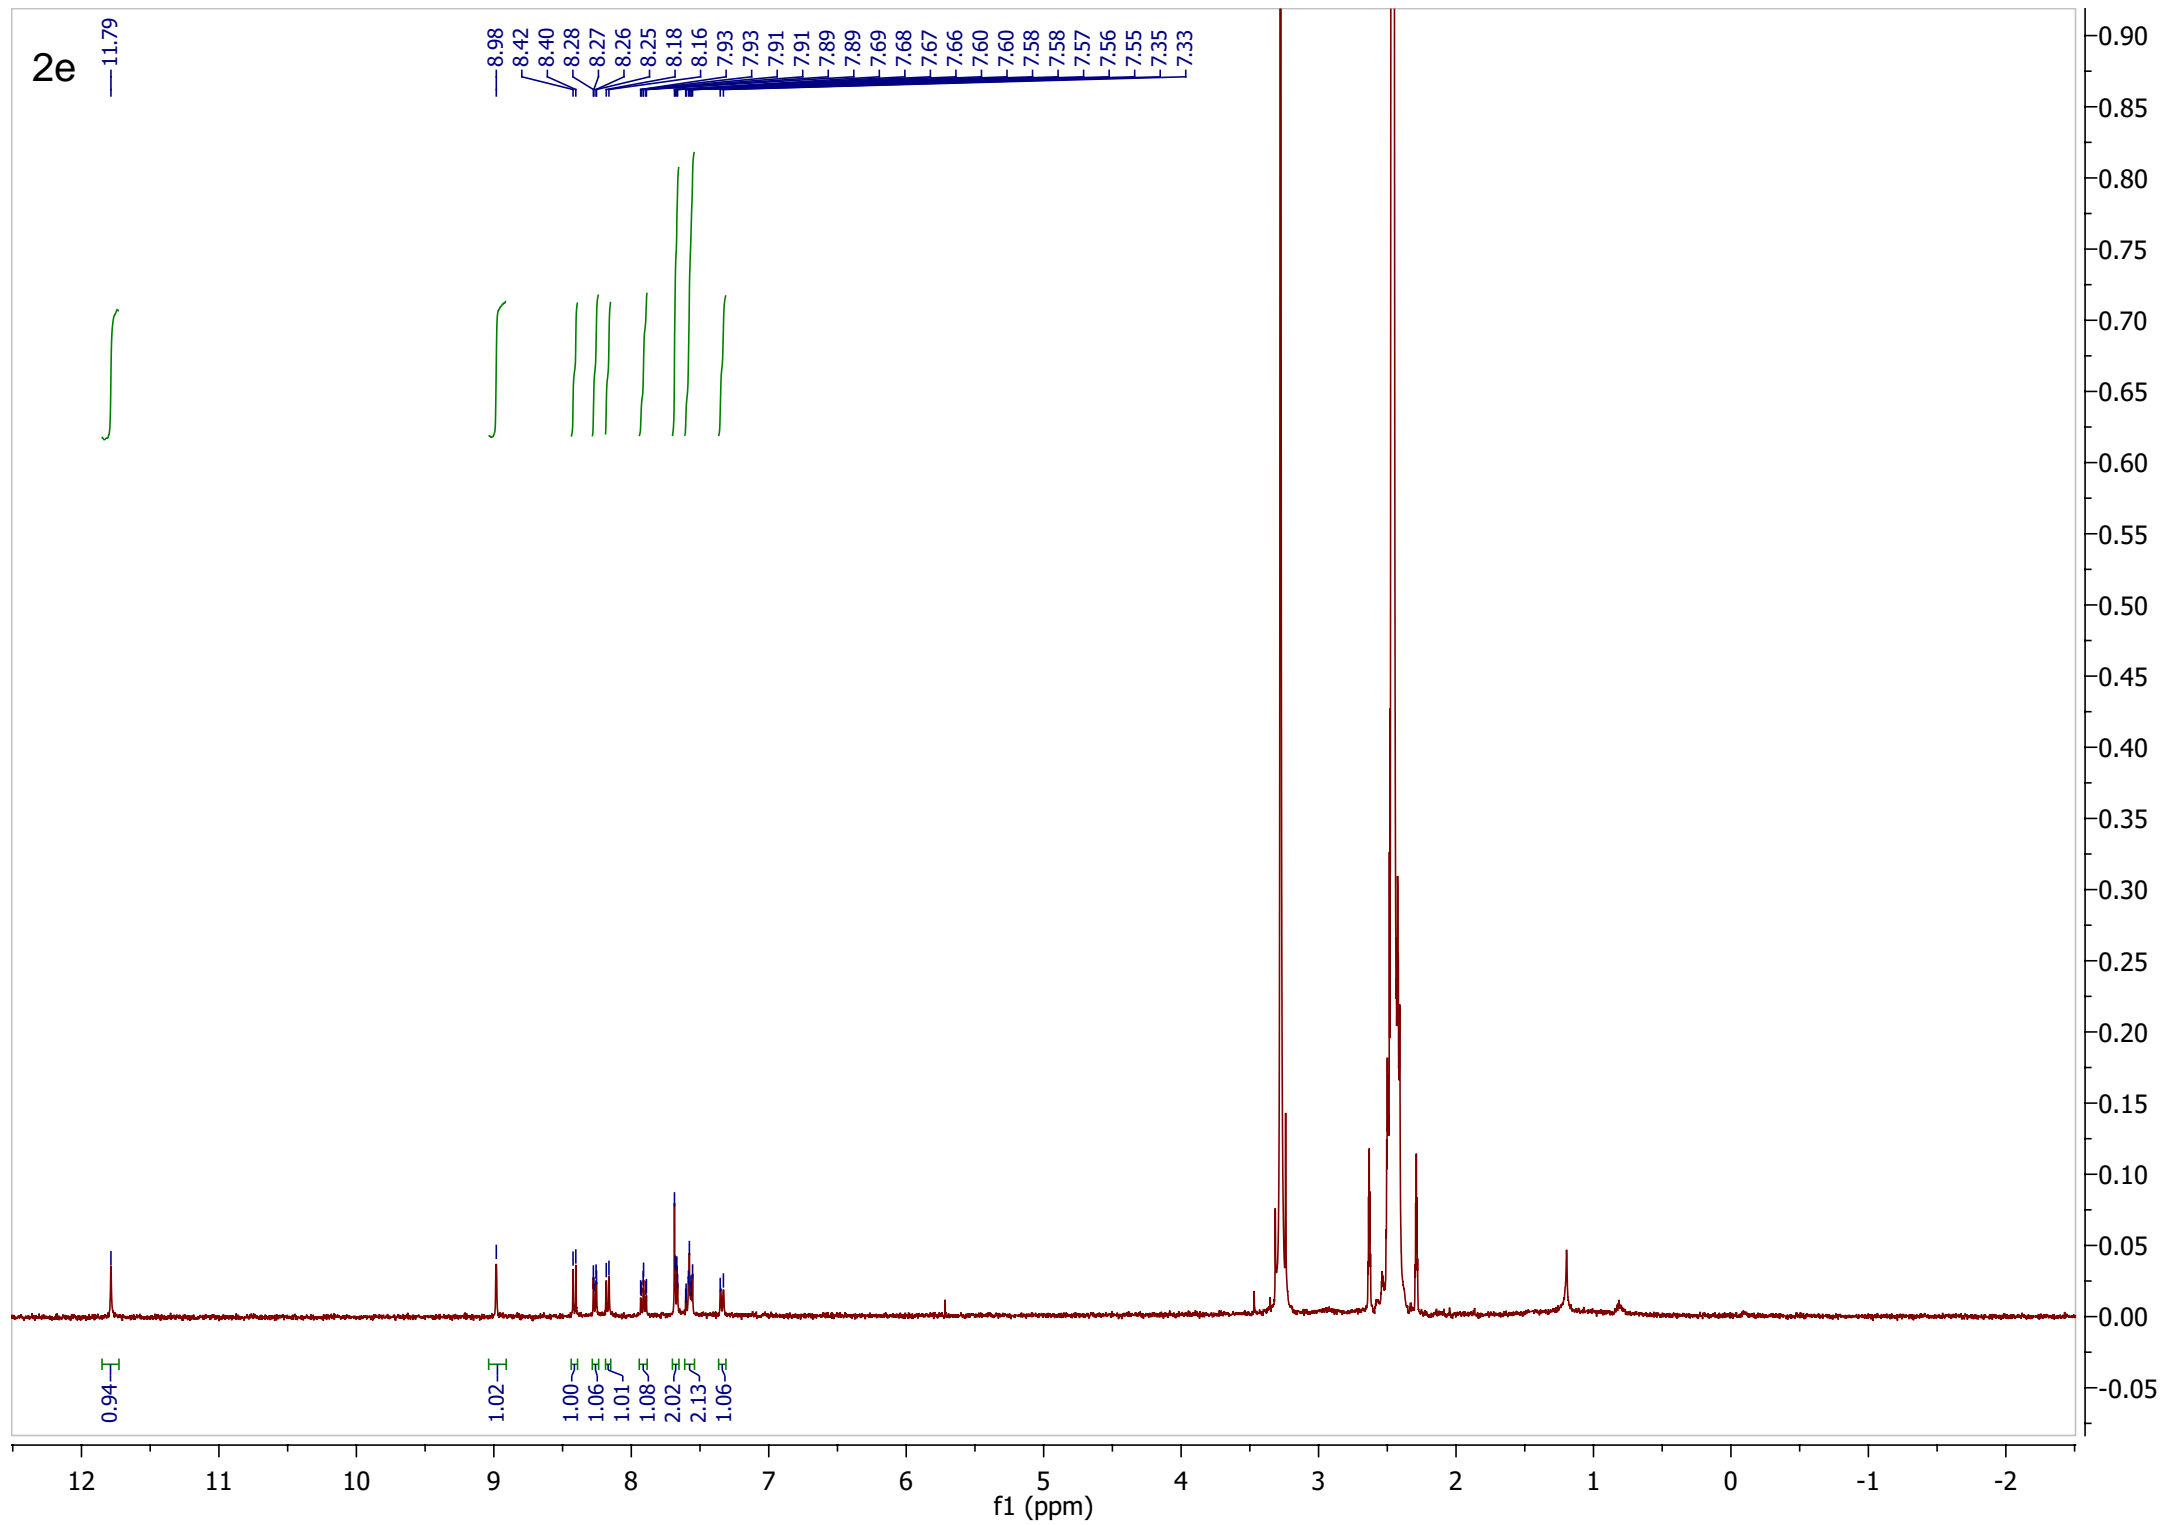

2e

—186.44

—158.64

—153.87

—150.28

—147.12

—137.94

—136.79

—135.67

—134.79

—130.70

—128.42

—127.77

—126.92

—126.40

—124.28

—115.83

—108.45

—21.85

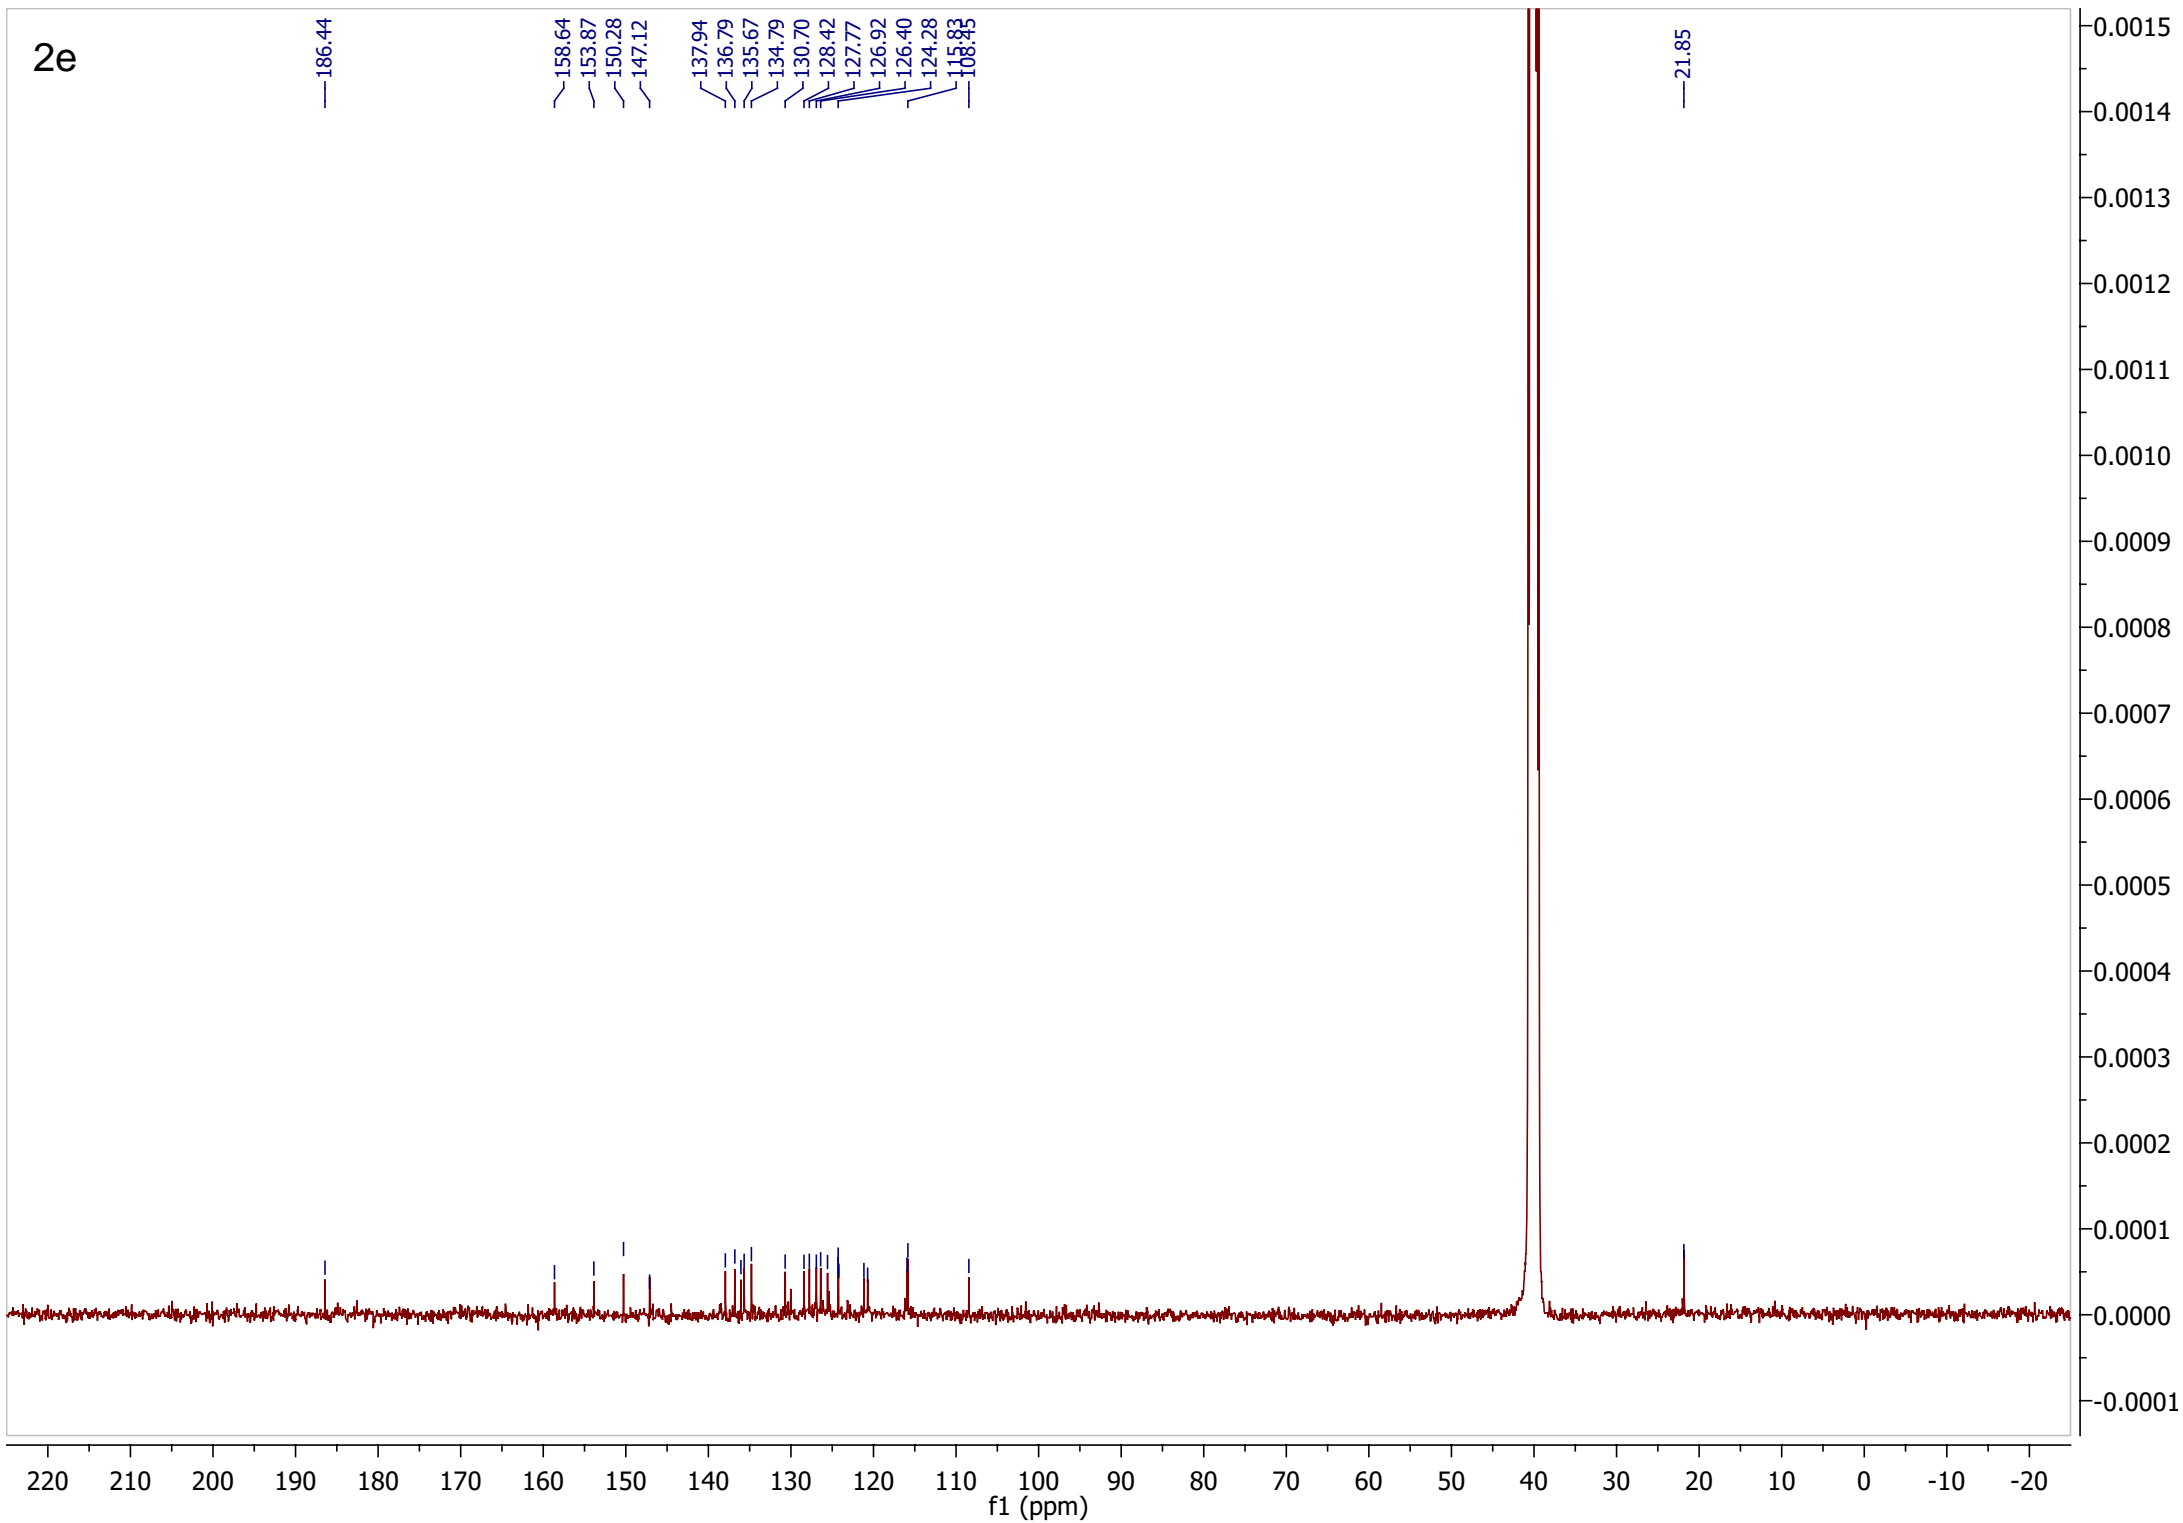



2f

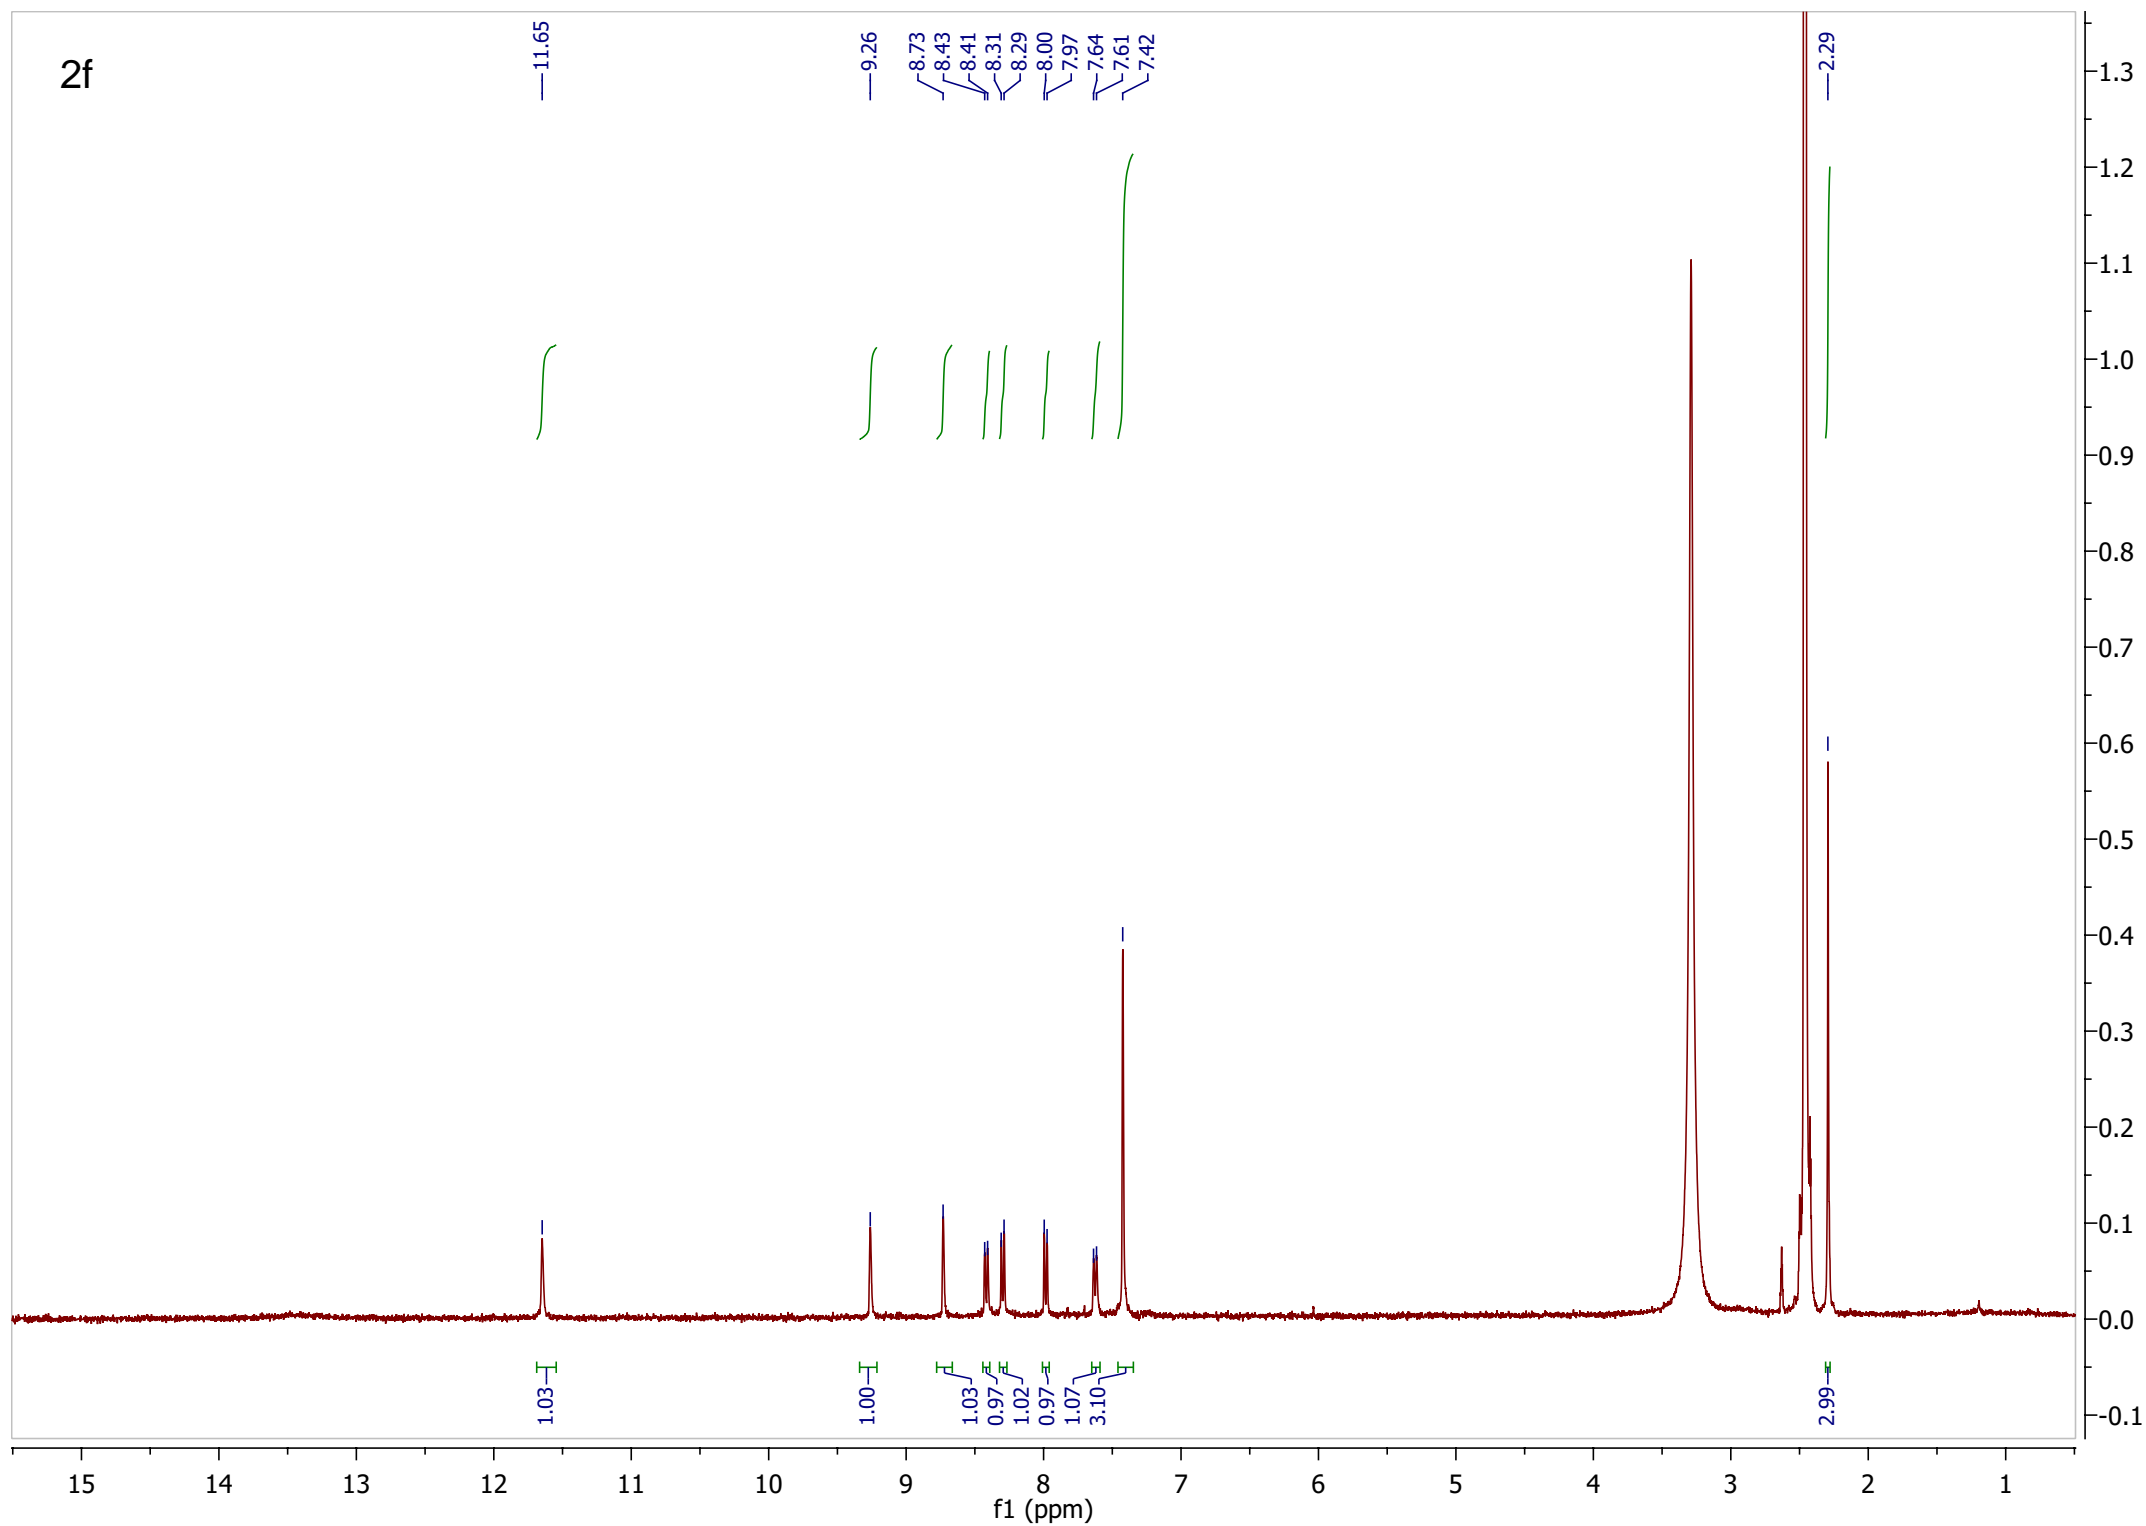

2g

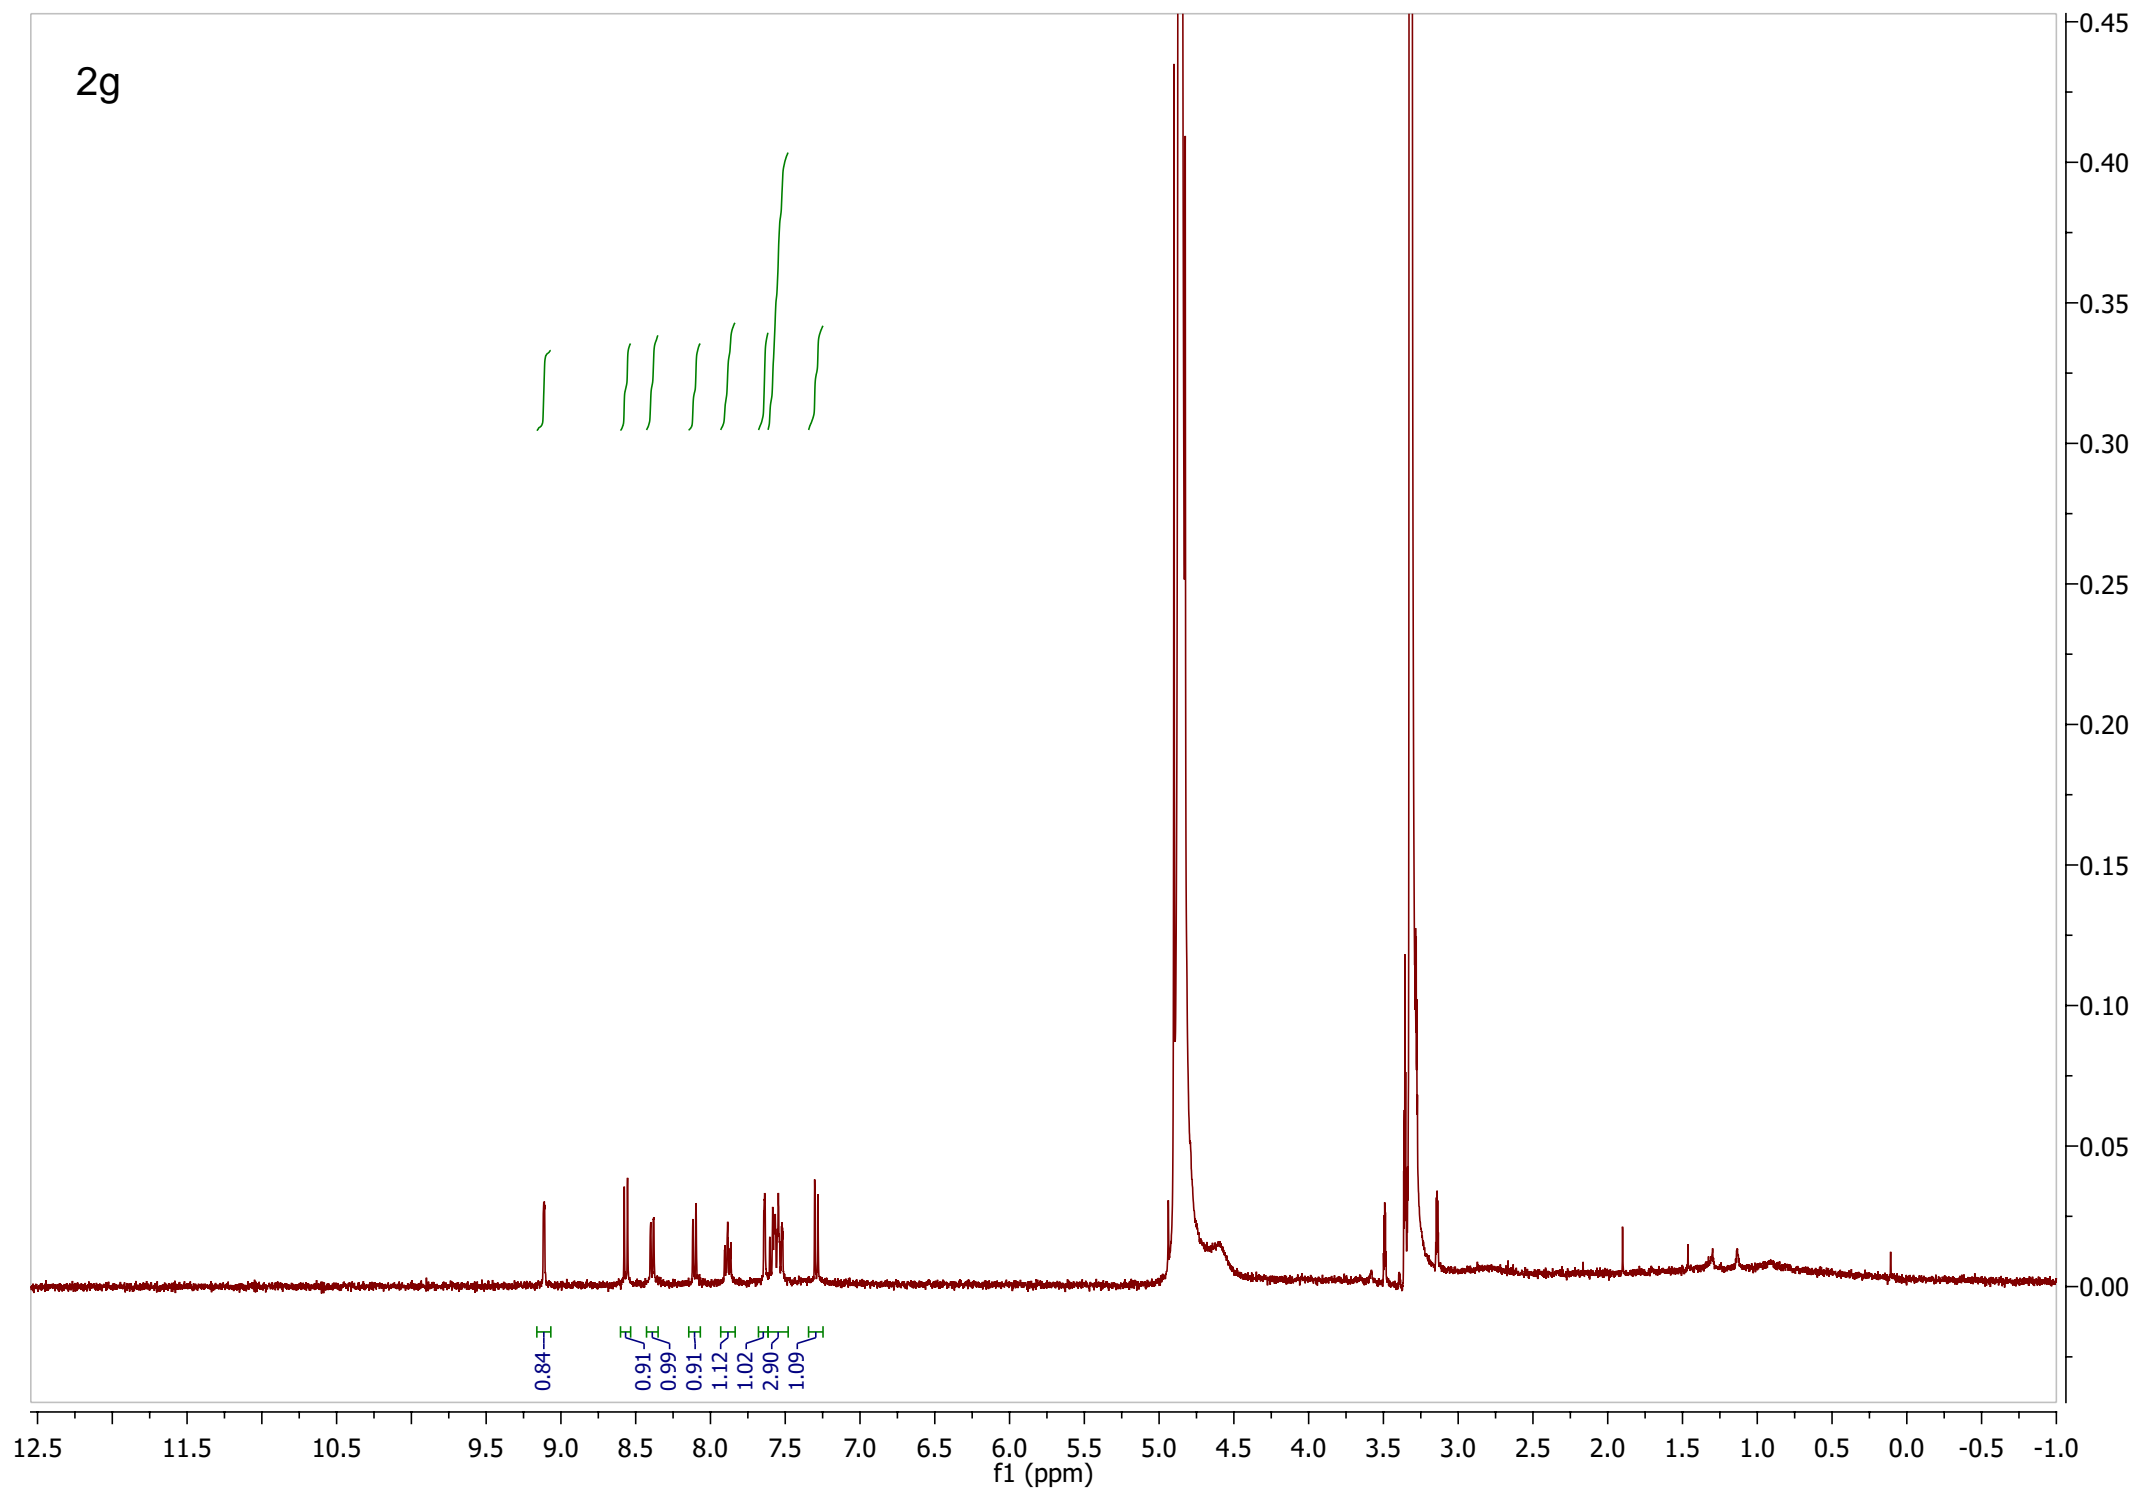

Supplement: s1 [file s1]
